# Supplementary material for: Meroterpene-Like α-Glucosidase Inhibitors Based on Biomimetic Reactions Starting from β-Caryophyllene
Source: PubMed Central journal article supplement (PMC7024386; doi:10.3390/molecules25020260), 2020-01-08

# Meroterpene-like $\alpha$ -glucosidase inhibitors based on biomimic reactions starting from $\beta$ -caryophyllene

Da-Wei Yan<sup>1</sup>, Cheng-Di Huang<sup>1</sup>, Hang-Hang Zheng<sup>1</sup>, Na Zhao, Shuang-Jiang Ma<sup>1</sup>, Xiao-Lan Feng<sup>2</sup>, Jin-Ming Gao<sup>1,\*</sup> and Qiang Zhang<sup>1,\*</sup>

- 1 Shaanxi Key Laboratory of Natural Products & Chemical Biology, College of Chemistry & Pharmacy, Northwest A&F University, Yangling 712100, PR China; 15829769577@163.com (D.-W.Y.), chengdihuang@nwfau.edu.cn (C.-D.H.), zhh18710683097@163.com (H.-H.Z.), 1984162639@nwfau.edu.cn (N.Z.), tianjjuechen00@163.com (S.-J.M.)
  - 2 College of veterinary medicine, Northwest A&F University, Yangling 712100, PR China, xiaolanfeng@nwfau.edu.cn
- \* Correspondence: jinminggao@nwsuaf.edu.cn (J.-M.G.), zhangq@nwsuaf.edu.cn (Q.Z.); Tel.: +86-0298-709-2335 (J.-M.G.), +86-1809-272-0670 (Q.Z.)

## Content

|                                                         |    |
|---------------------------------------------------------|----|
| Figure S1. GC-EI MS (a) and LC-ESI-MS/MS analysis ..... | 2  |
| Figure S2: NMR and HR-MS spectra .....                  | 4  |
| Compound 1a .....                                       | 4  |
| Compound 2a .....                                       | 7  |
| Compound 3a .....                                       | 10 |
| Compound 4a .....                                       | 13 |
| Compound 5a .....                                       | 16 |
| Compound 1b .....                                       | 23 |
| Compound 2b .....                                       | 26 |
| Compound 3b .....                                       | 29 |
| Compound 4b .....                                       | 32 |
| Compound 5b .....                                       | 35 |
| Compound 1c .....                                       | 38 |
| Compound 2c .....                                       | 41 |
| Compound 3c .....                                       | 44 |
| Compound 4c .....                                       | 47 |
| Compound 5c .....                                       | 50 |
| Compound 6 .....                                        | 53 |
| Compound 7 .....                                        | 60 |

**Figure S1. GC-EI MS (a) and LC-ESI-MS/MS analysis**

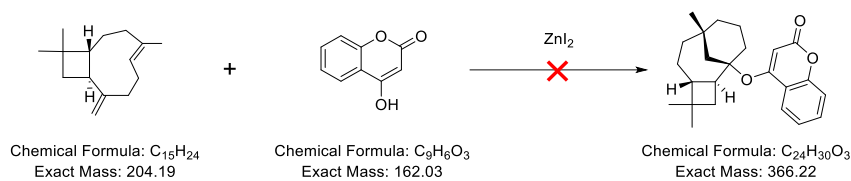

**(a) GC-EI-MS analysis**

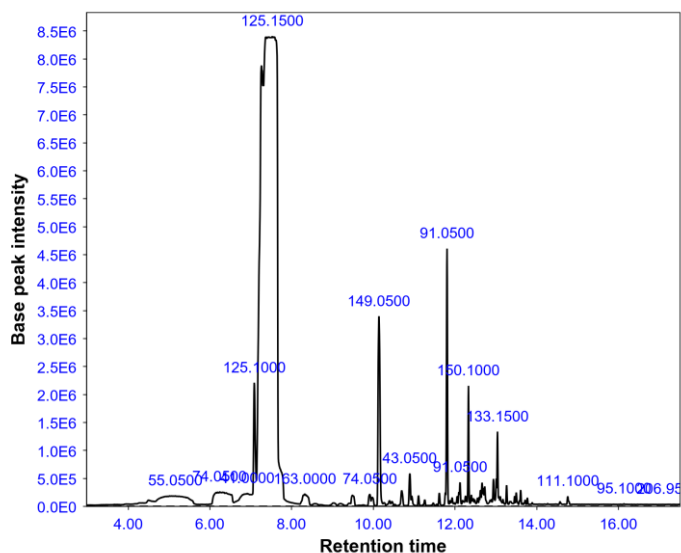

The crude product was dissolved in MeOH (200  $\mu\text{g}/\text{ml}$ ) and was analyzed on a Shimadzu GCMS-QP2010 Ultra instrument equipped with a capillary column of Rxi<sup>®</sup>-5Sil MS (30 m  $\times$  0.25 mm i.d., 0.25  $\mu\text{m}$  film thickness). Helium (He) gas was used as a mobile phase at a constant flow of 1.3 mL/min. The temperature was held at 150  $^{\circ}\text{C}$  for 5 min, then increased to 300 at 4  $^{\circ}\text{C}/\text{min}$ , maintaining the last temperature for 5 min. The temperature of the ion source was 250  $^{\circ}\text{C}$ . EI-MS spectra ( $m/z$  35 ~ 500) were recorded with a scan event time of 0.3 s. Electron energy was 70 eV. The raw data was saved into netCDF format in the GCMS solution software and then was converted into mzXML format by ProteoWizard MSConvert 3. The TIC chromatography was extracted using MZMine2.

**(b) LC-QTOF-MS/MS analysis**

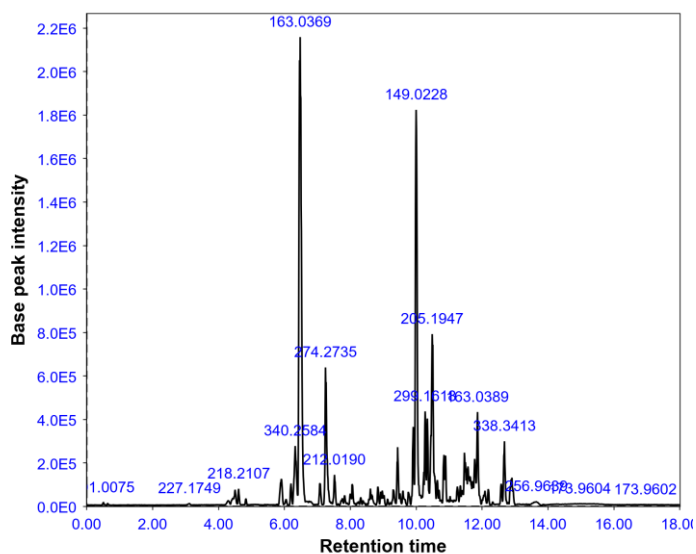

The crude product was analyzed by AB SCIEX TripleTOF5600+ equipped with a Shimadzu UPLC (LC-30A) Shim-pack XR-ODS (100 mm × 2.1 mm, 1.7 μ m) column. The temperature was maintained at 30 °C. Mixtures of H<sub>2</sub>O (A), and MeOH (B) were eluted at the flow rate of 0.3 mL/min with a linear gradient of 10 ~ 100% B (0 – 17 min). The samples (200 μg/mL in MeOH, 2 μ L portions were injected) were analyzed in data-dependent acquisition (DDA) mode. The full MS survey scan was performed for 150 ms in the range of  $m/z$  100 ~ 2000; The collision energy was set as 40 eV. The raw data were converted to the mzXML format with MSConvert 3.0. The TIC chromatography was extracted using MZMine2 with  $m/z$  range 100~1500.

Figure S2: NMR and HR-MS spectra

Compound 1a

1a  $^1\text{H}$  NMR

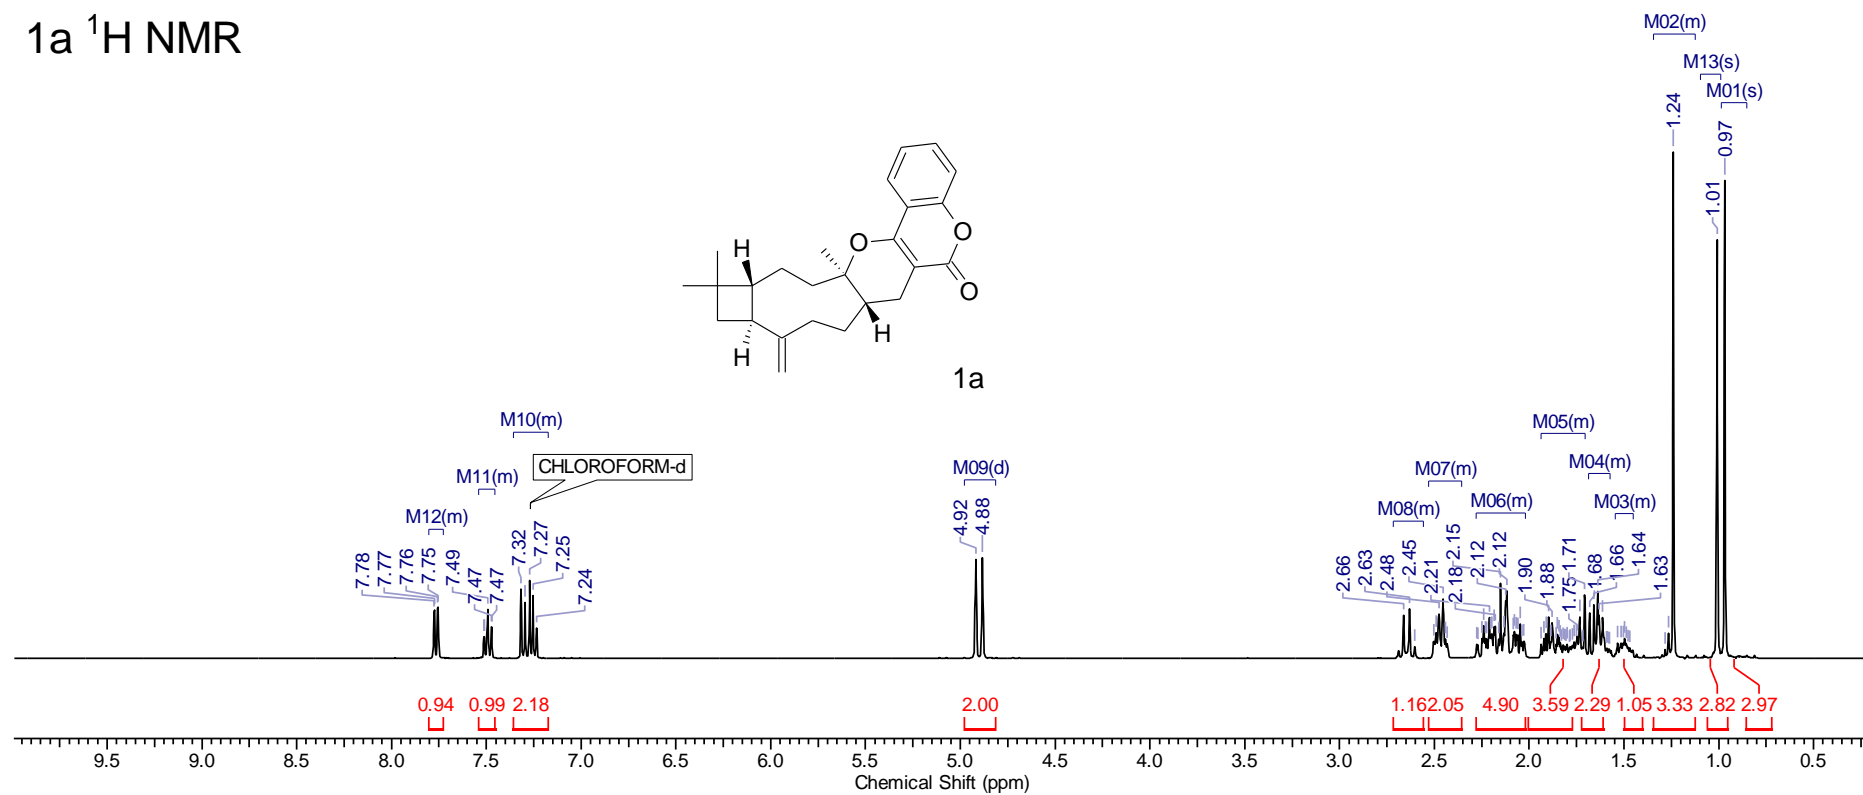

DEPT135 and  $^{13}\text{C}$  NMR

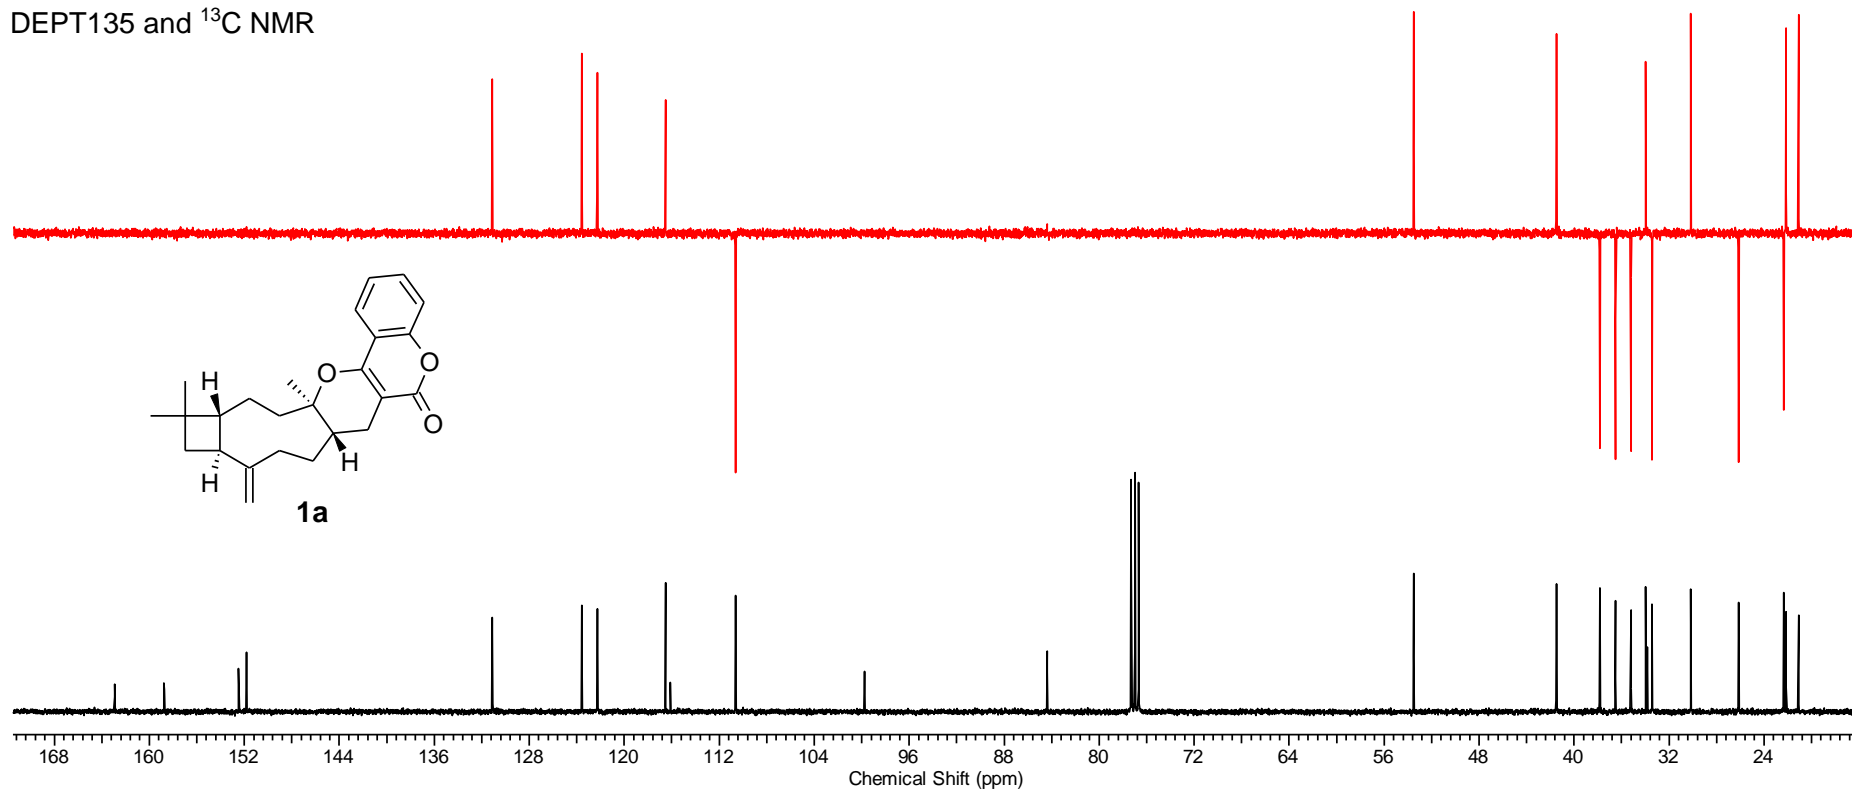

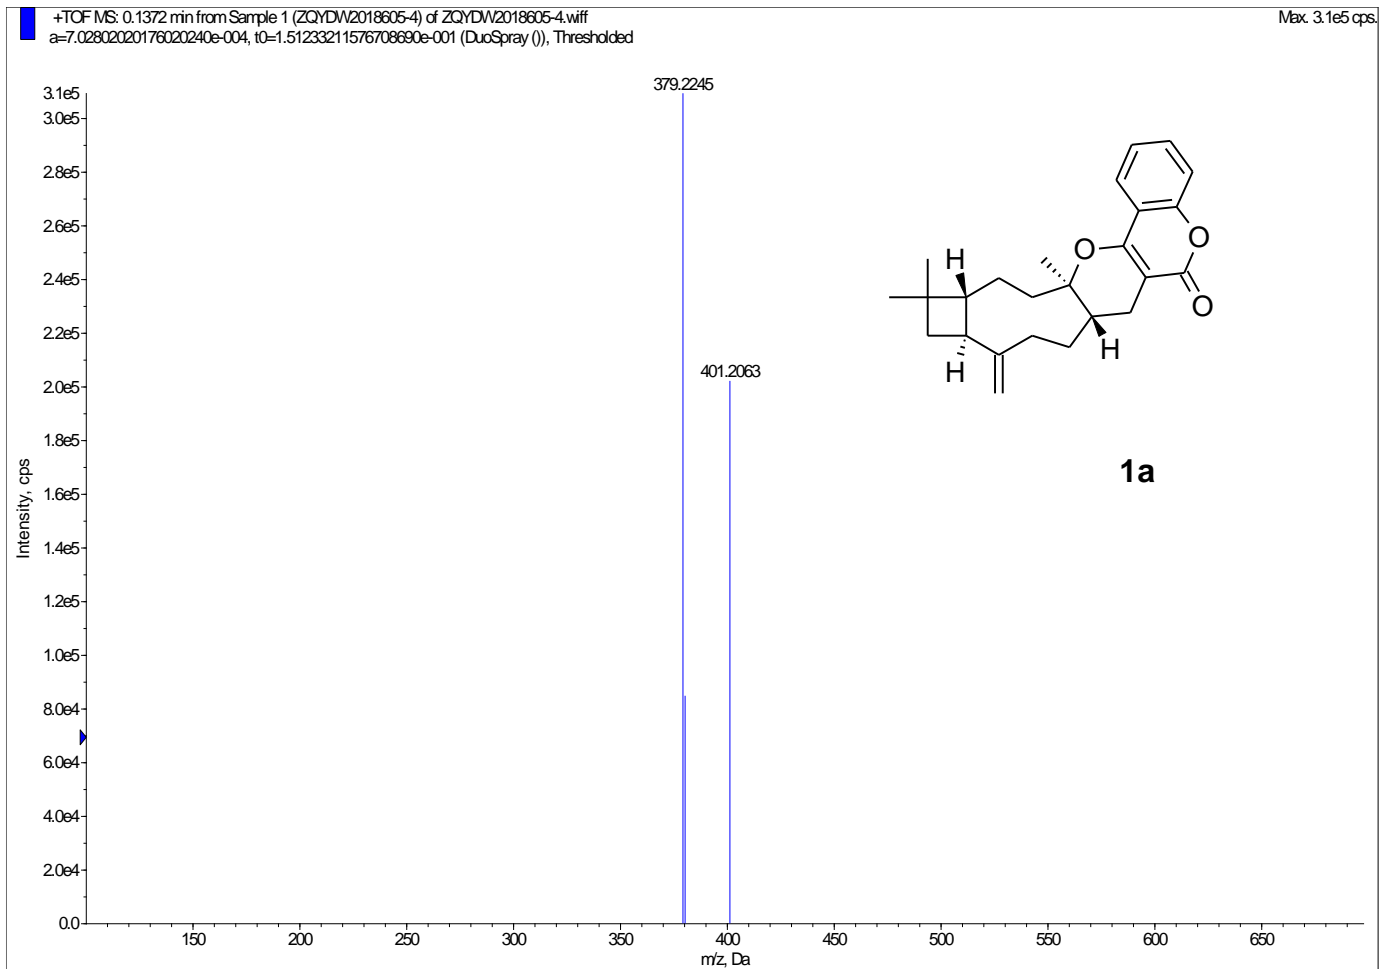

# Compound 2a

## 2a <sup>1</sup>H NMR

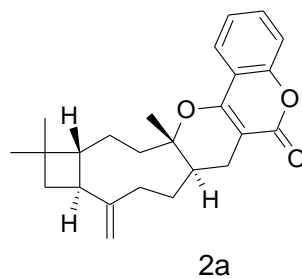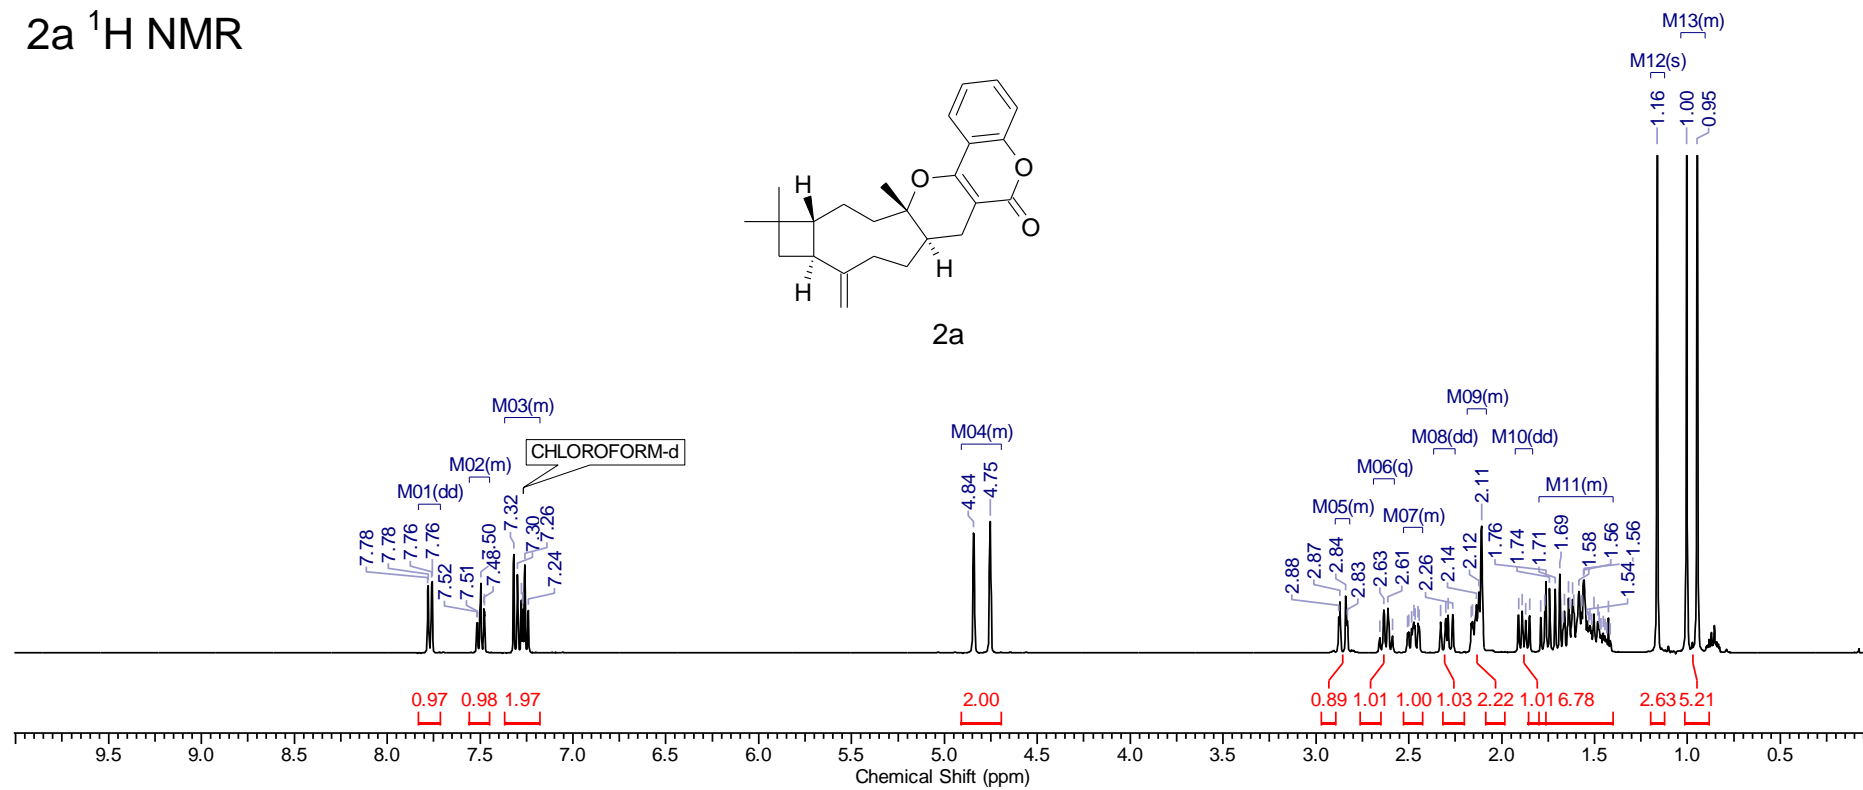

2a <sup>13</sup>C NMR

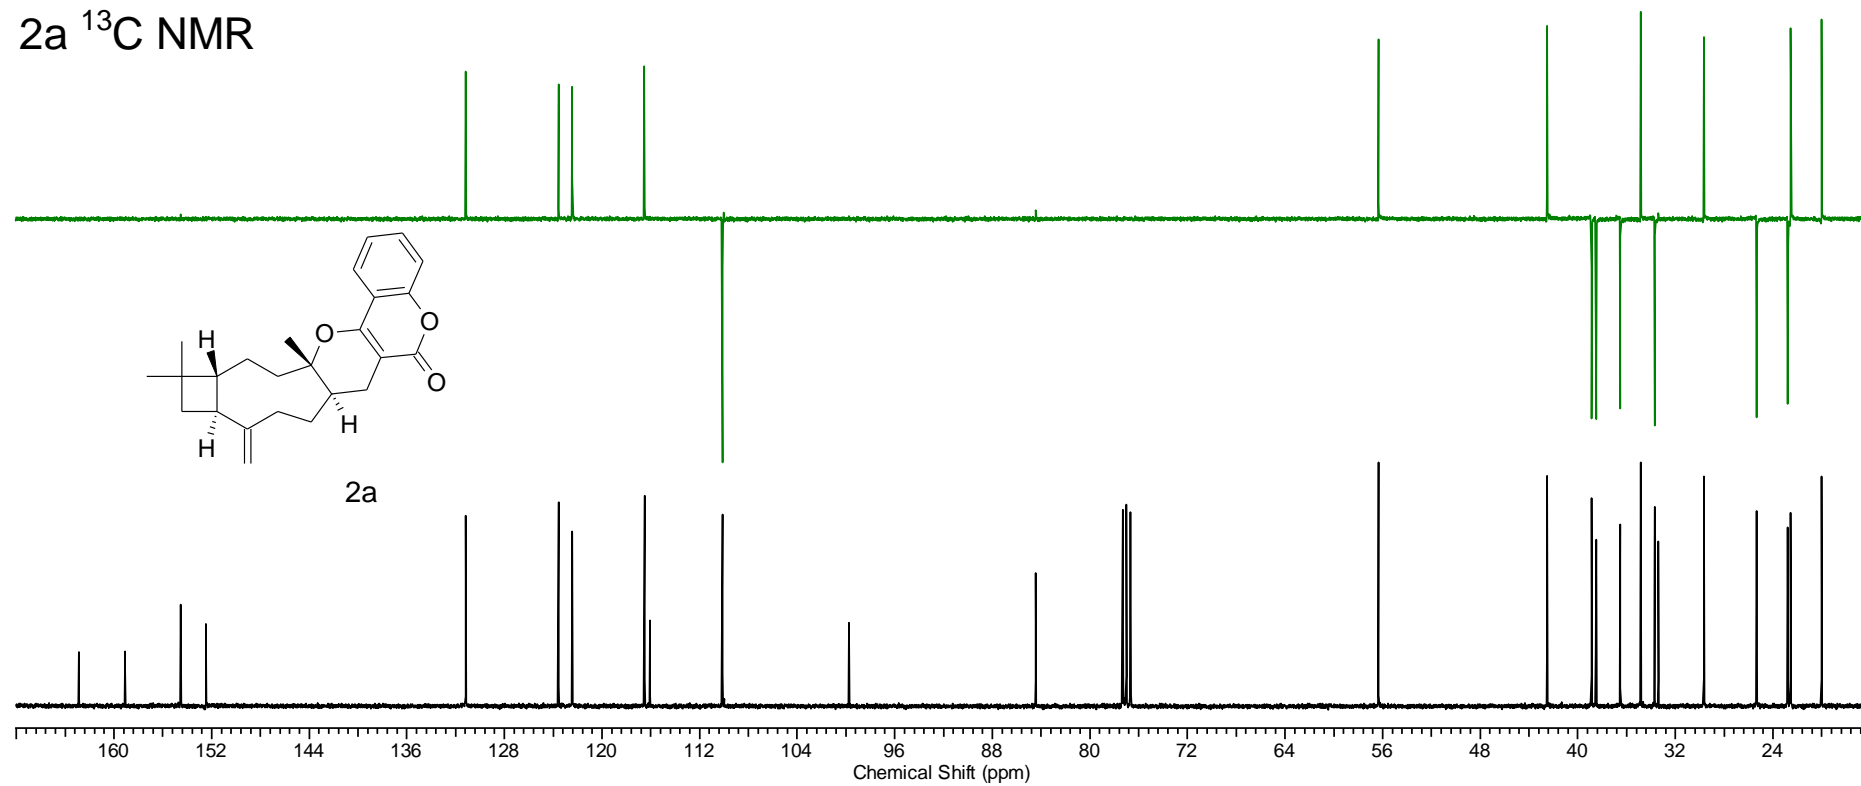



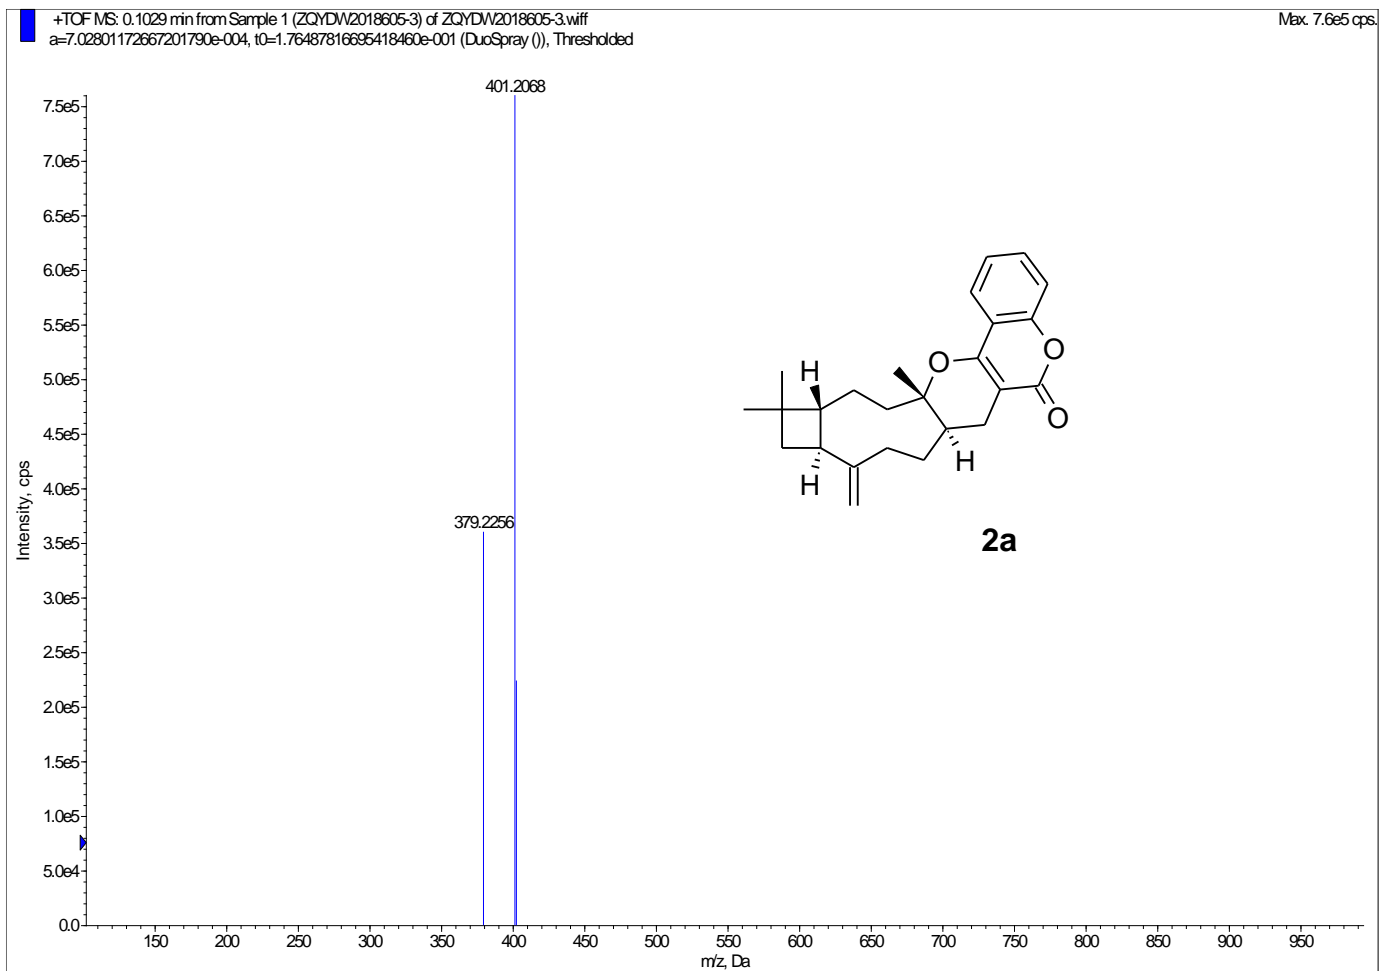

Compound 3a

3a <sup>1</sup>H NMR

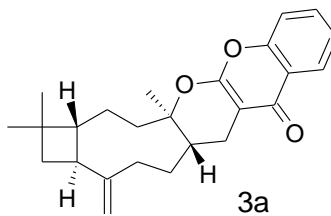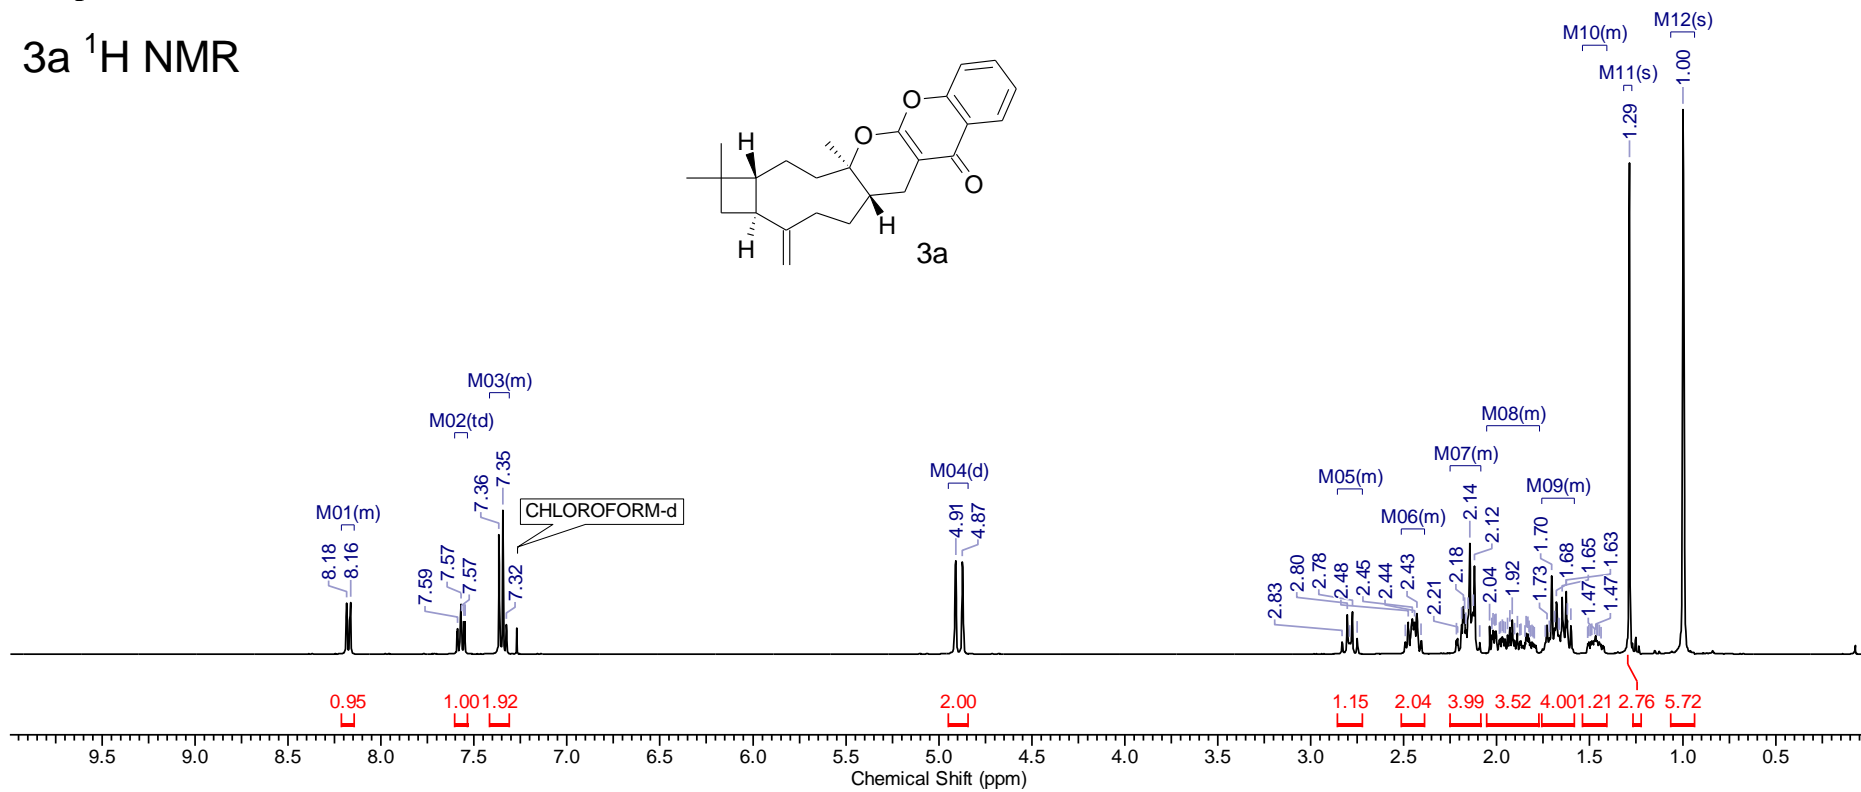

DEPT135 and  $^{13}\text{C}$  NMR

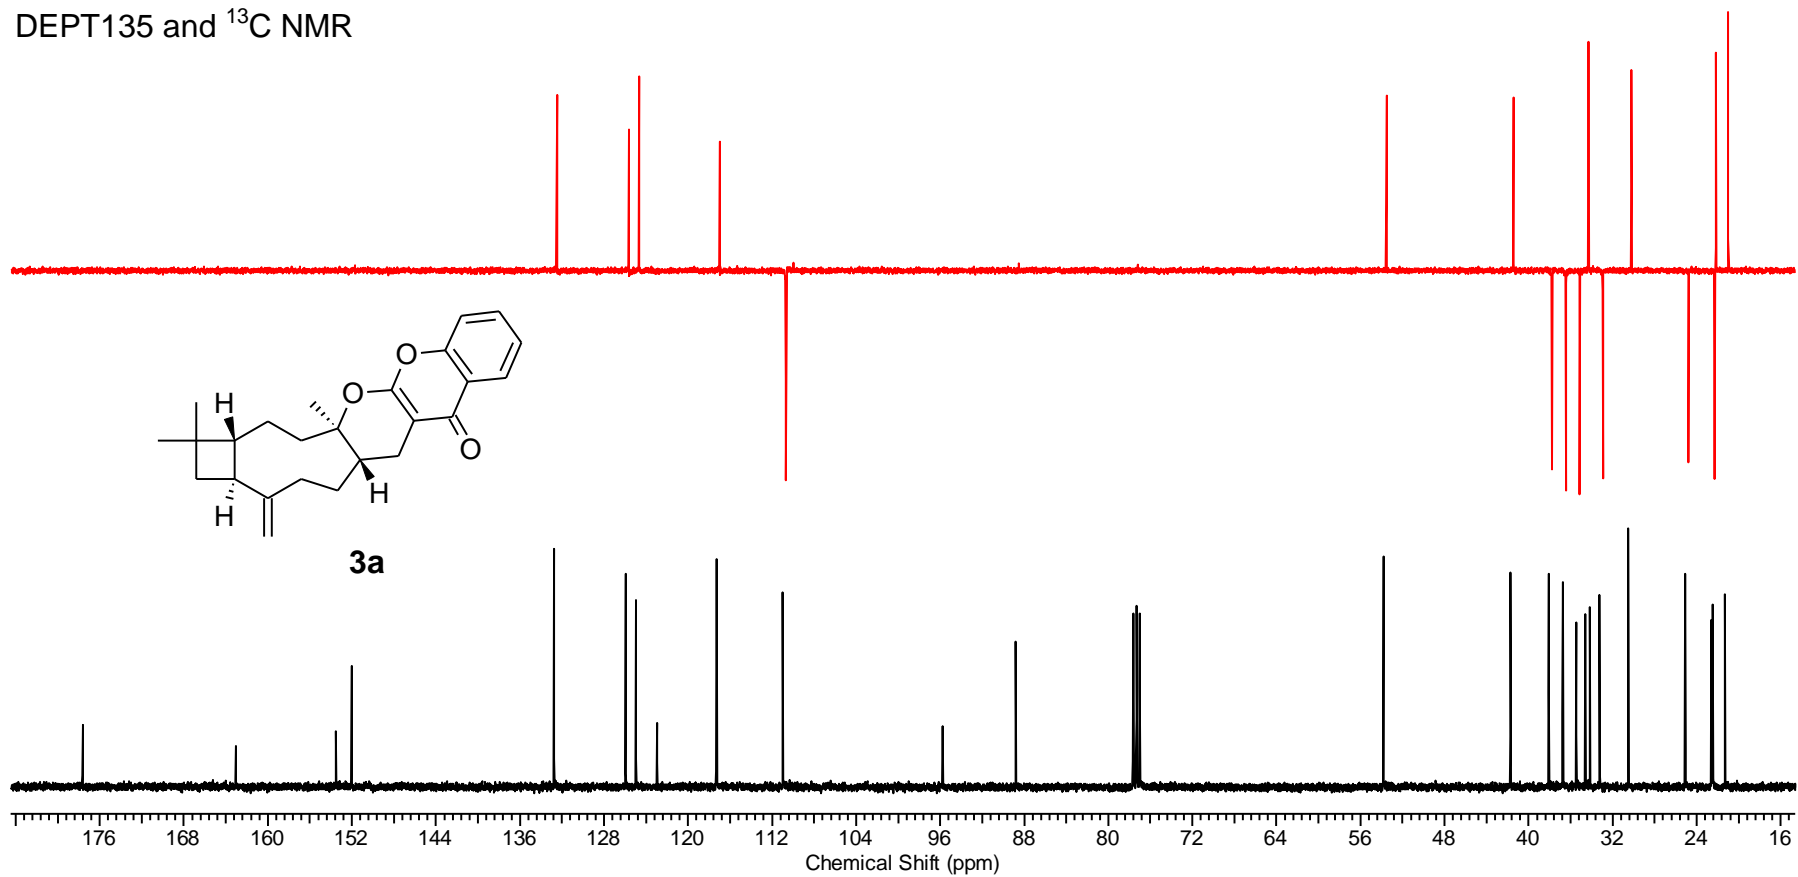

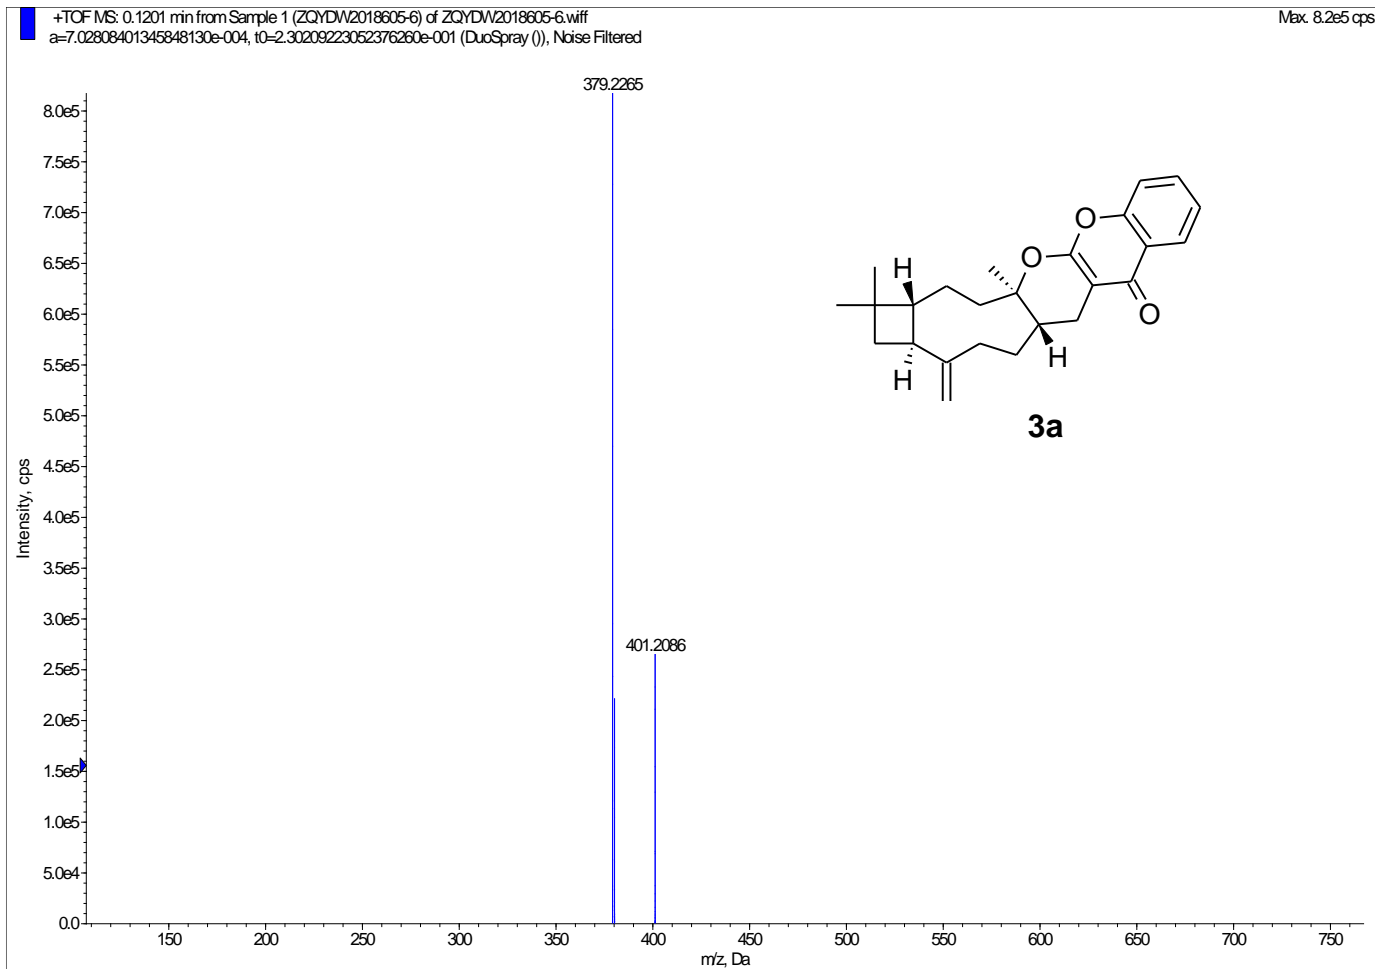

Compound 4a

4a <sup>1</sup>H NMR

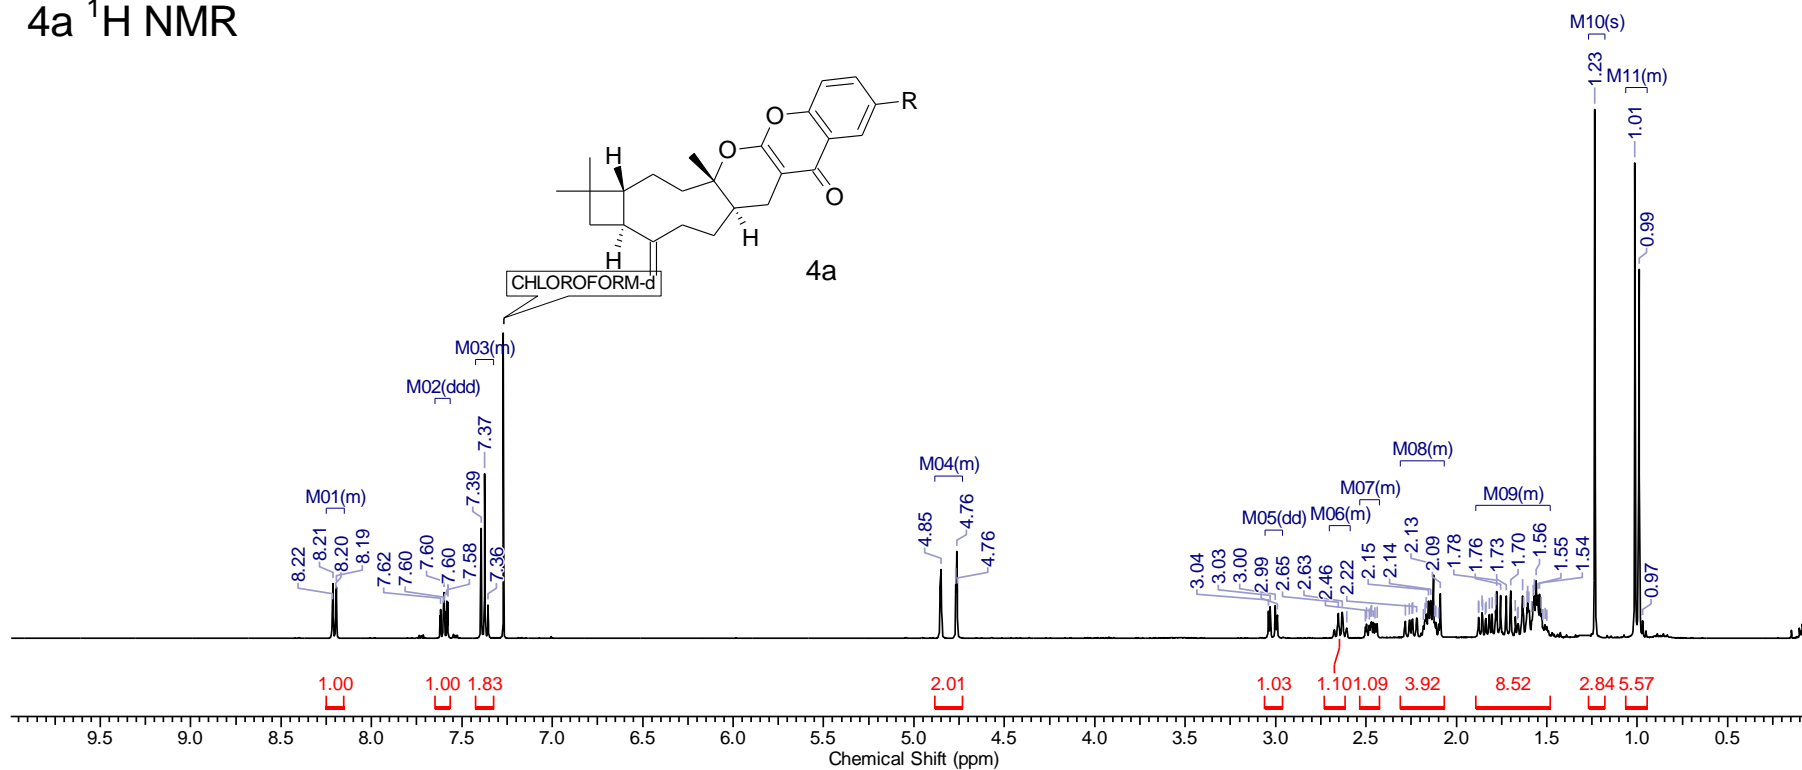

DEPT135 and  $^{13}\text{C}$  NMR

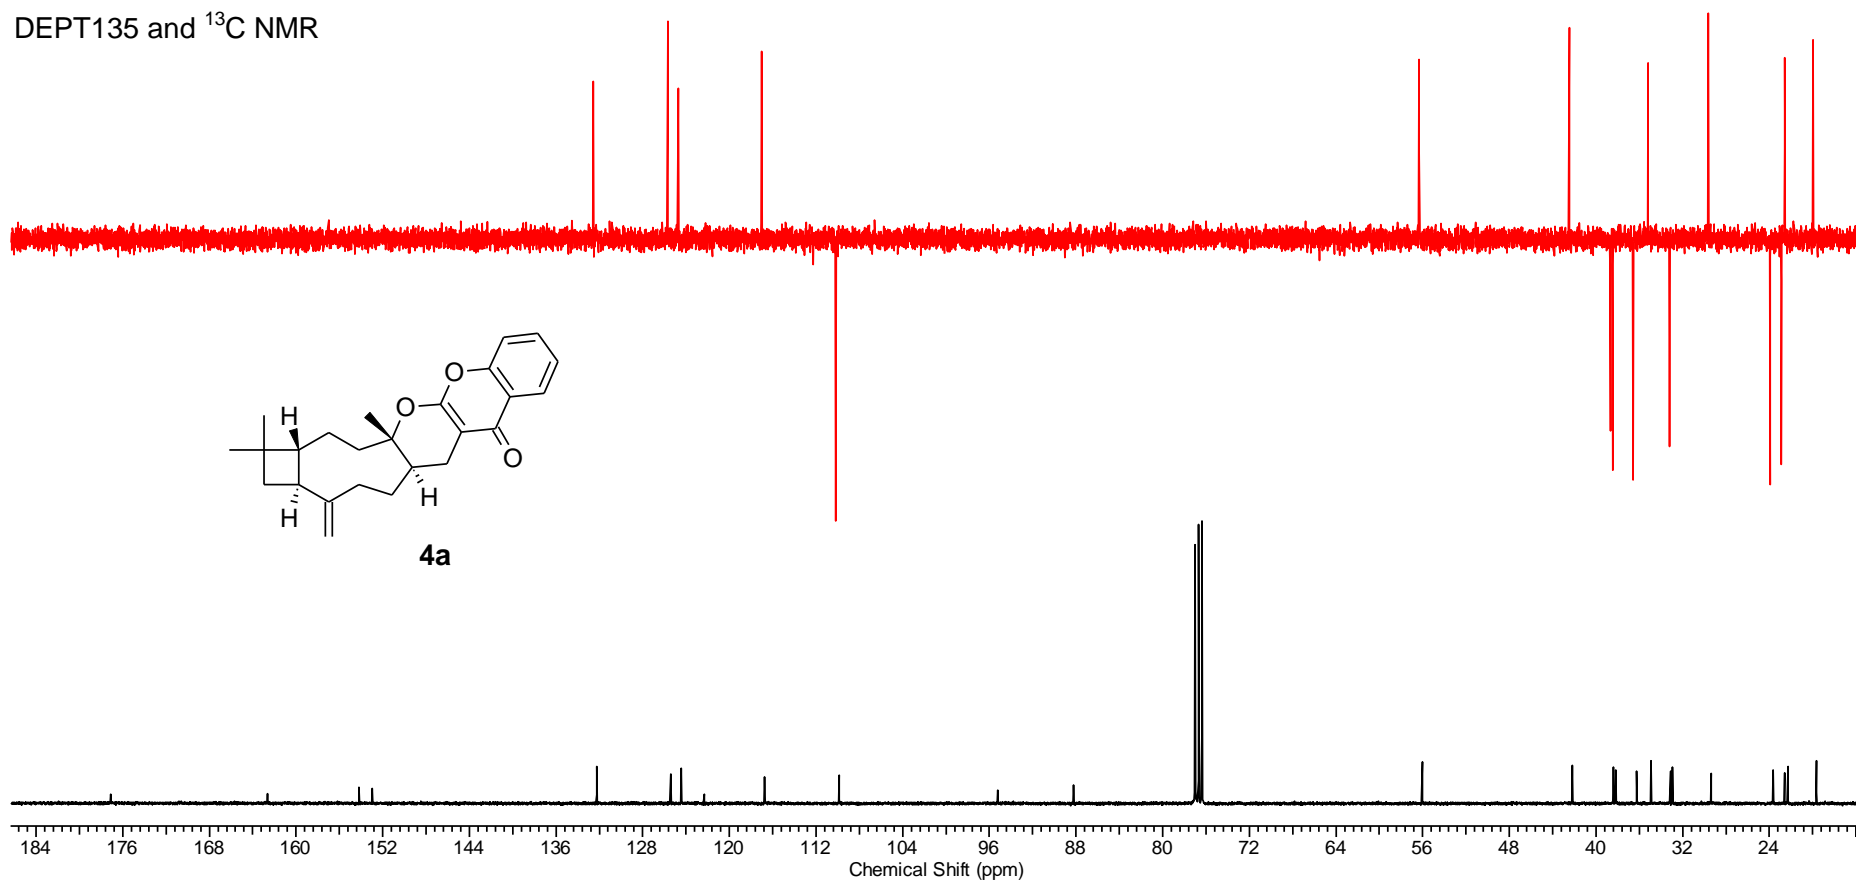

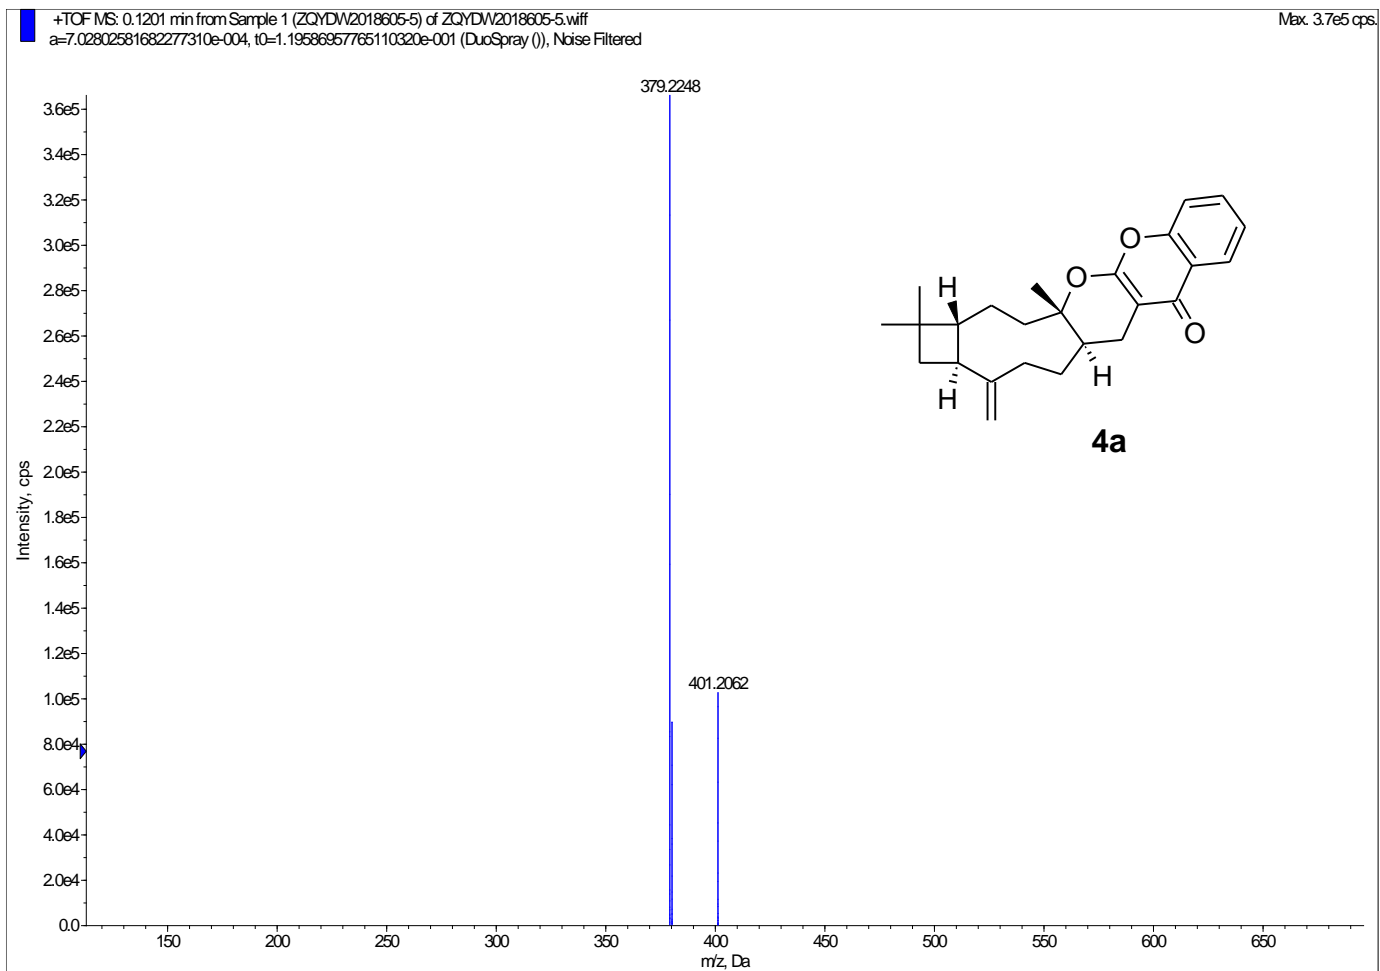

# Compound 5a

## 5a <sup>1</sup>H NMR

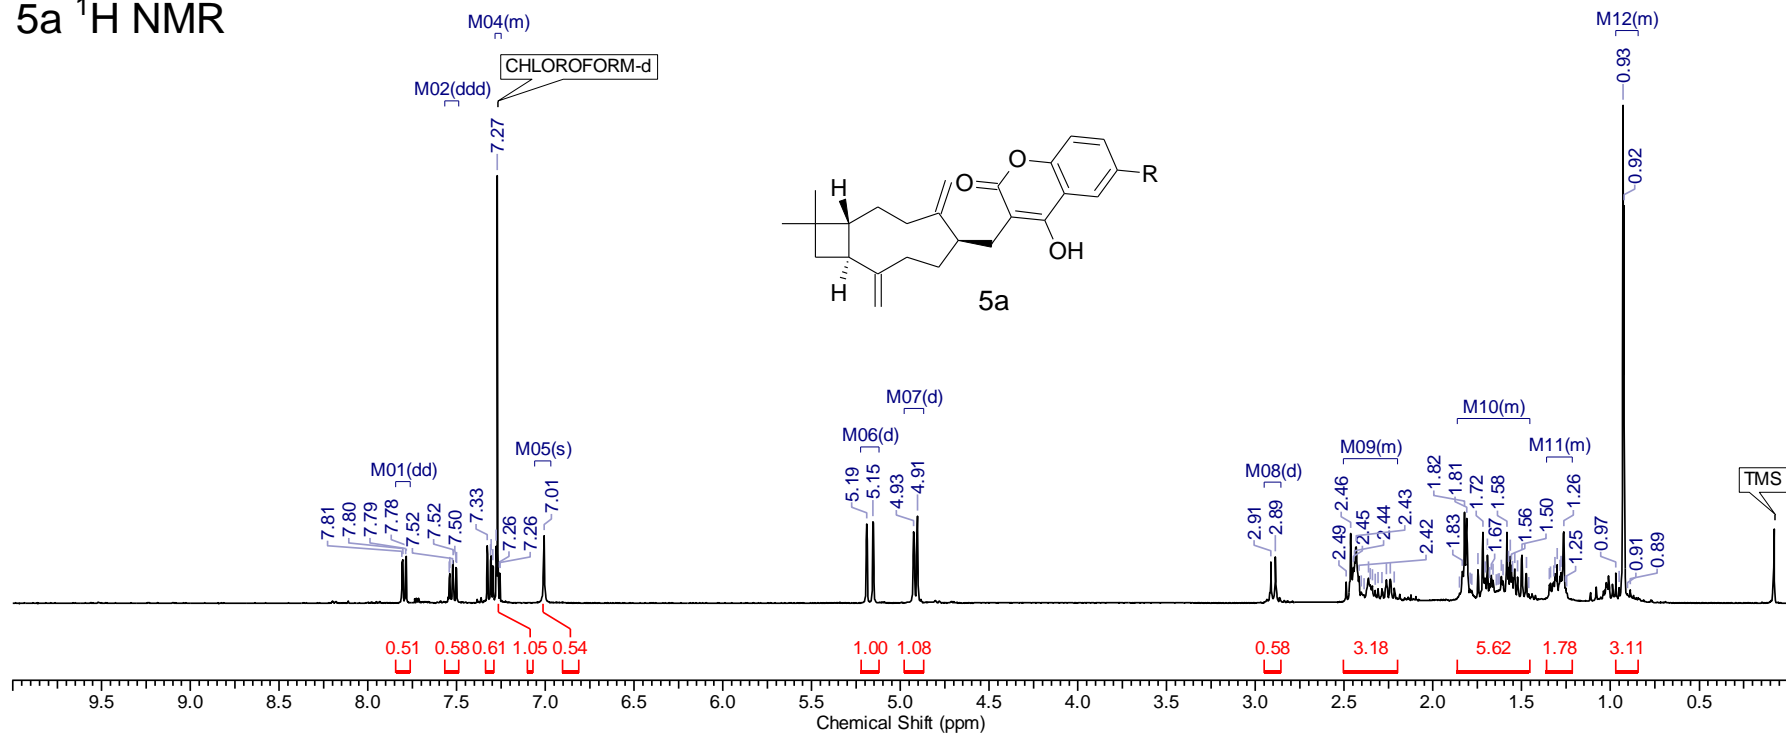



DEPT135 and  $^{13}\text{C}$  NMR

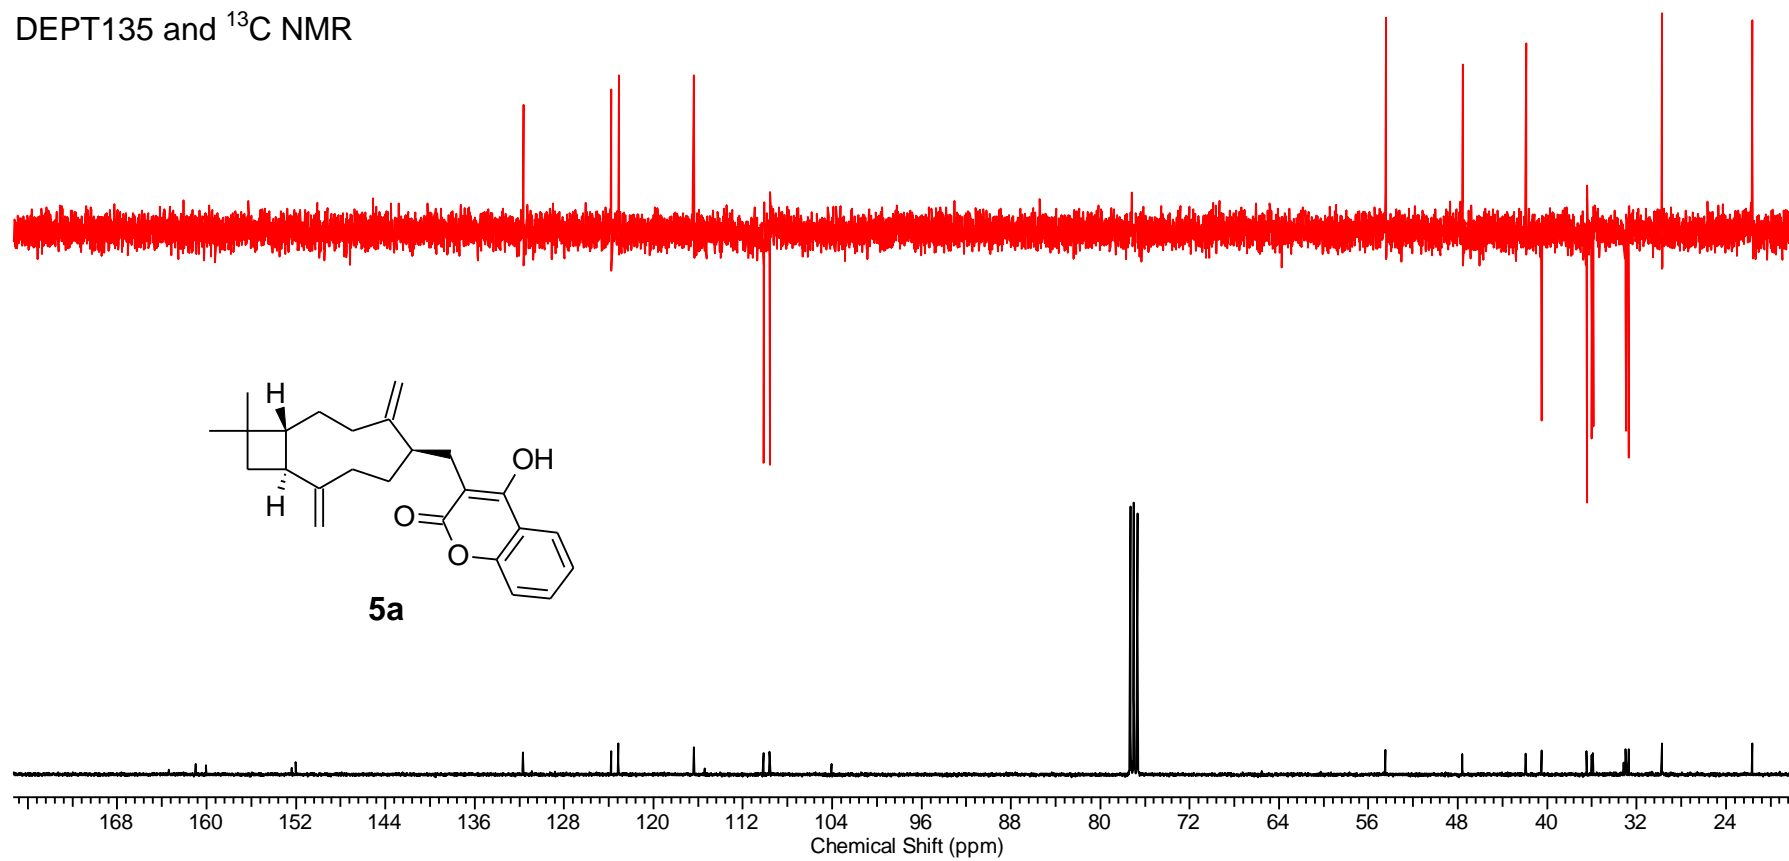

# 5a HSQC

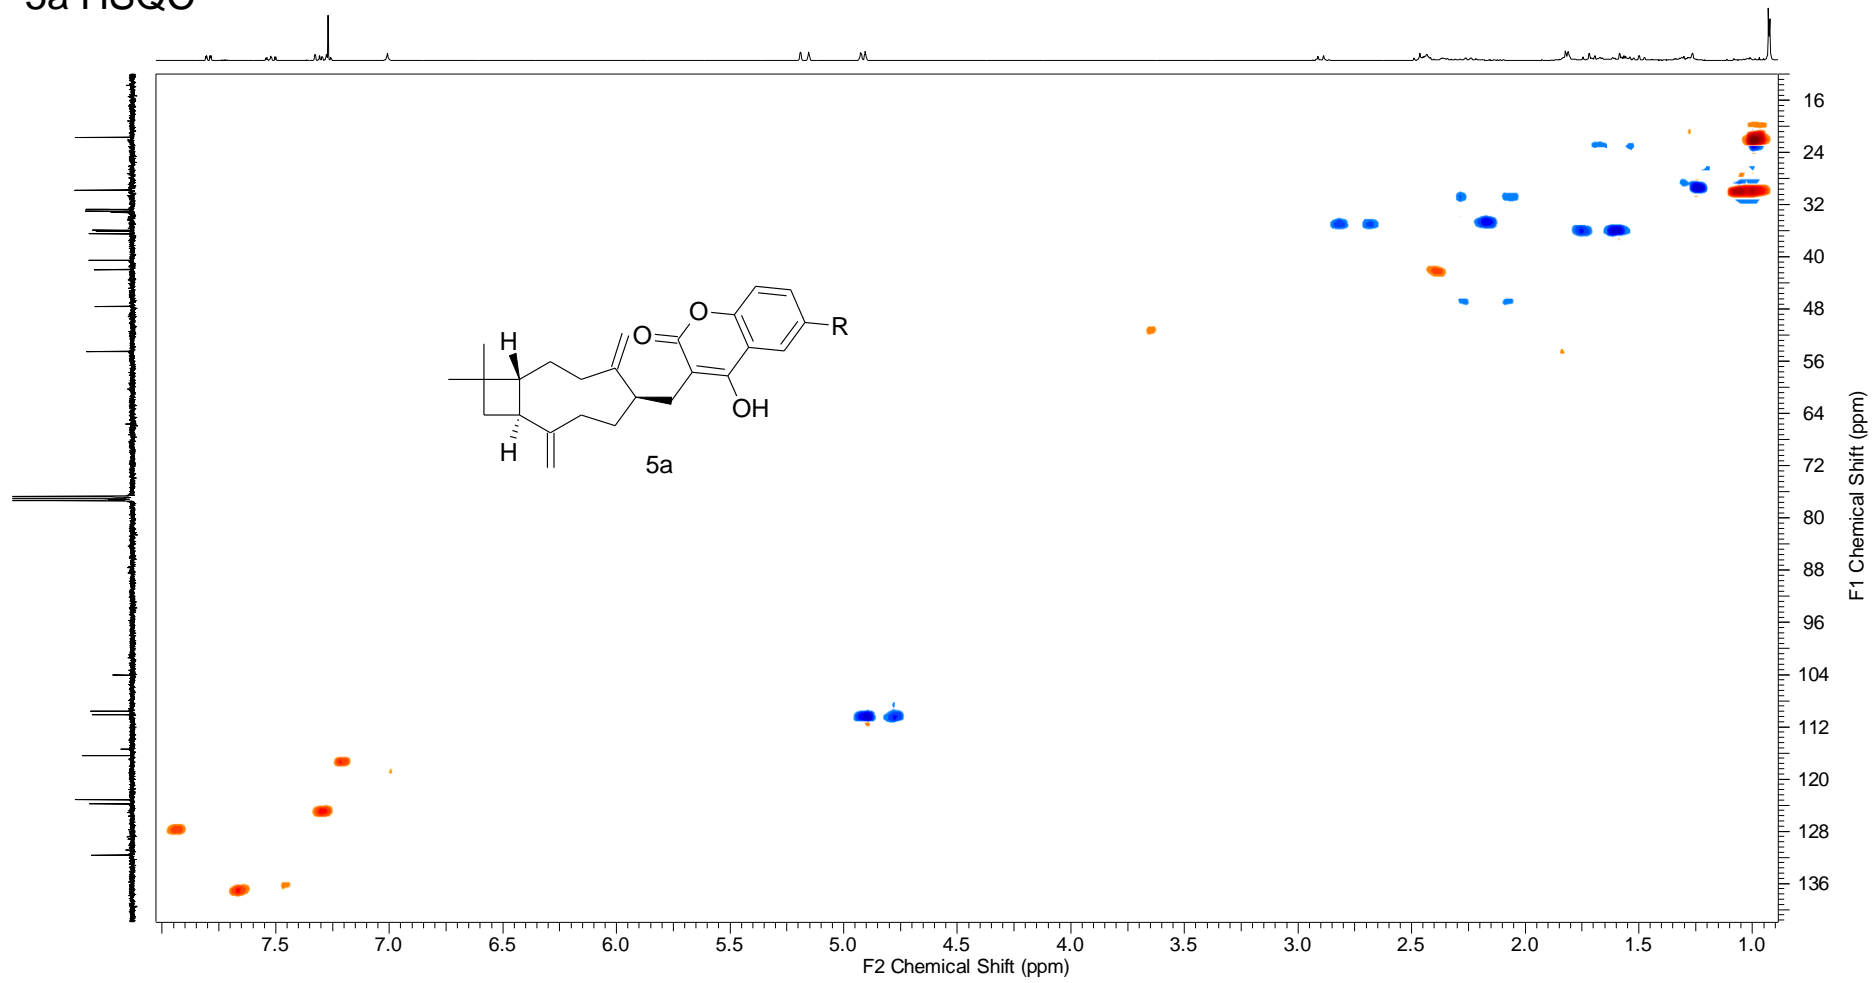

# 5a COSY

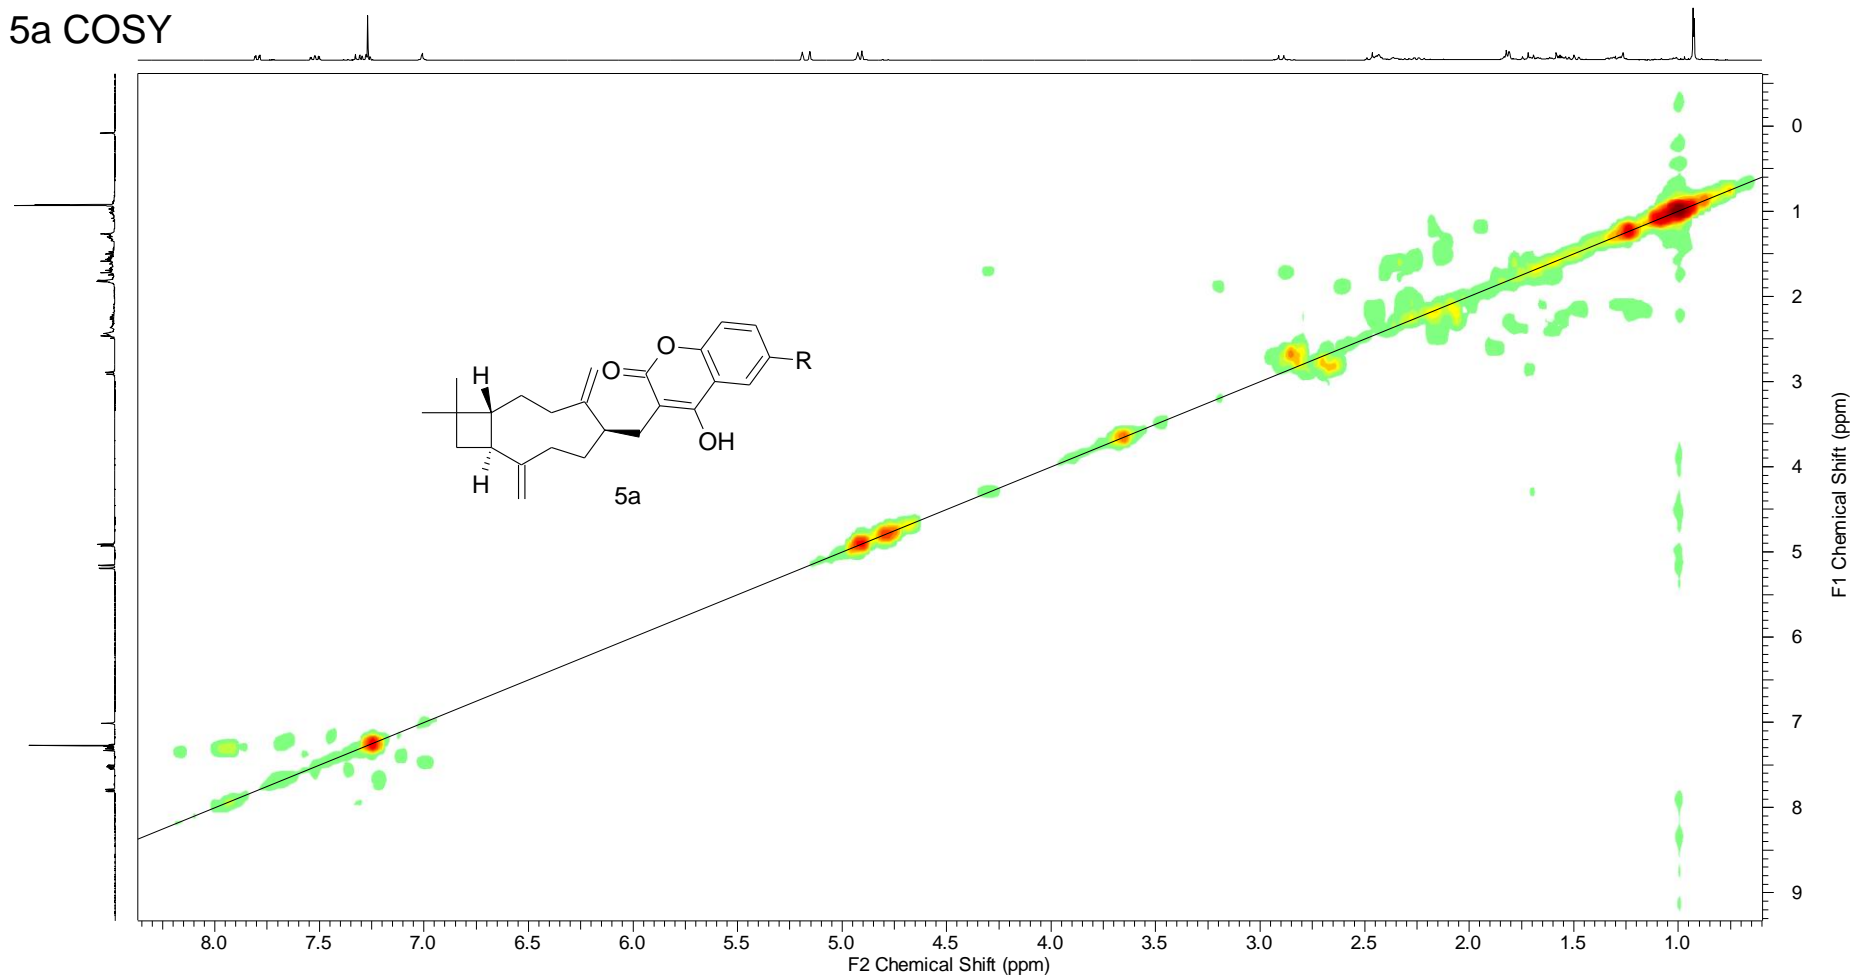

# 5a HMBC

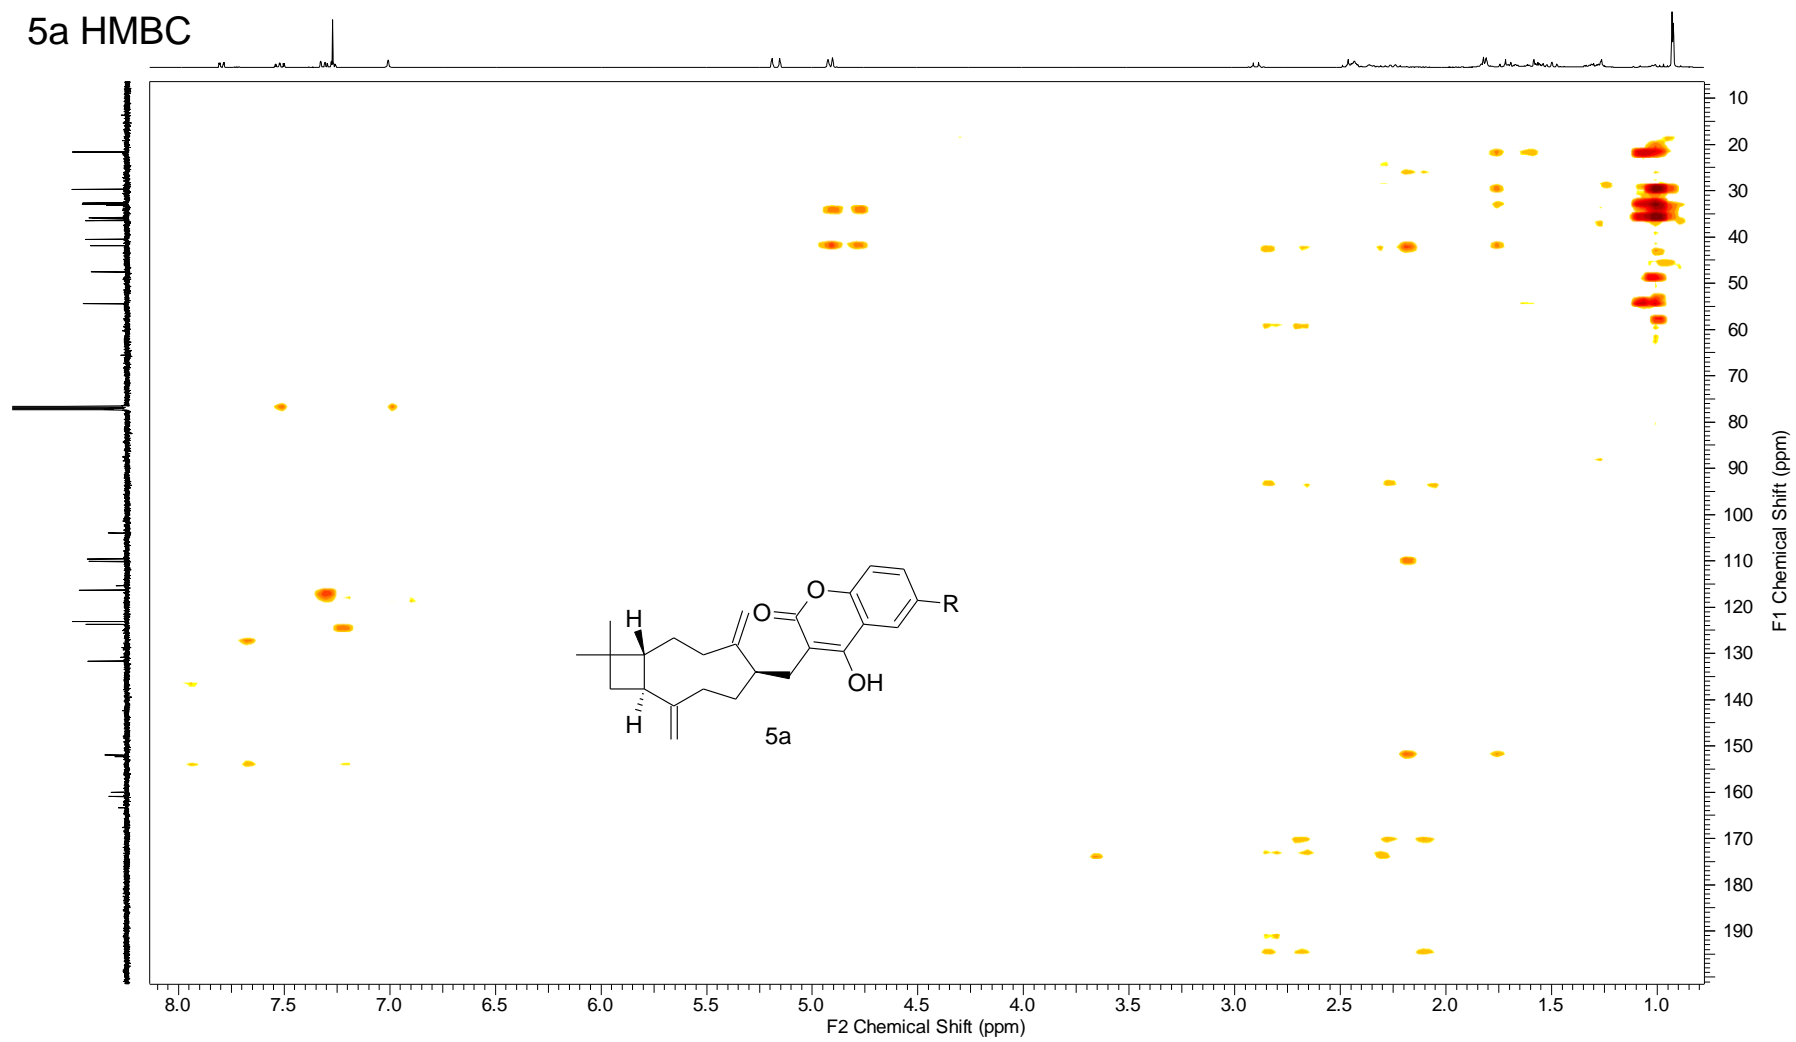

# 5a NOESY

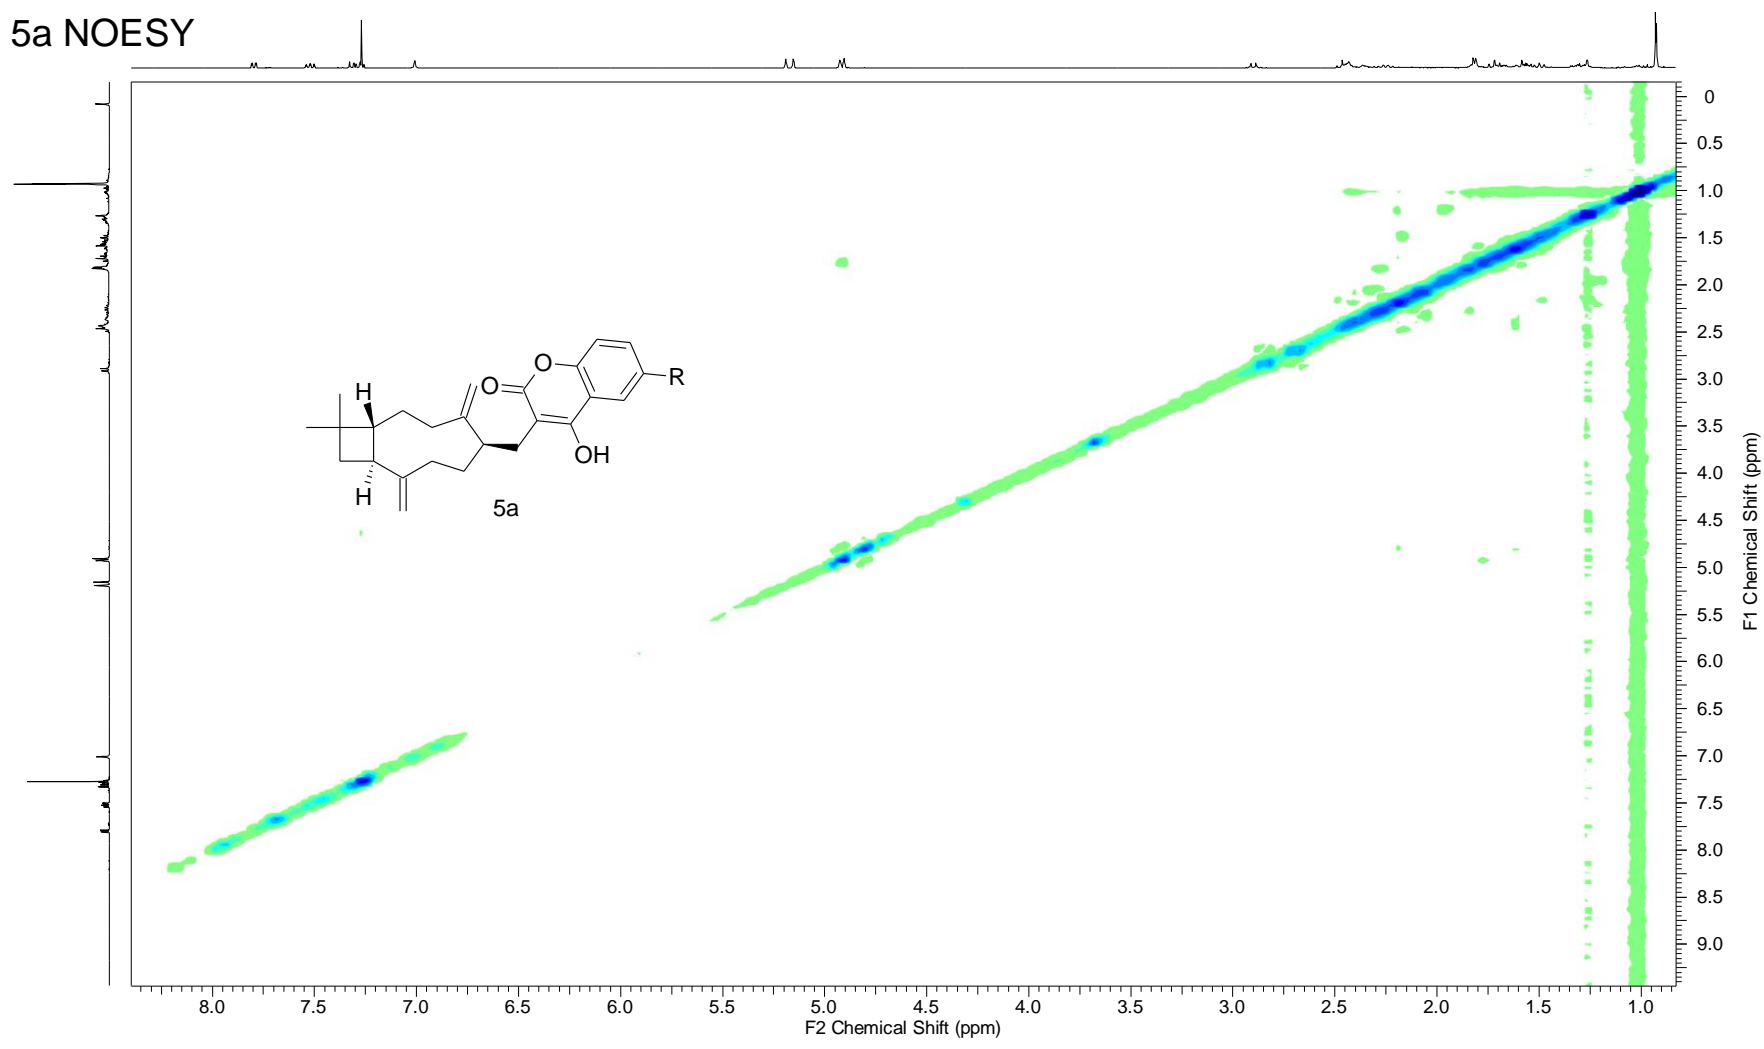

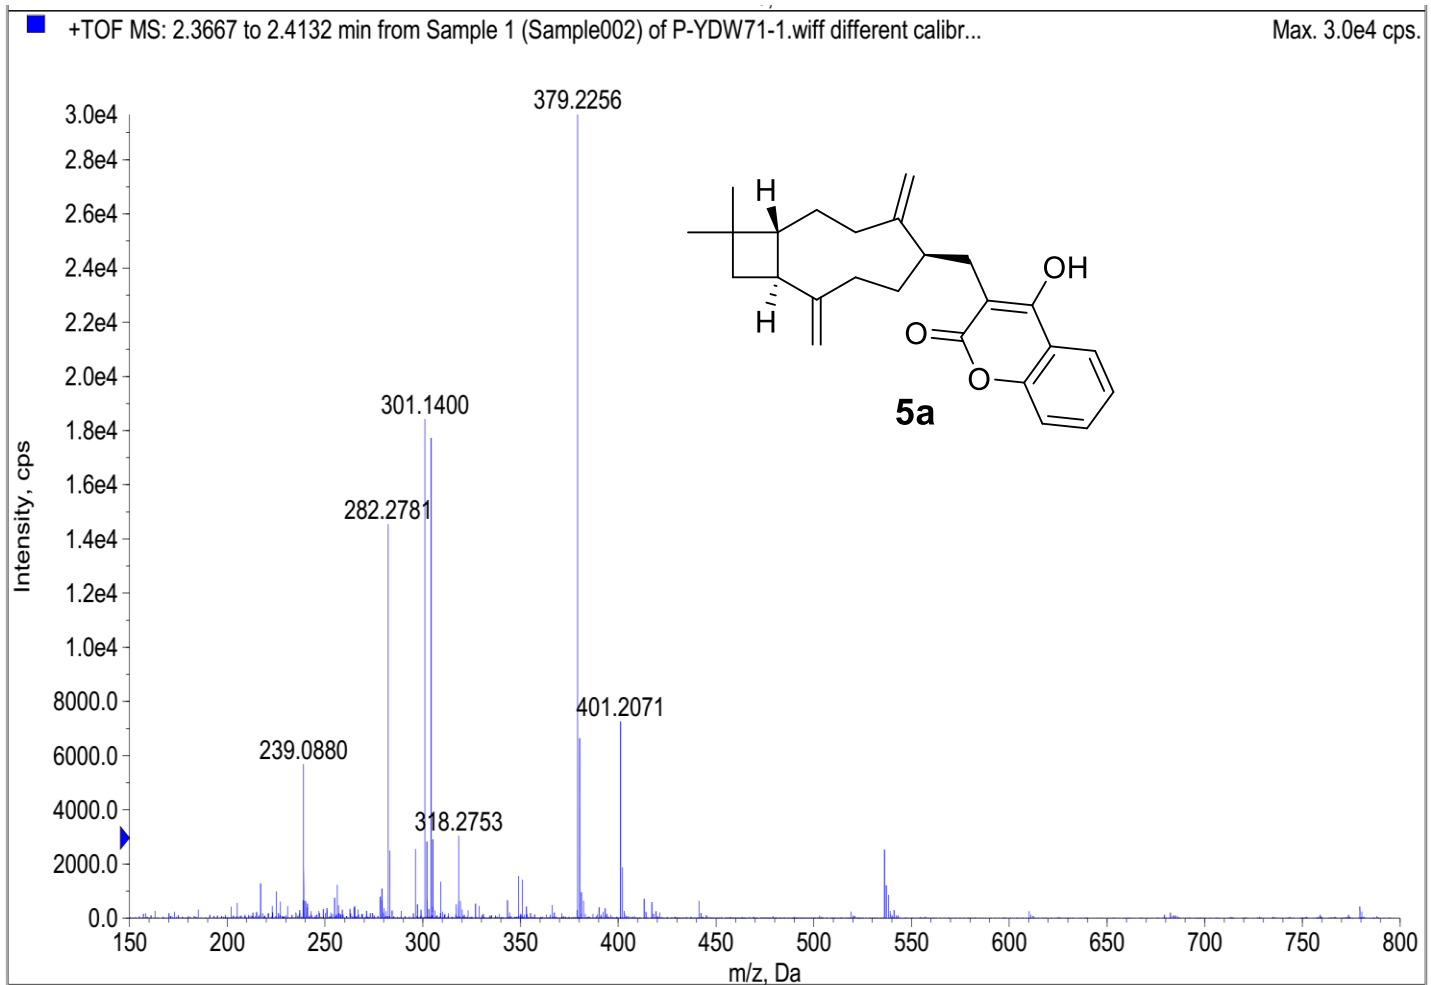

# Compound 1b

## 1b <sup>1</sup>H NMR

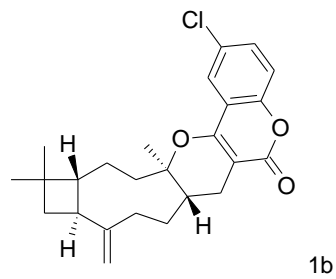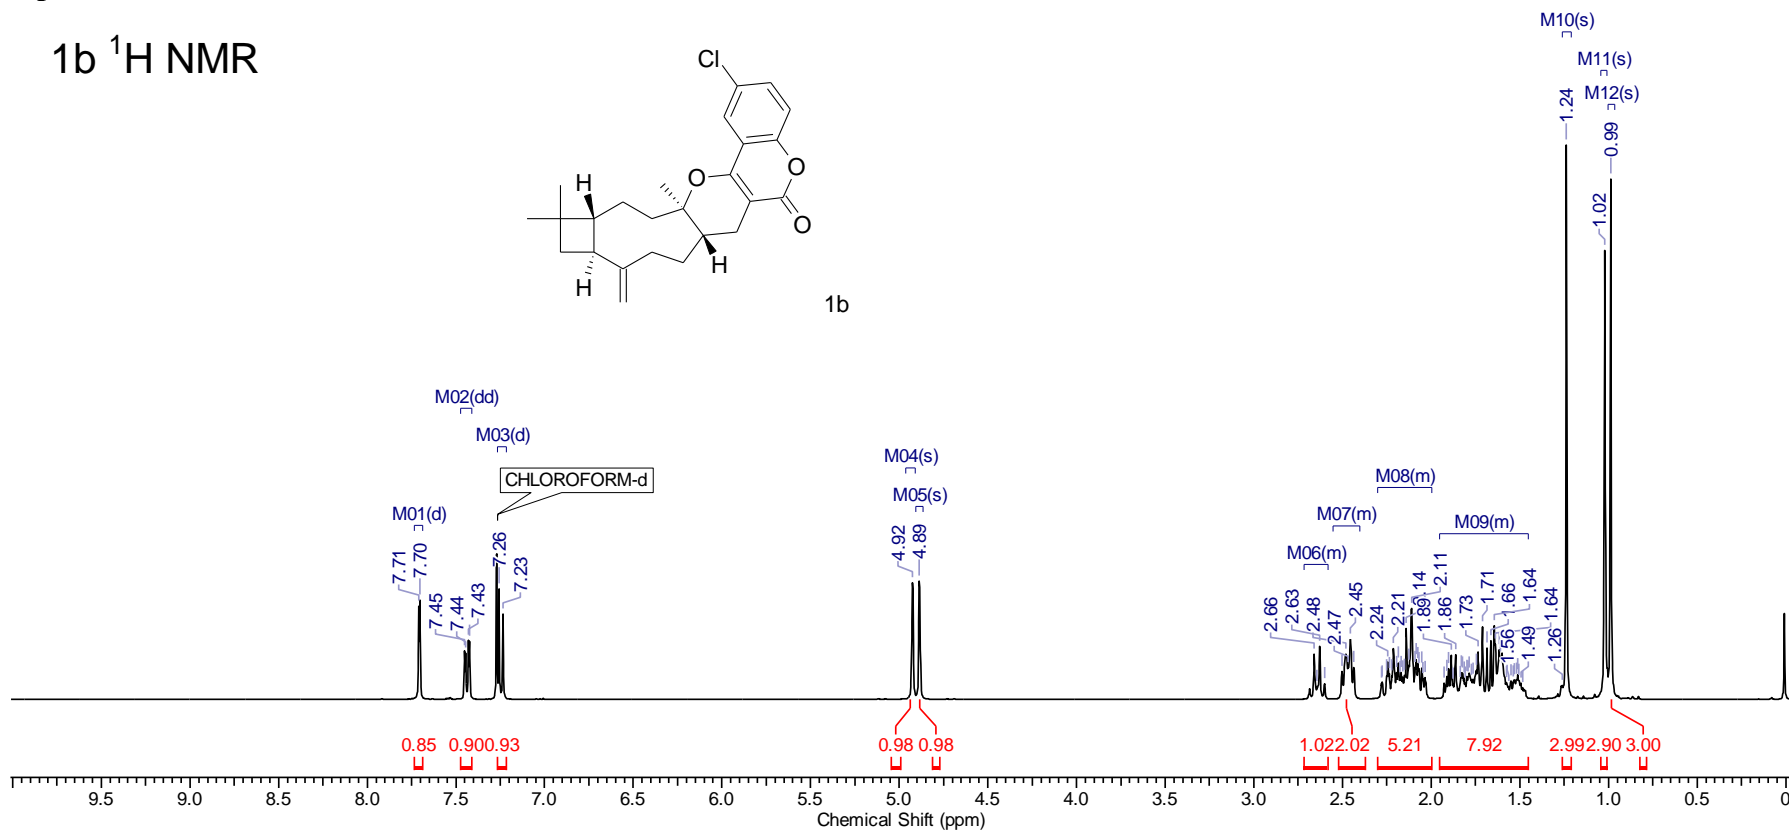

DEPT135 and 13C NMR

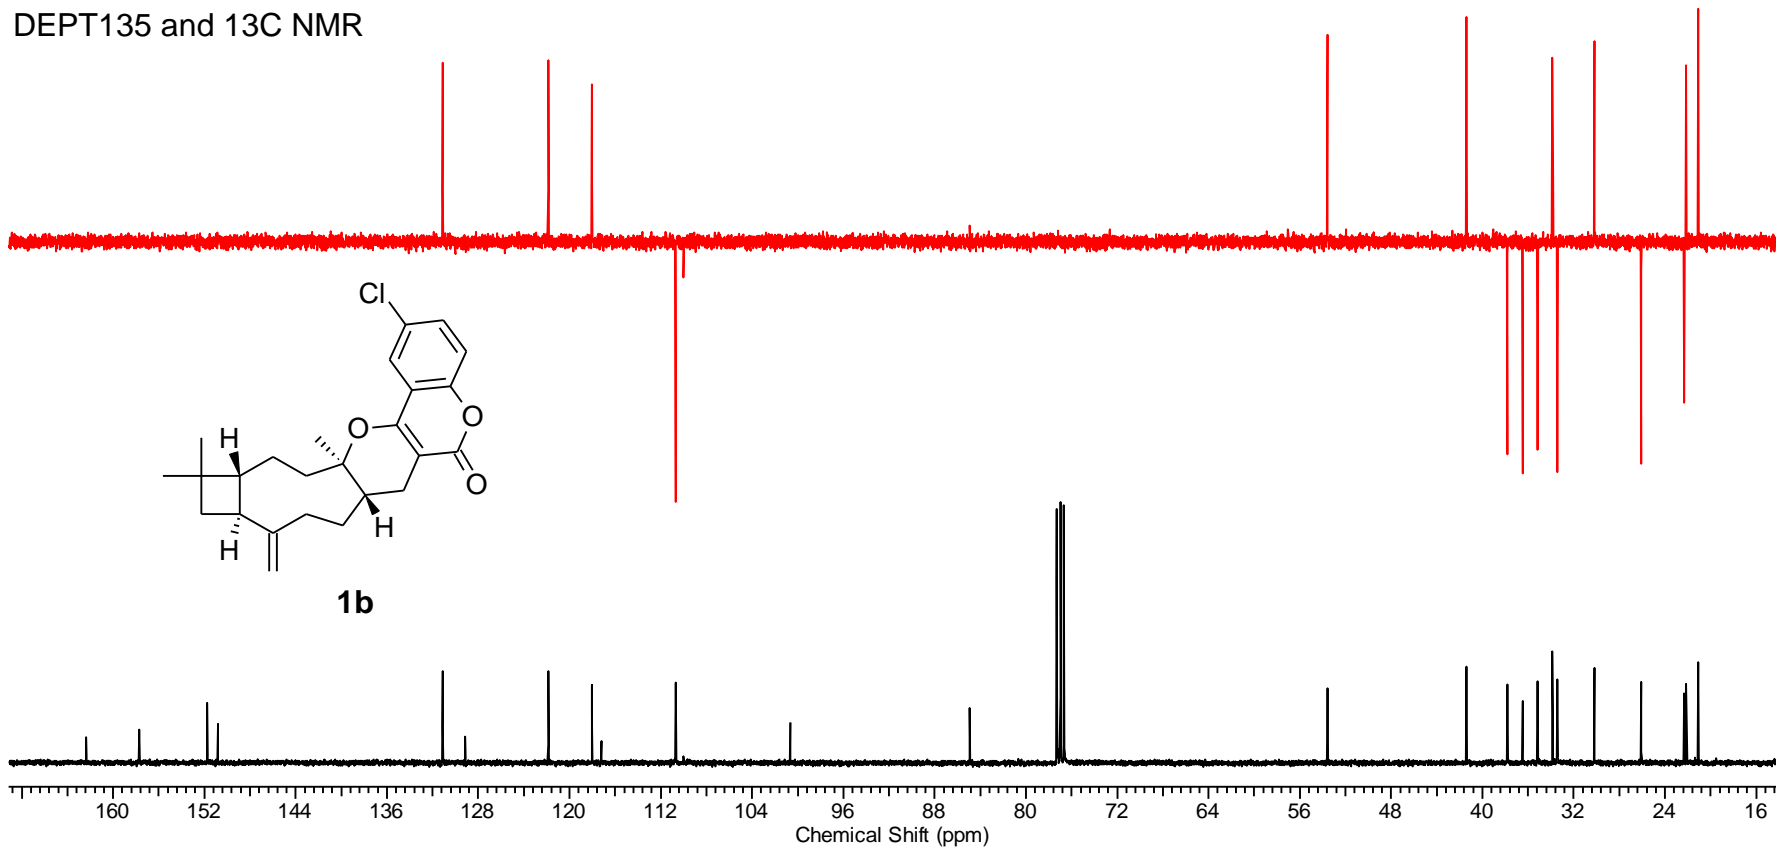



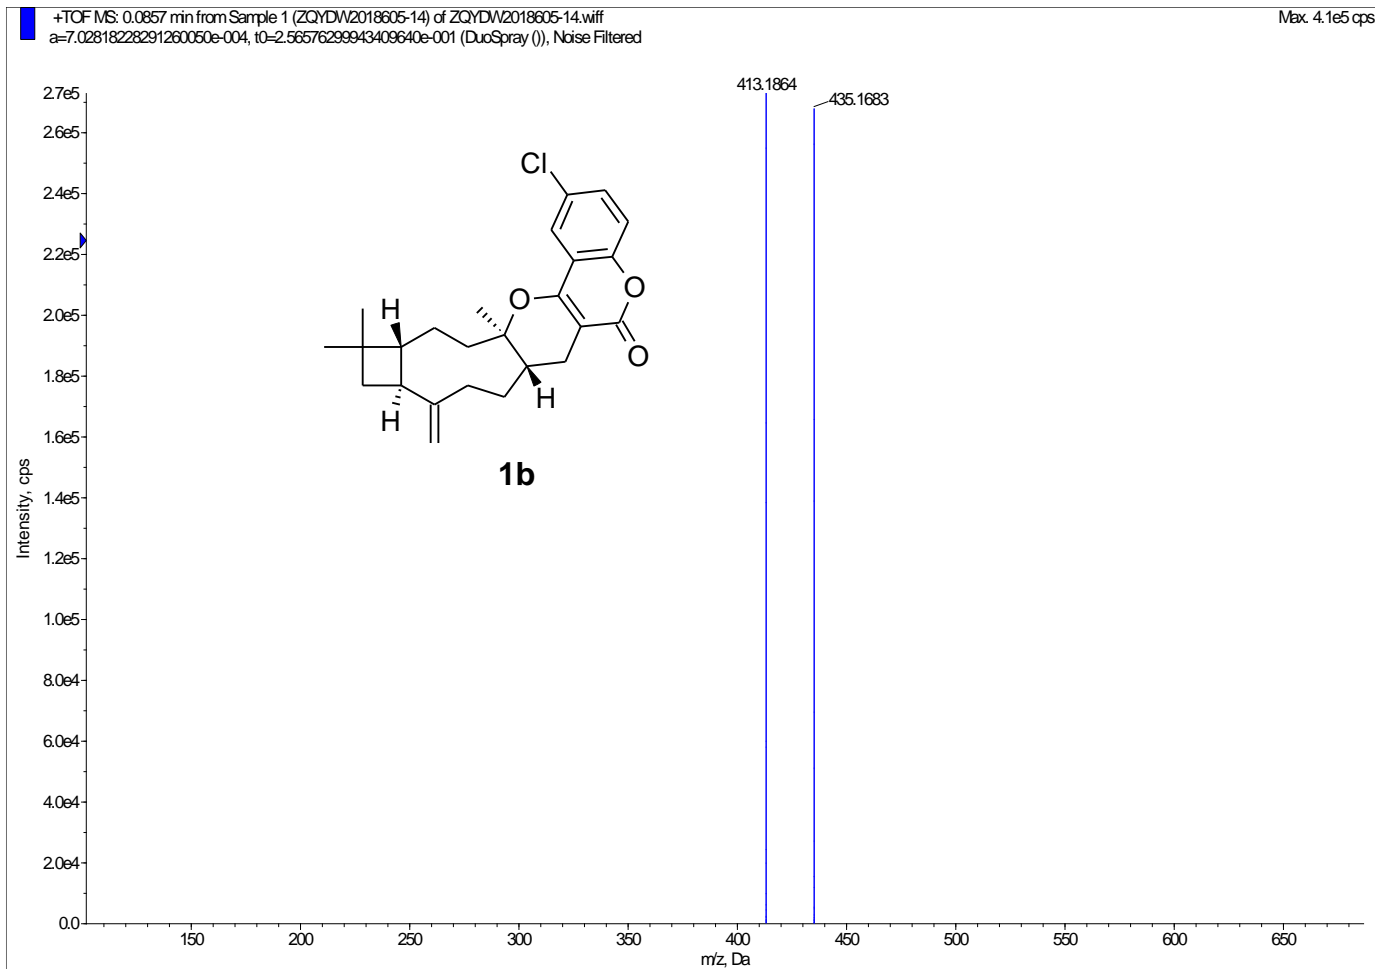

Compound 2b

2b <sup>1</sup>H-NMR

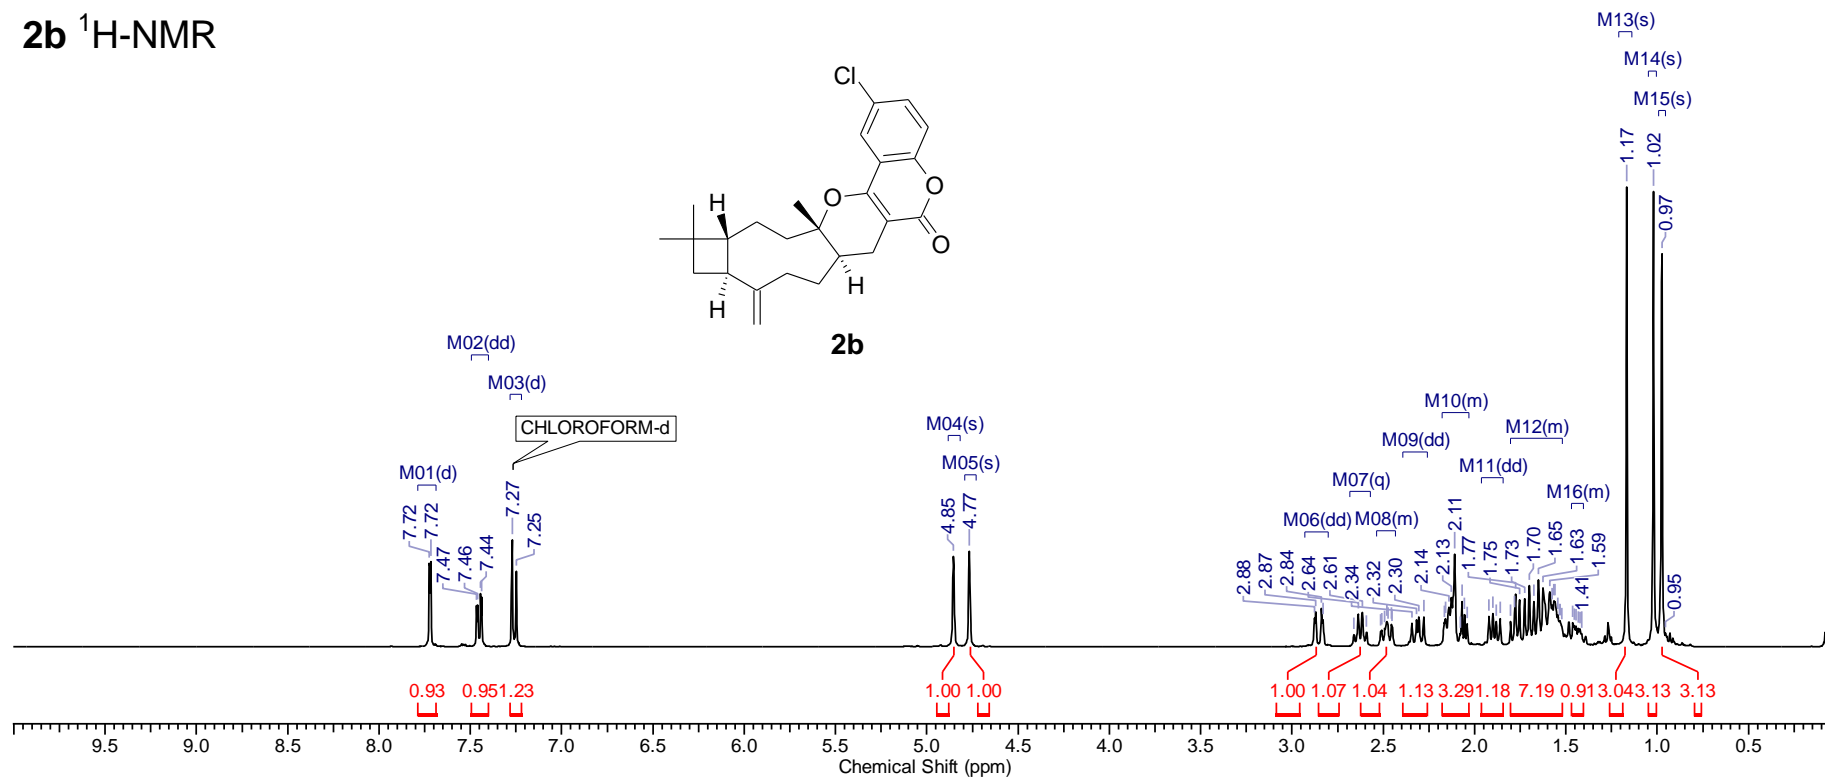

DEPT135 and  $^{13}\text{C}$  NMR

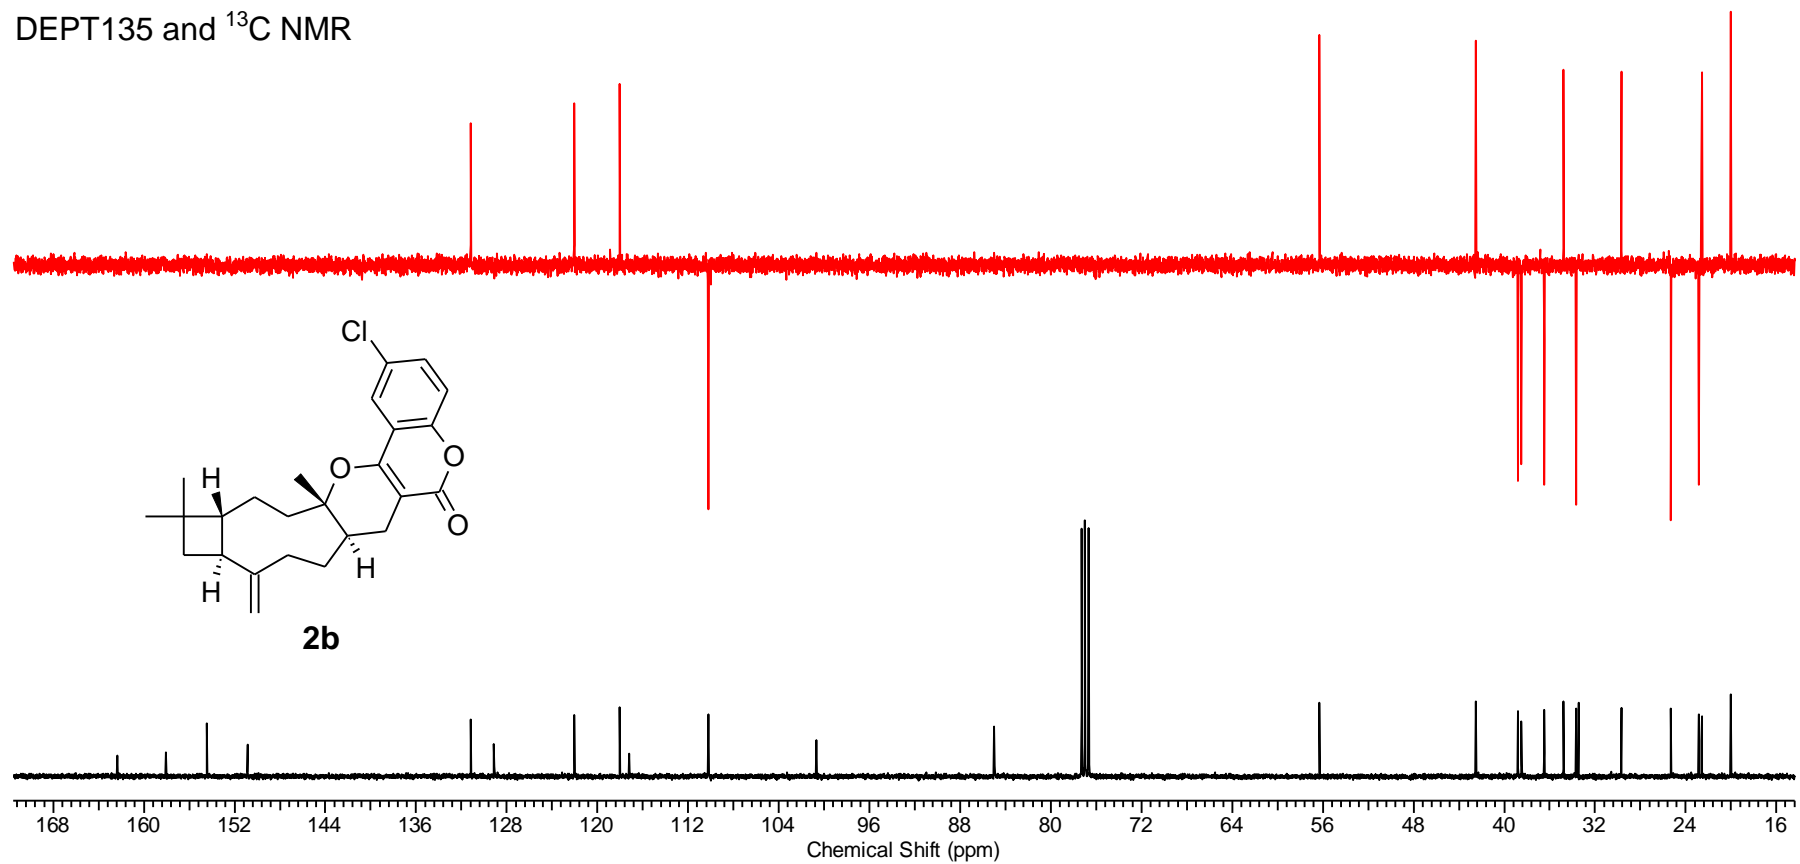



# Compound 3b

## 3b <sup>1</sup>H-NMR

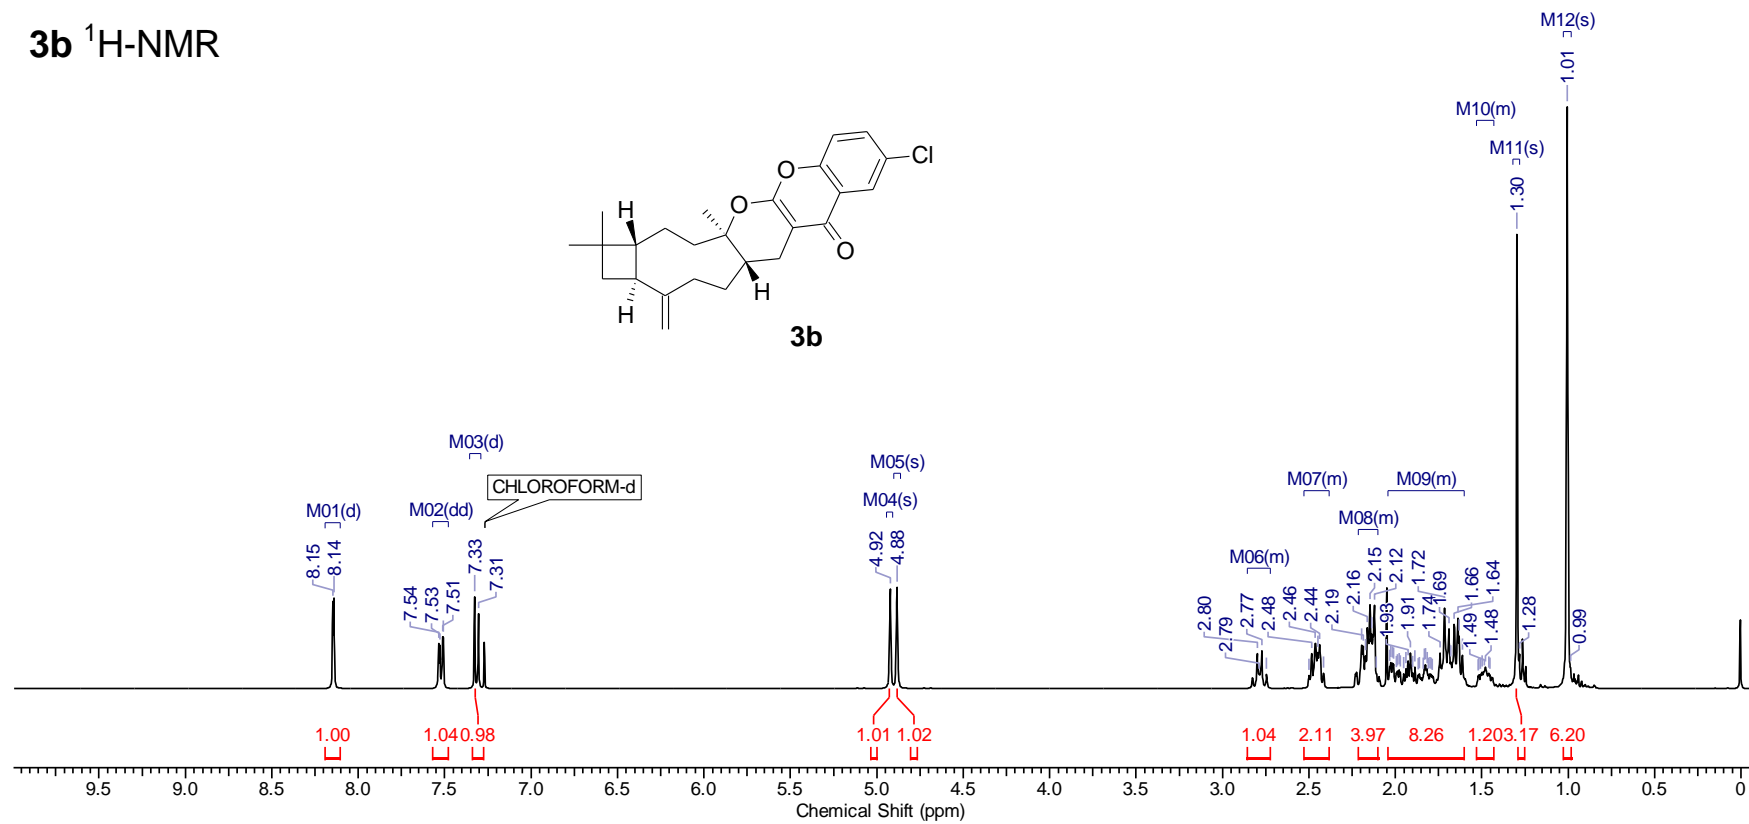

DEPT135 and  $^{13}\text{C}$  NMR

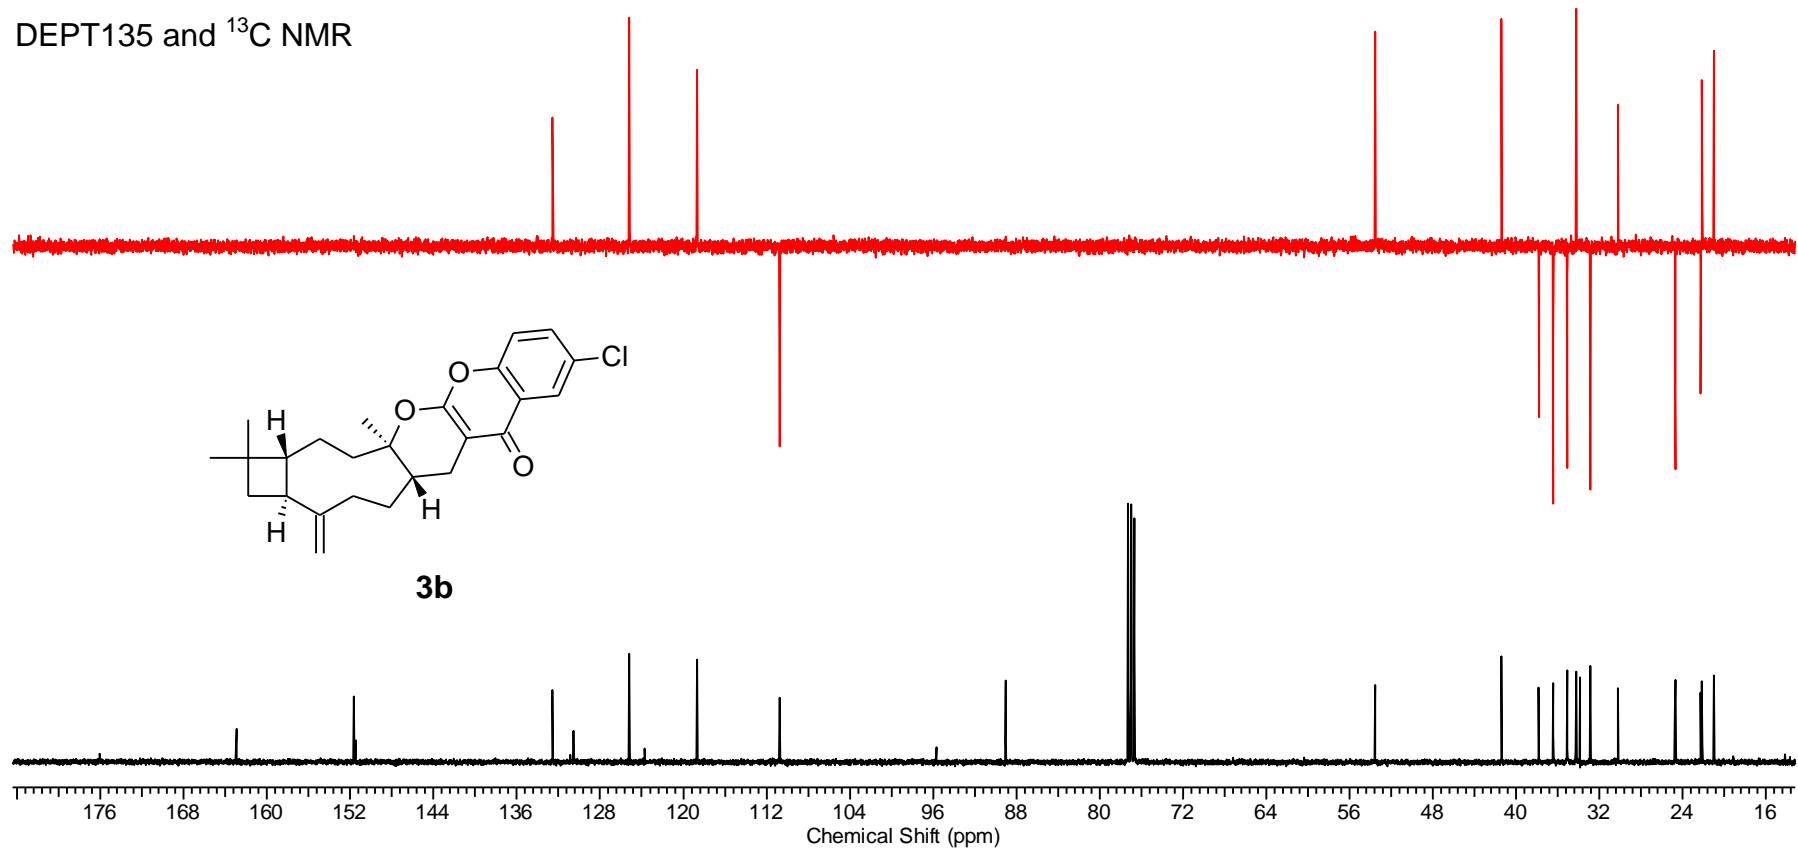

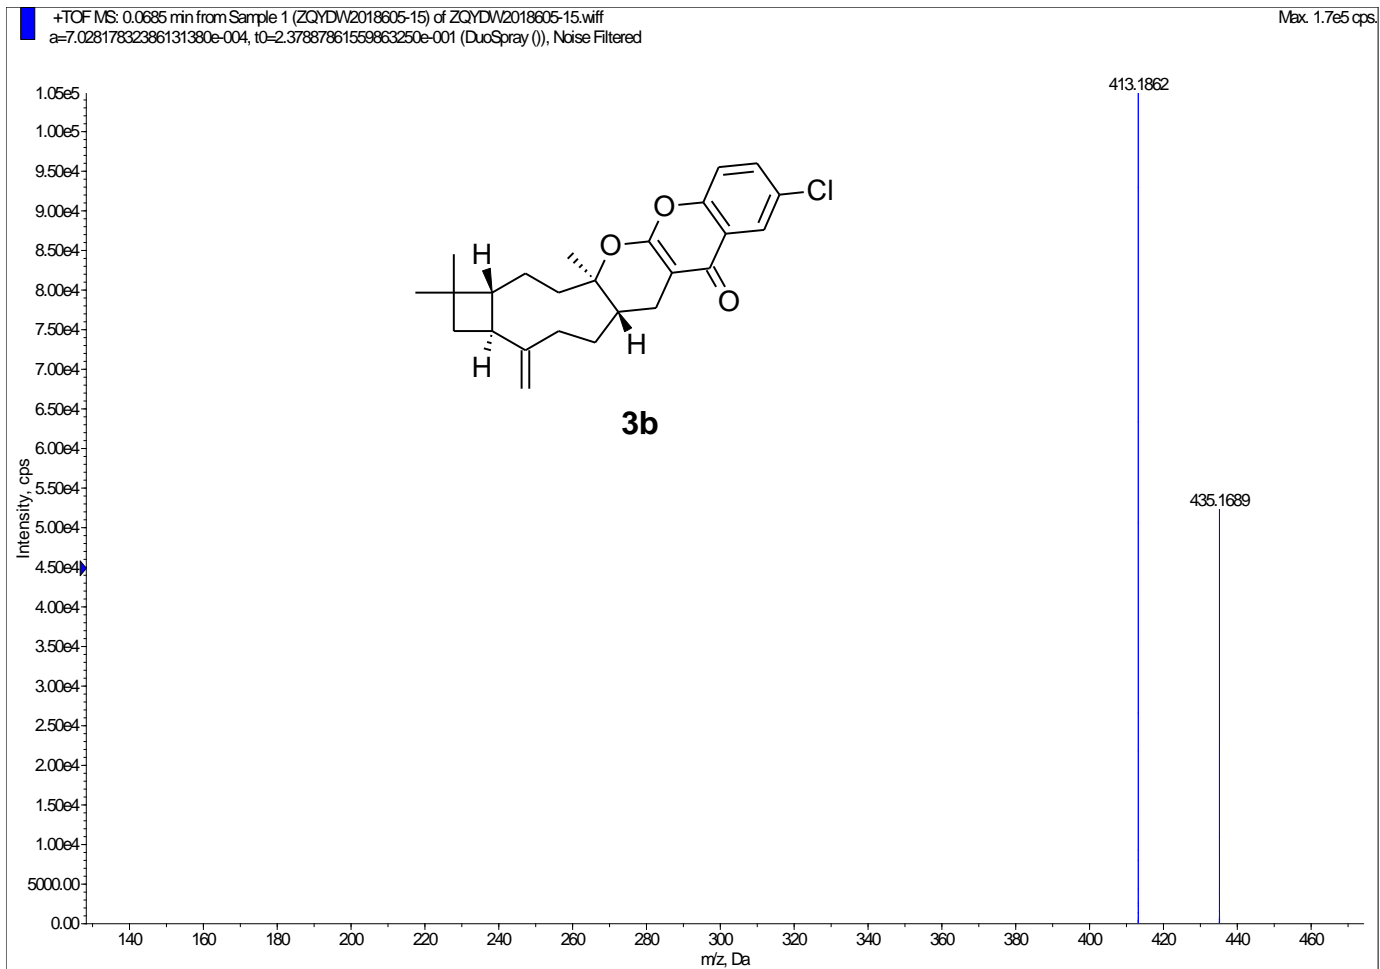

# Compound 4b

## 4b <sup>1</sup>H-NMR

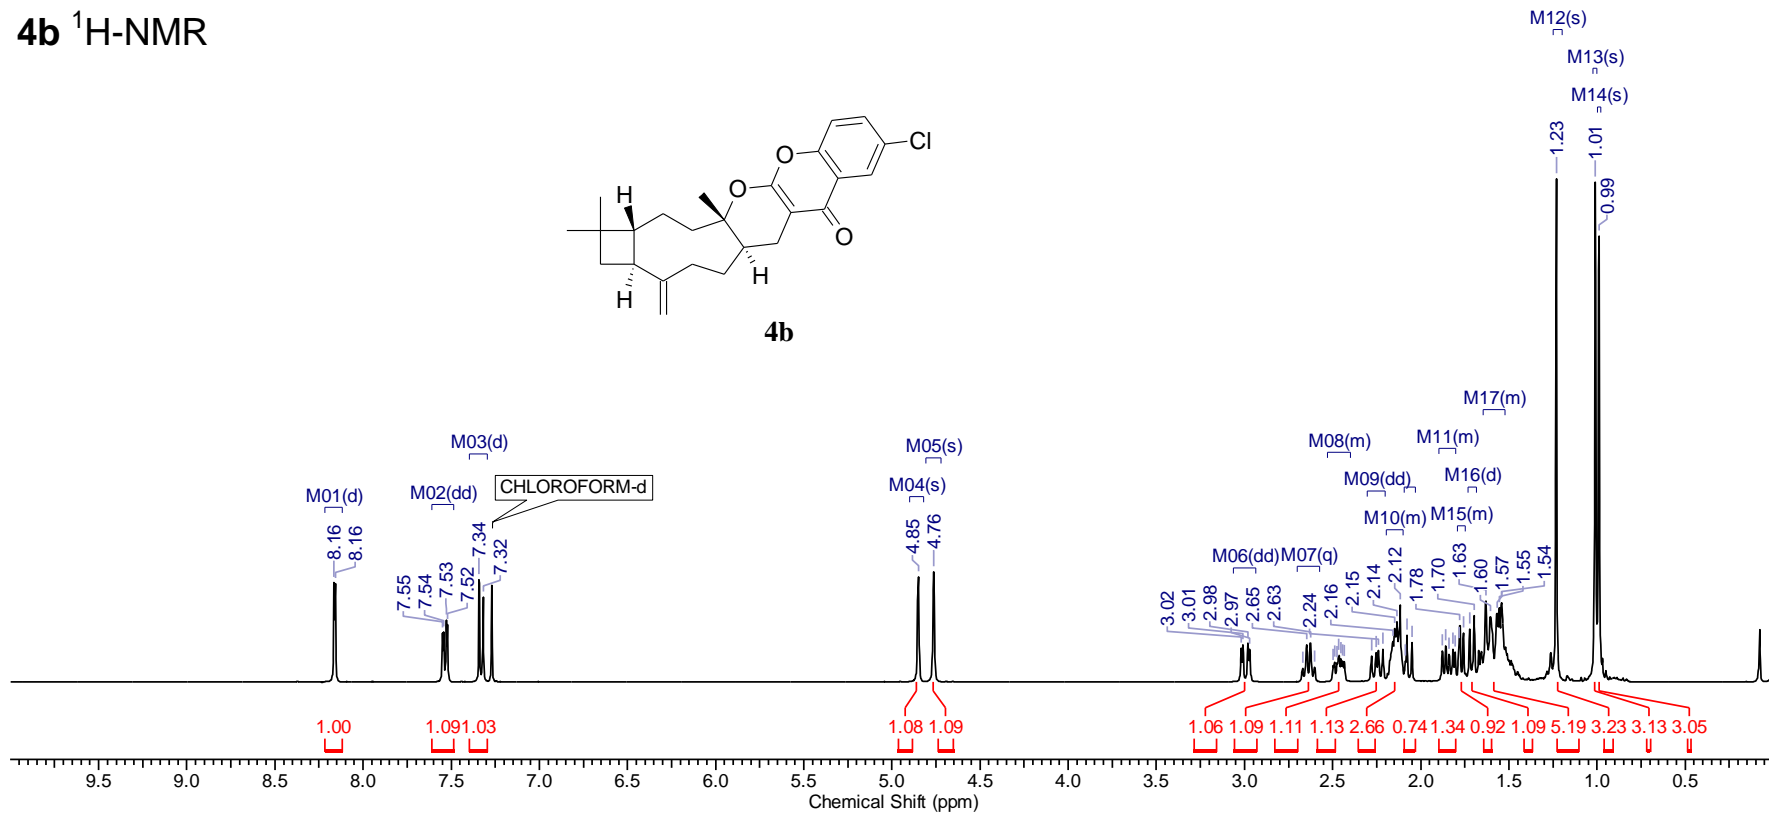



DEPT135 and  $^{13}\text{C}$  NMR

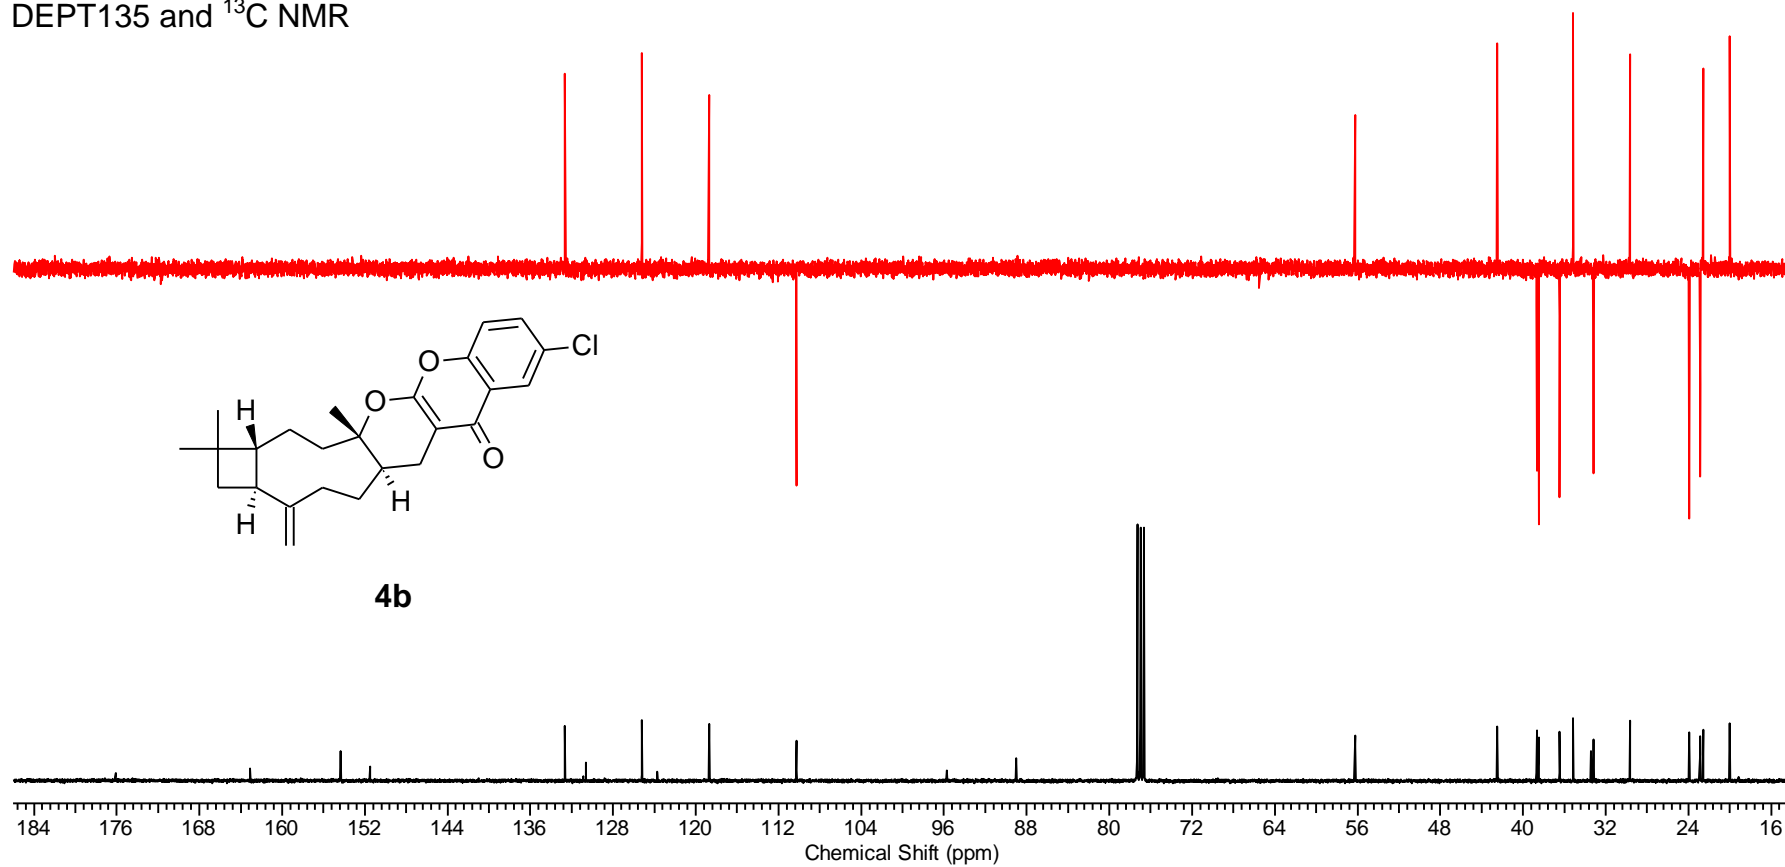

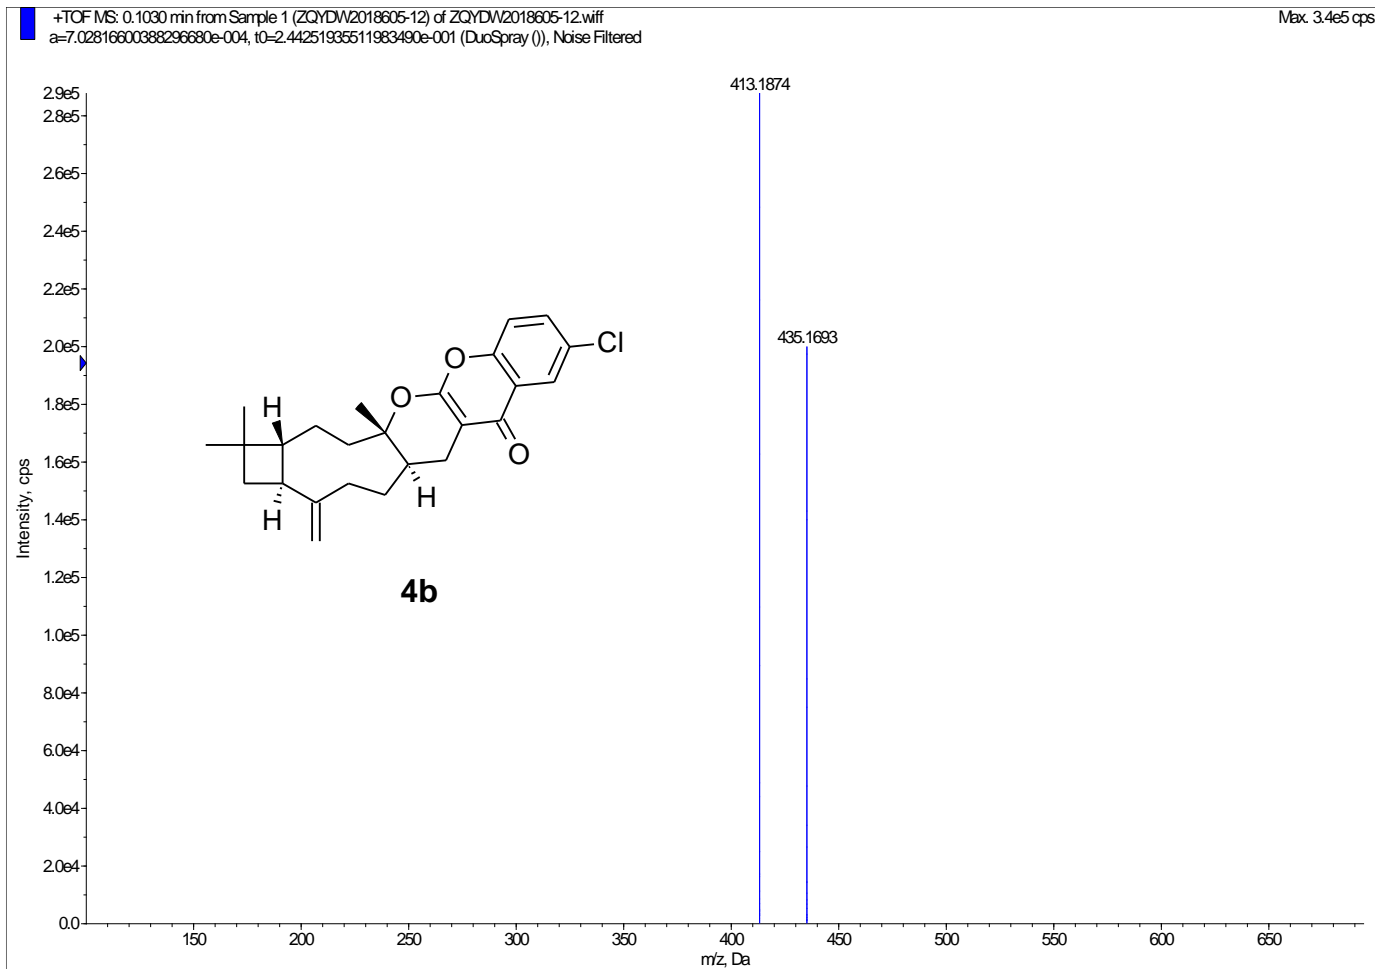

Compound 5b

5b <sup>1</sup>H-NMR

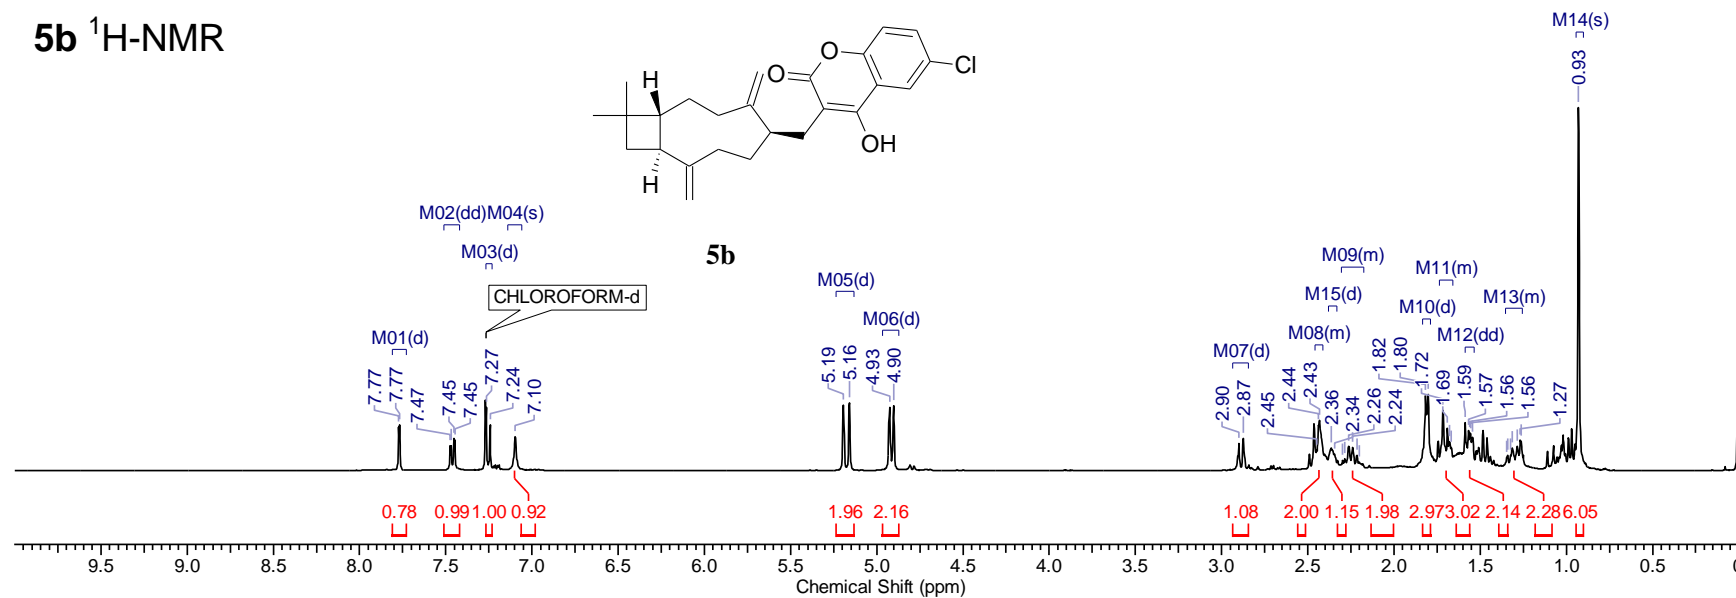

DEPT135 and  $^{13}\text{C}$  NMR

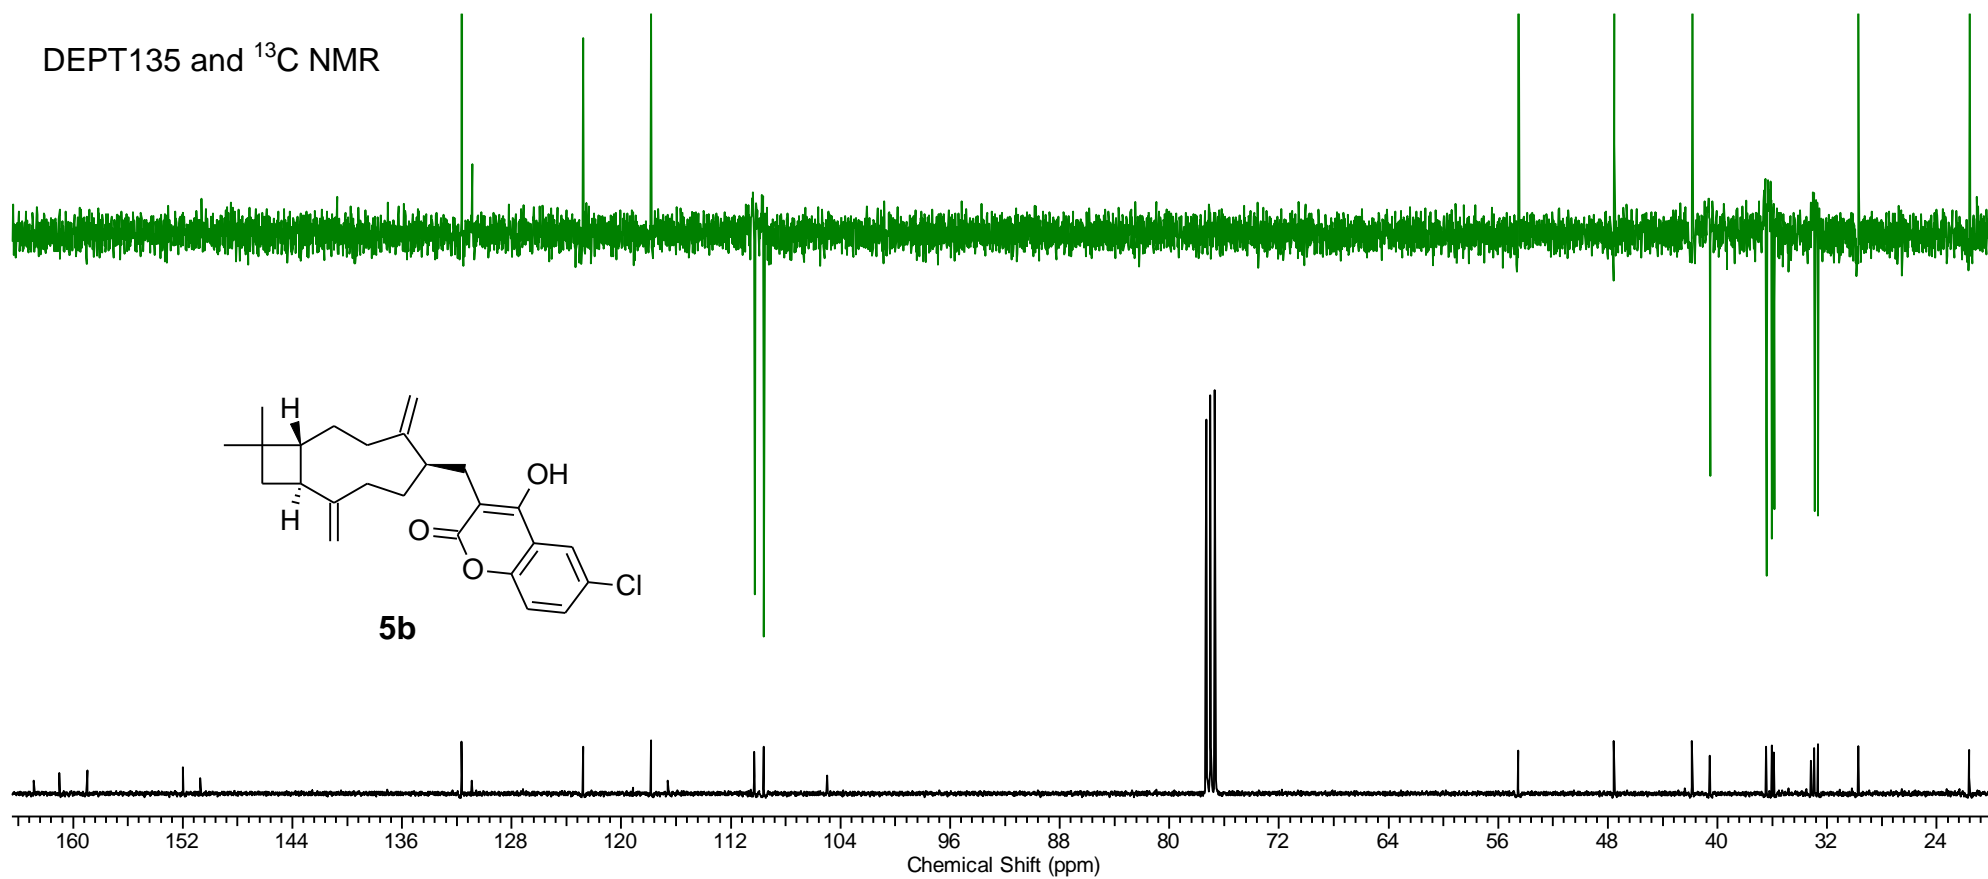

+TOF MS: 0.1029 min from Sample 1 (ZQYDW2018605-16) of ZQYDW2018605-16.wiff  
a=7.02818129725887490e-004, t0=2.29402650139454240e-001 (DuoSpray ())

Max. 4.0e5 cps.

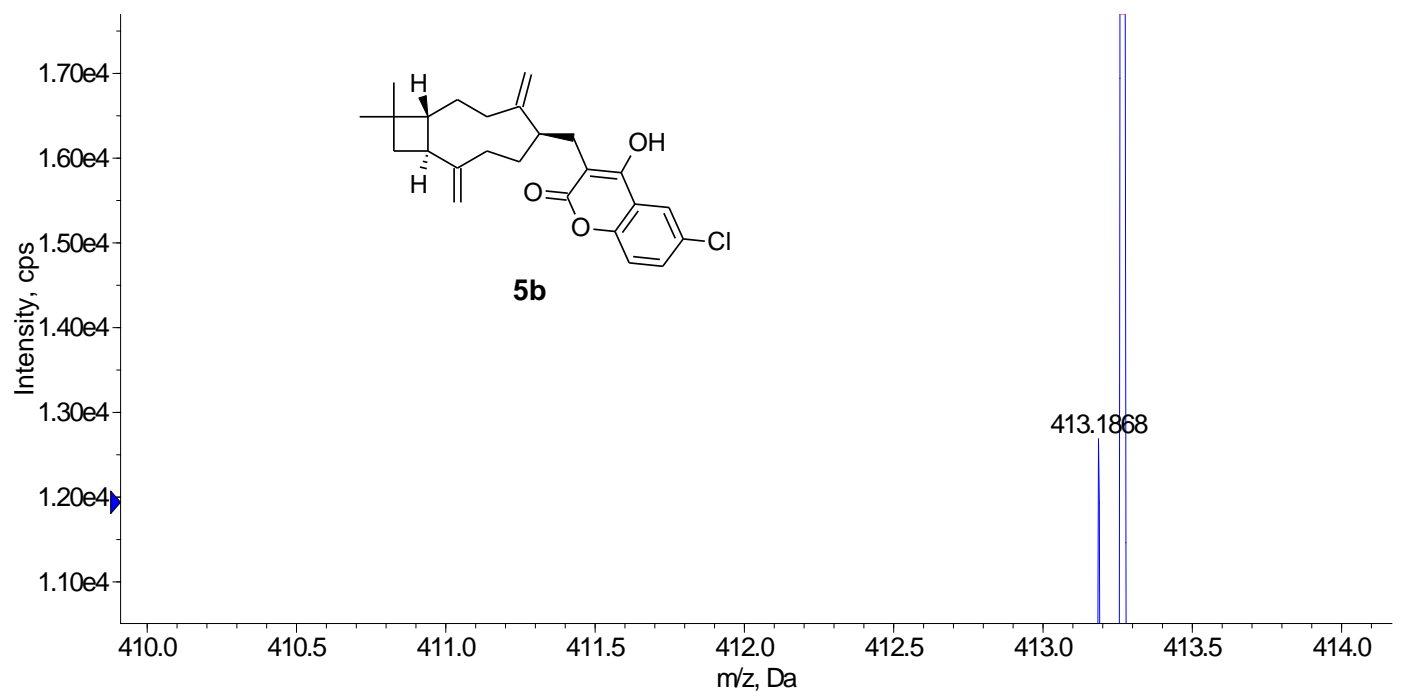

# Compound 1c

## 1c <sup>1</sup>H-NMR

YDW84-3 H.ESP

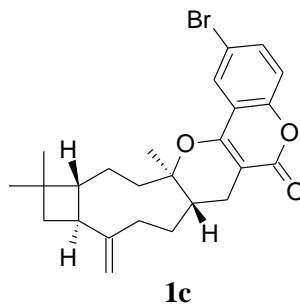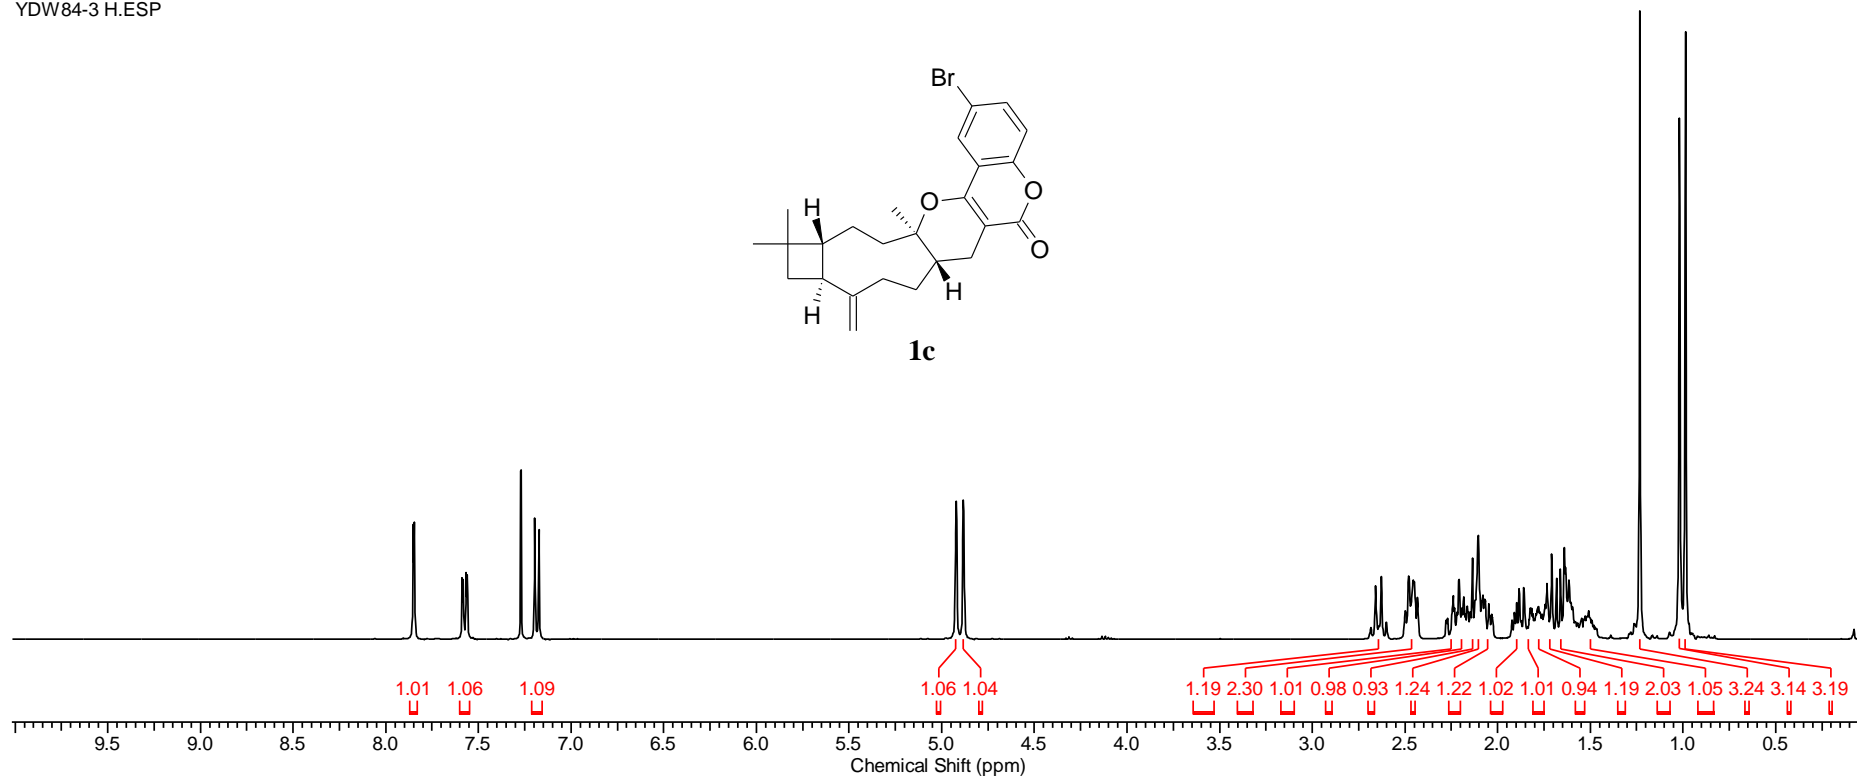

DEPT135 and  $^{13}\text{C}$  NMR

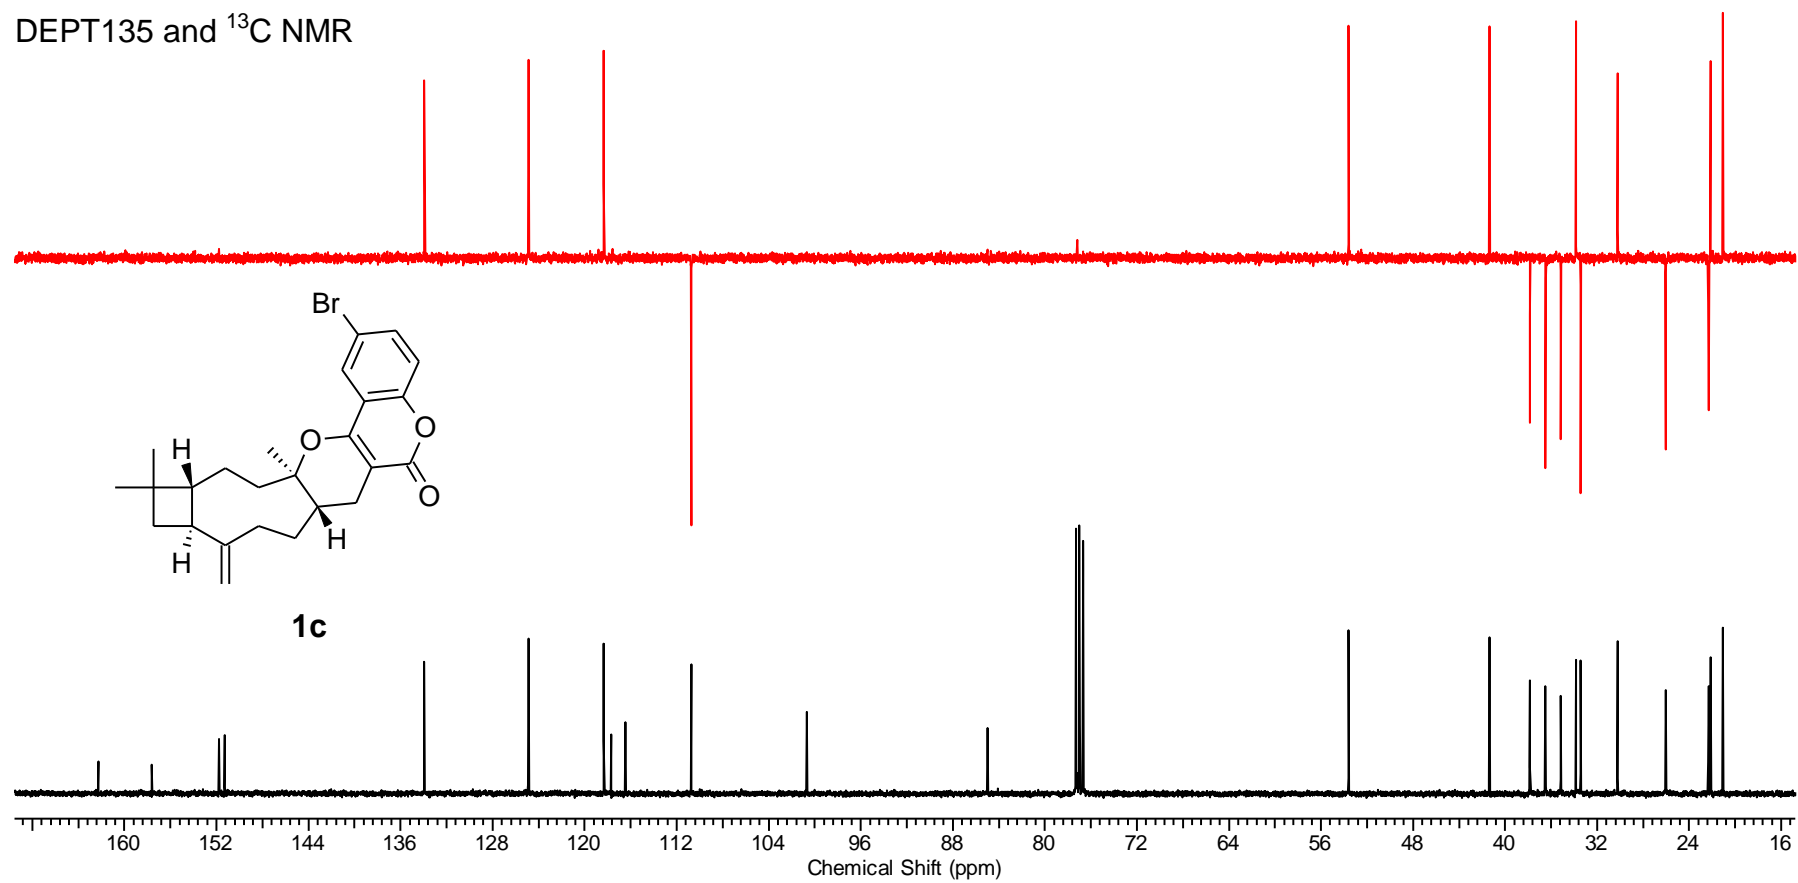

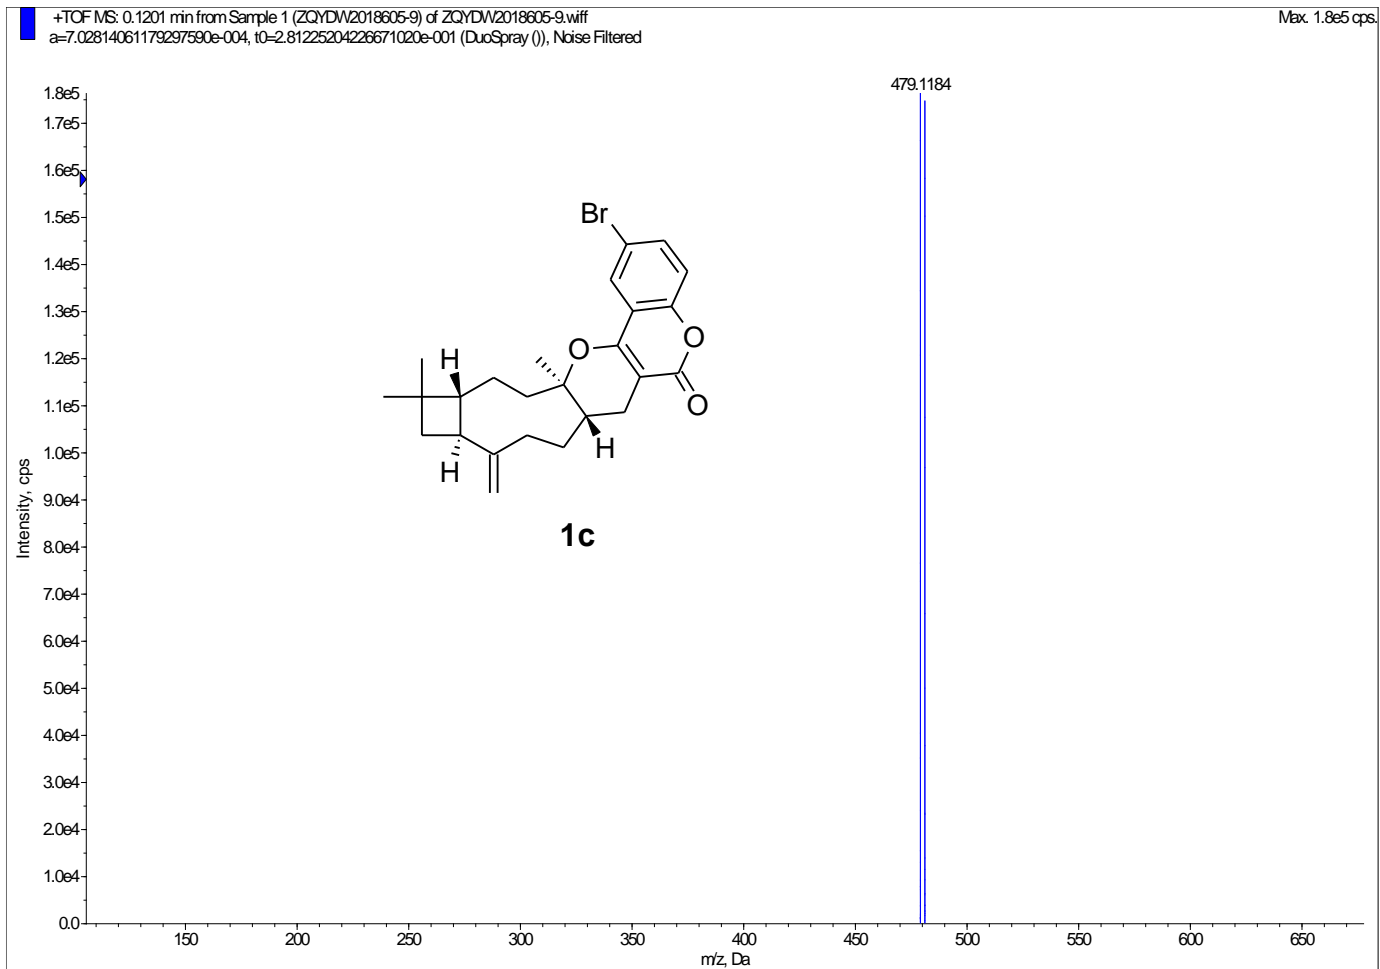



Compound 2c

2c <sup>1</sup>H-NMR

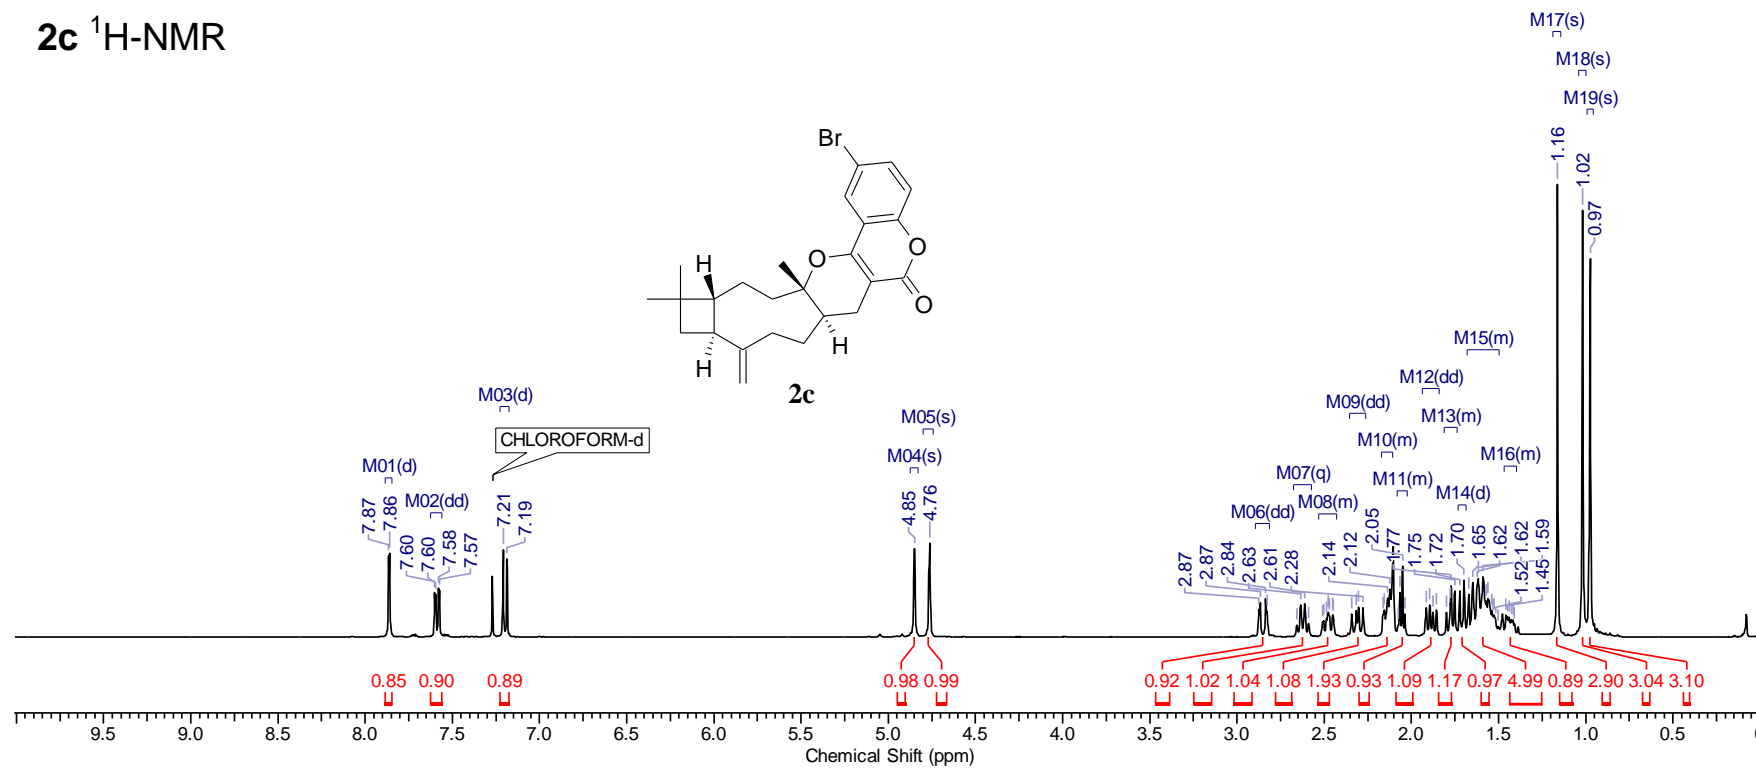

DEPT135 and 13C NMR

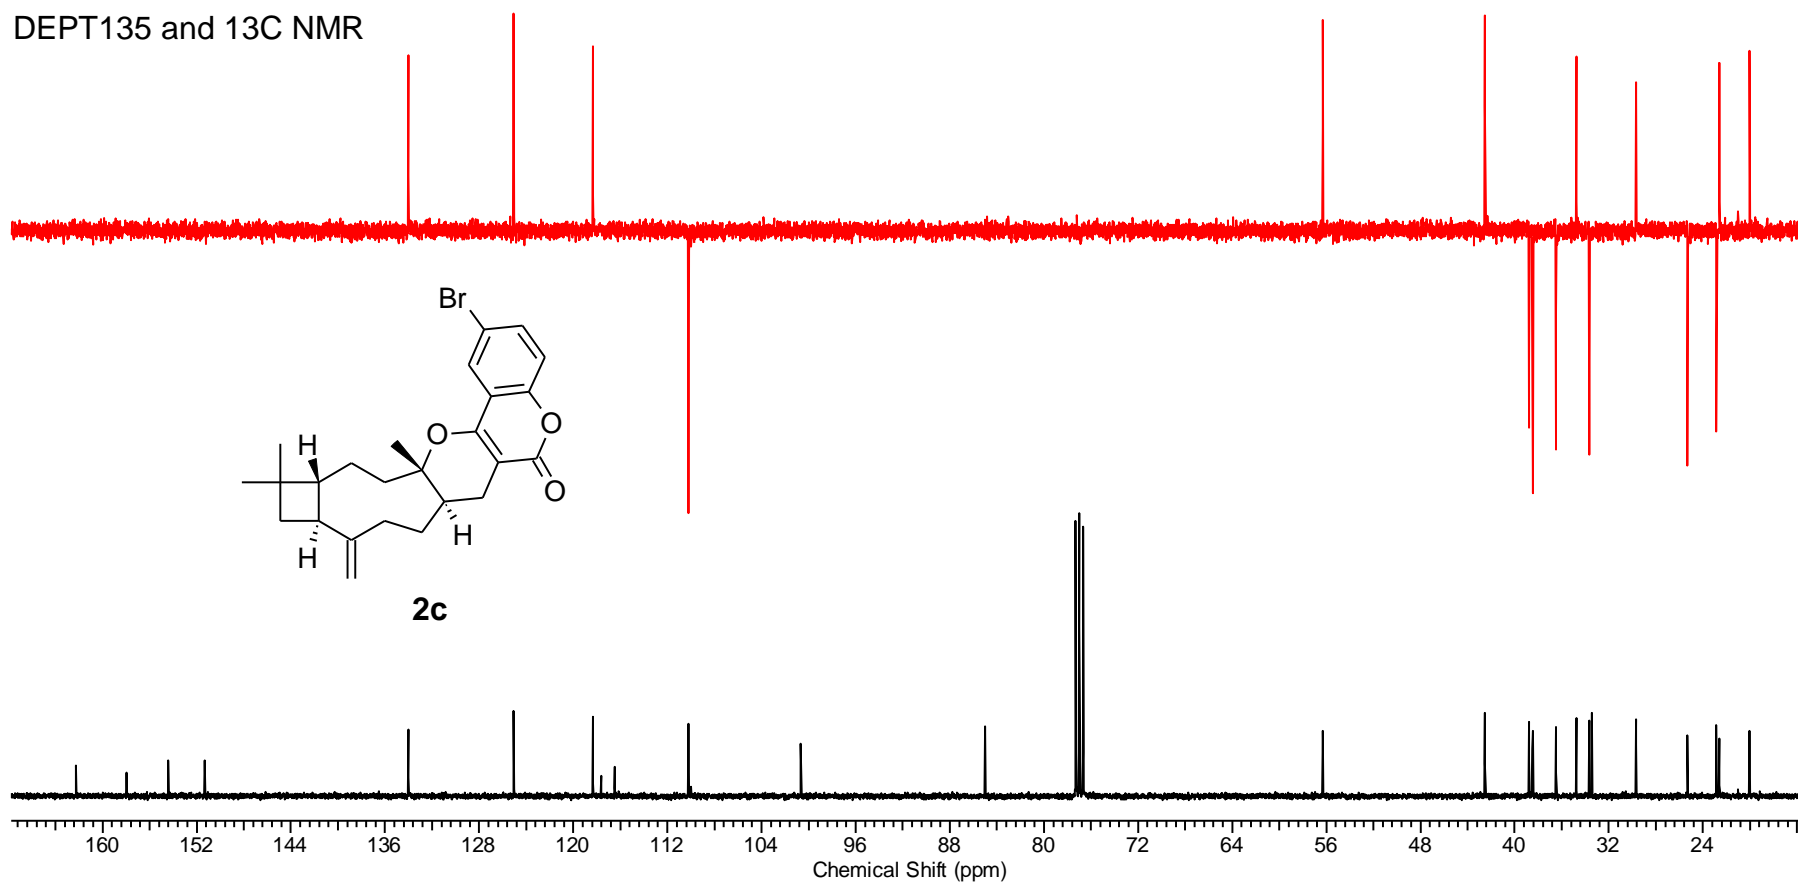

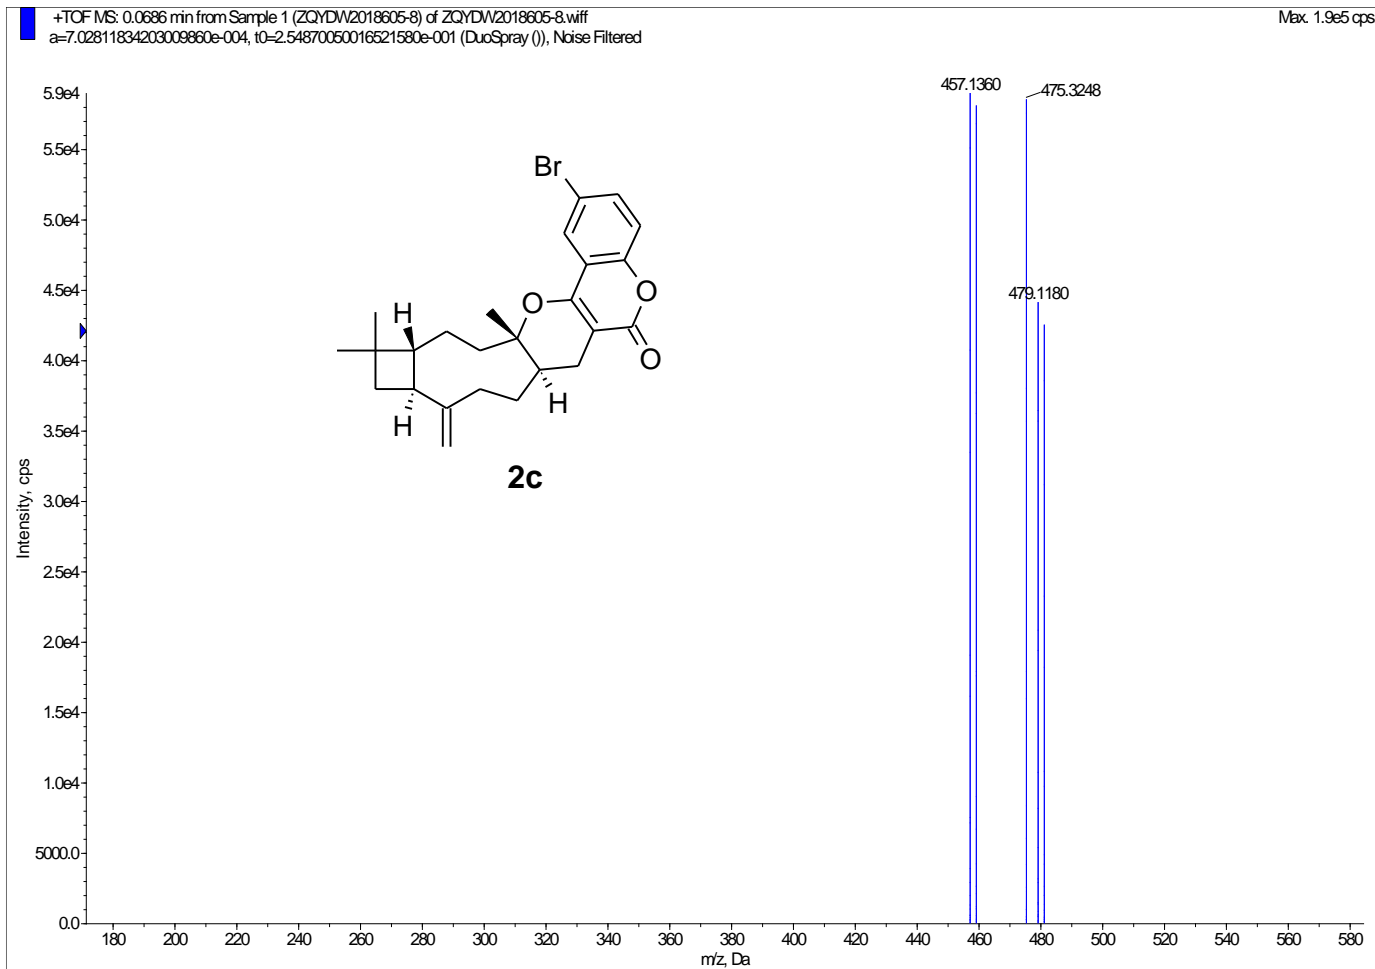

# Compound 3c

## 3c <sup>1</sup>H-NMR

YDW84-5 H.ESP

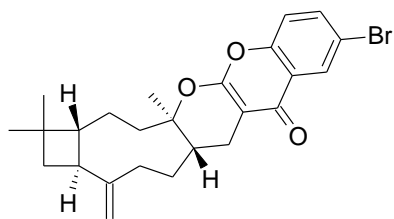

3c

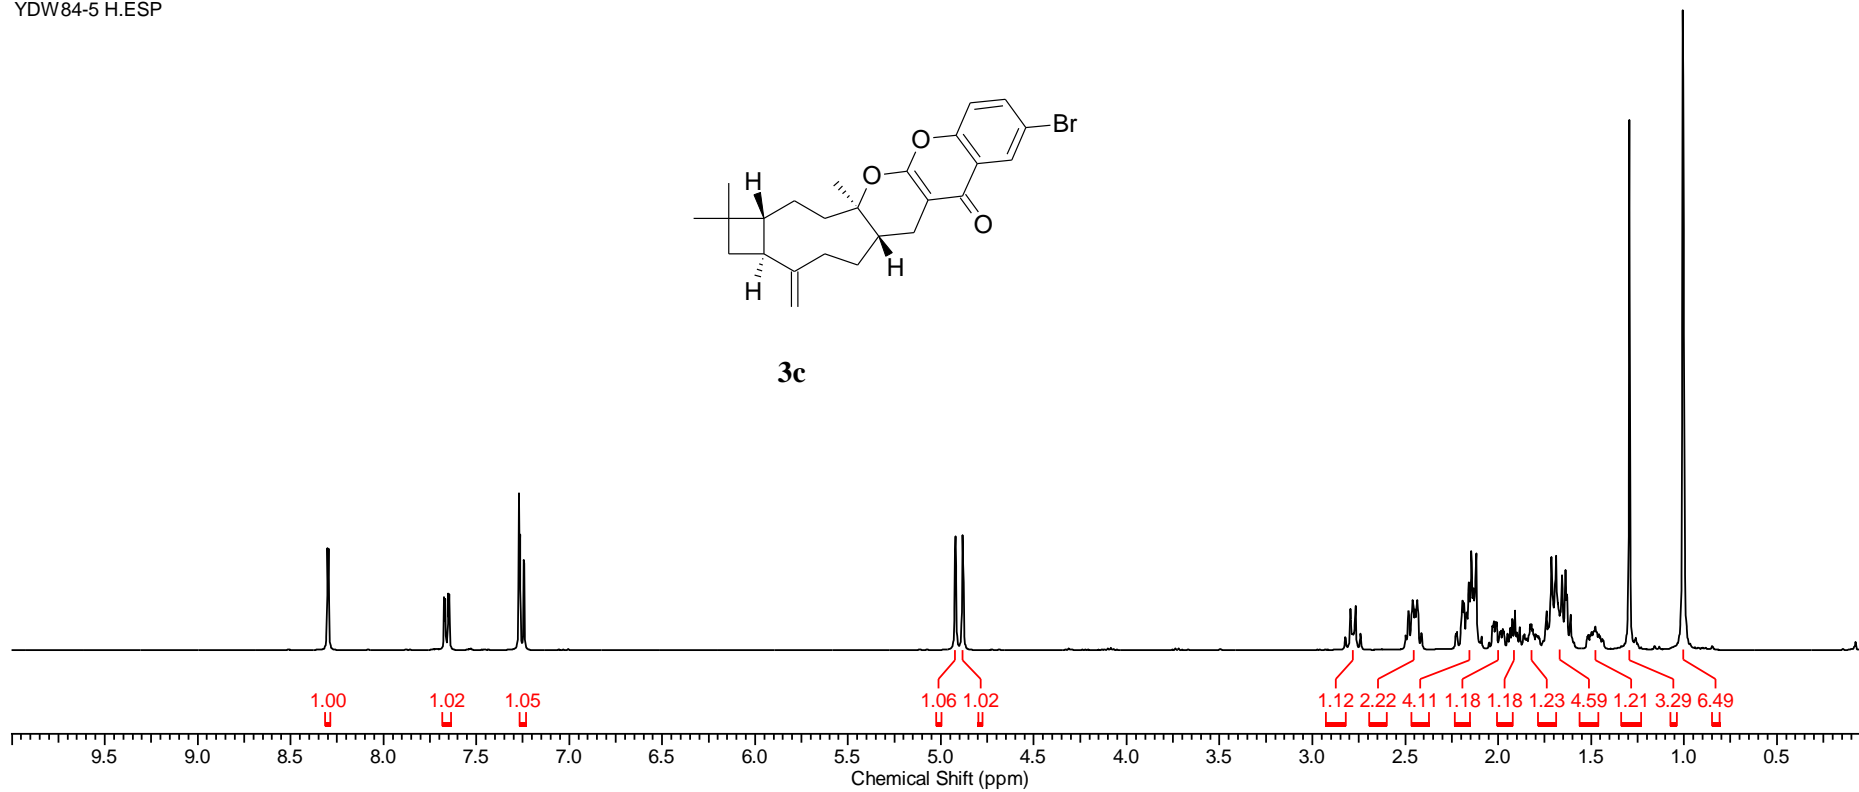

DEPT135 and  $^{13}\text{C}$  NMR

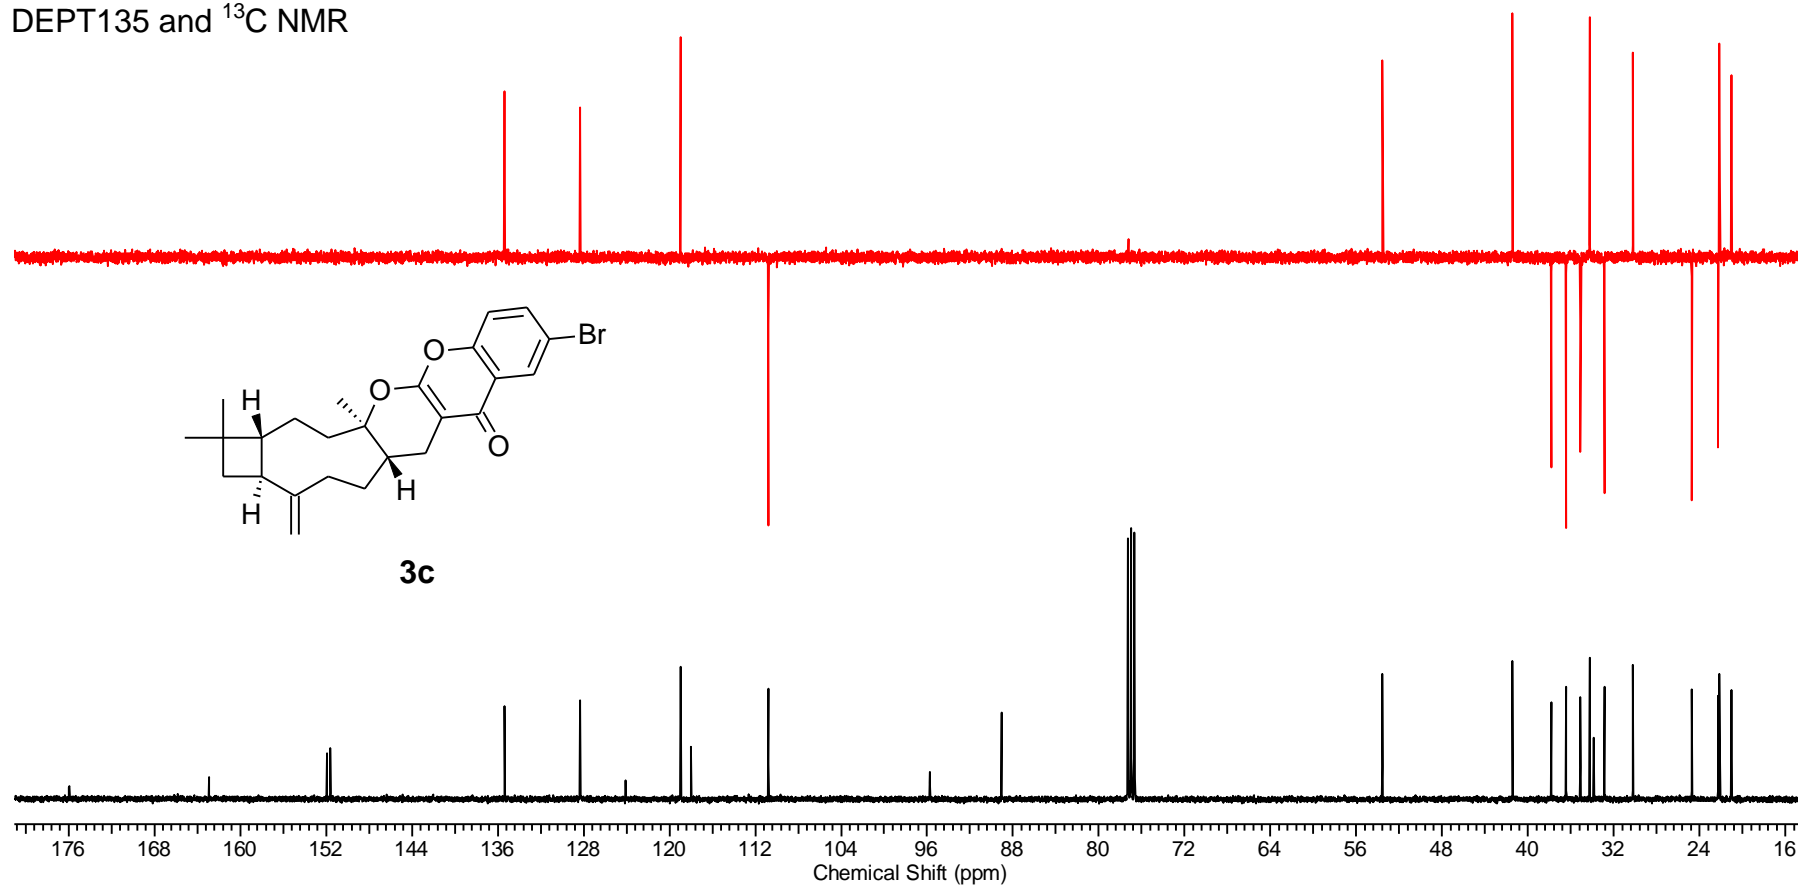

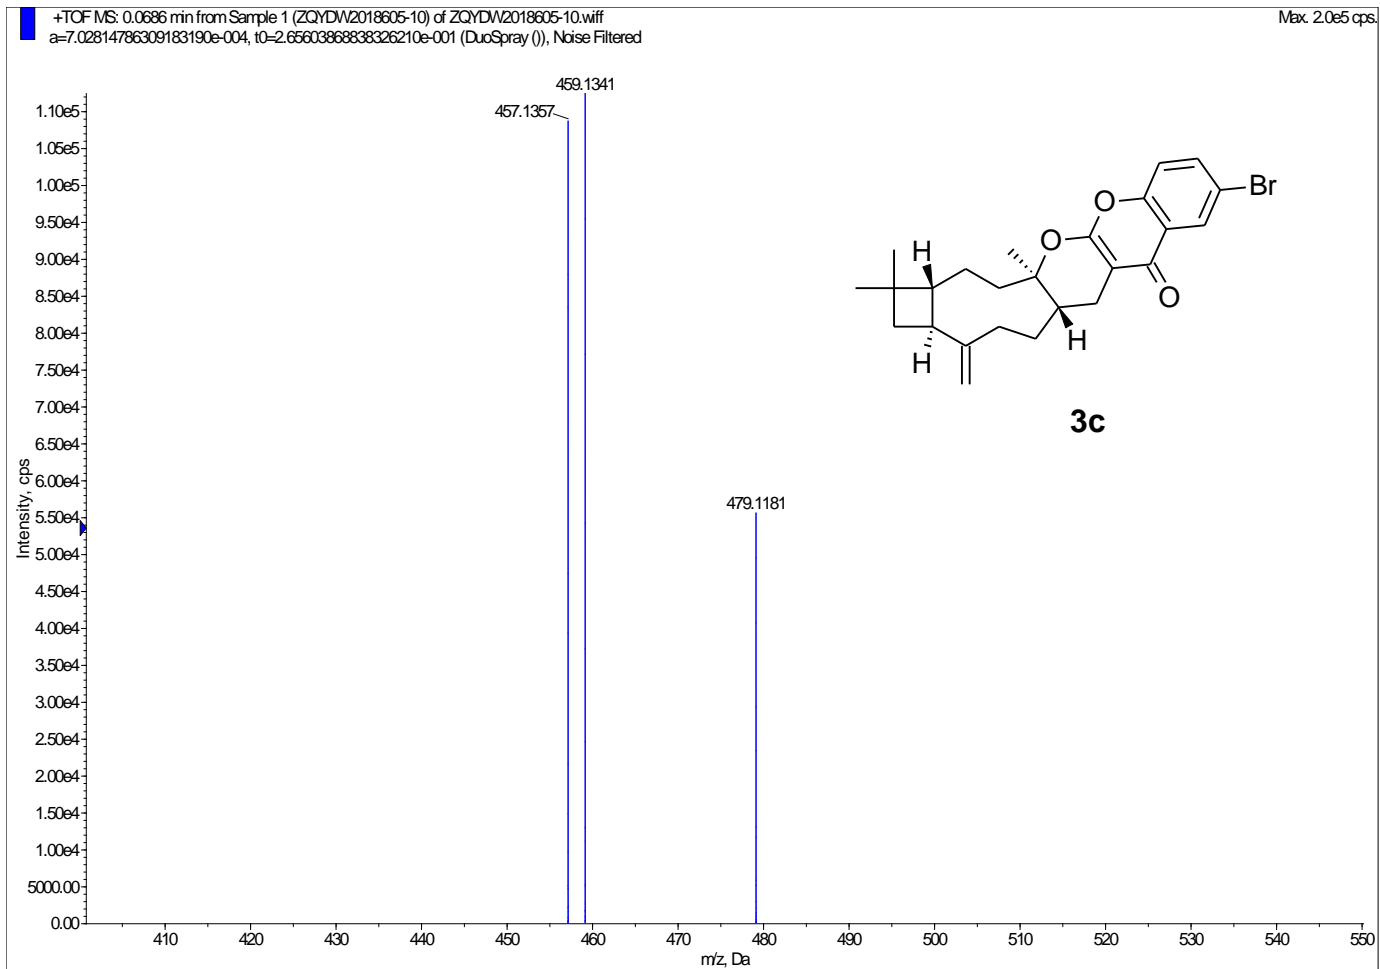

Compound 4c

4c <sup>1</sup>H-NMR

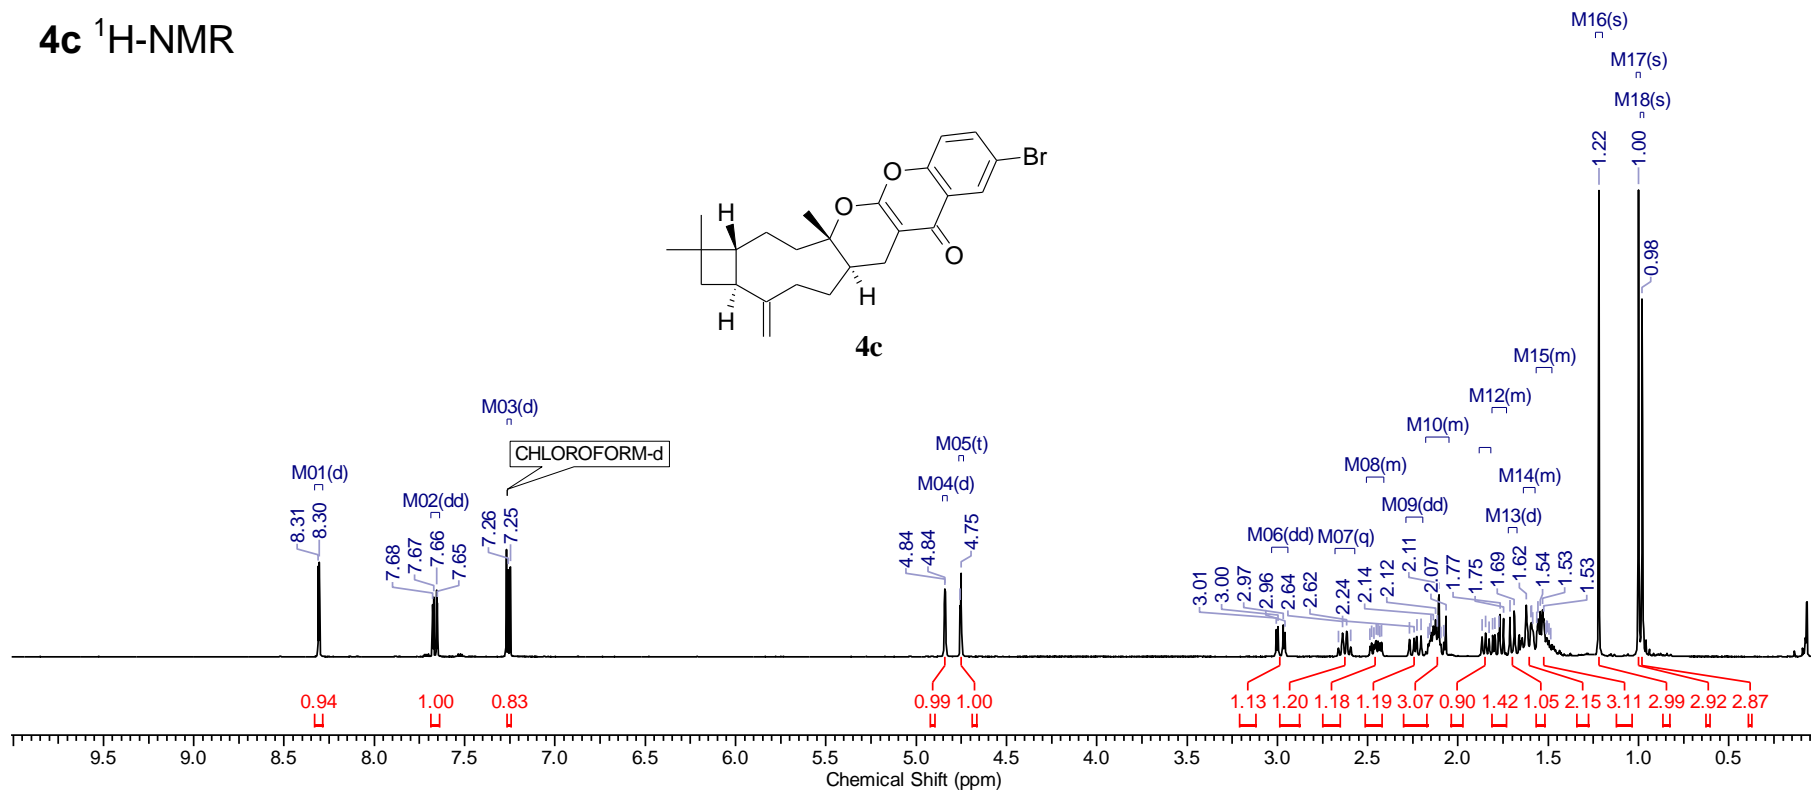

DEPT135 and  $^{13}\text{C}$  NMR

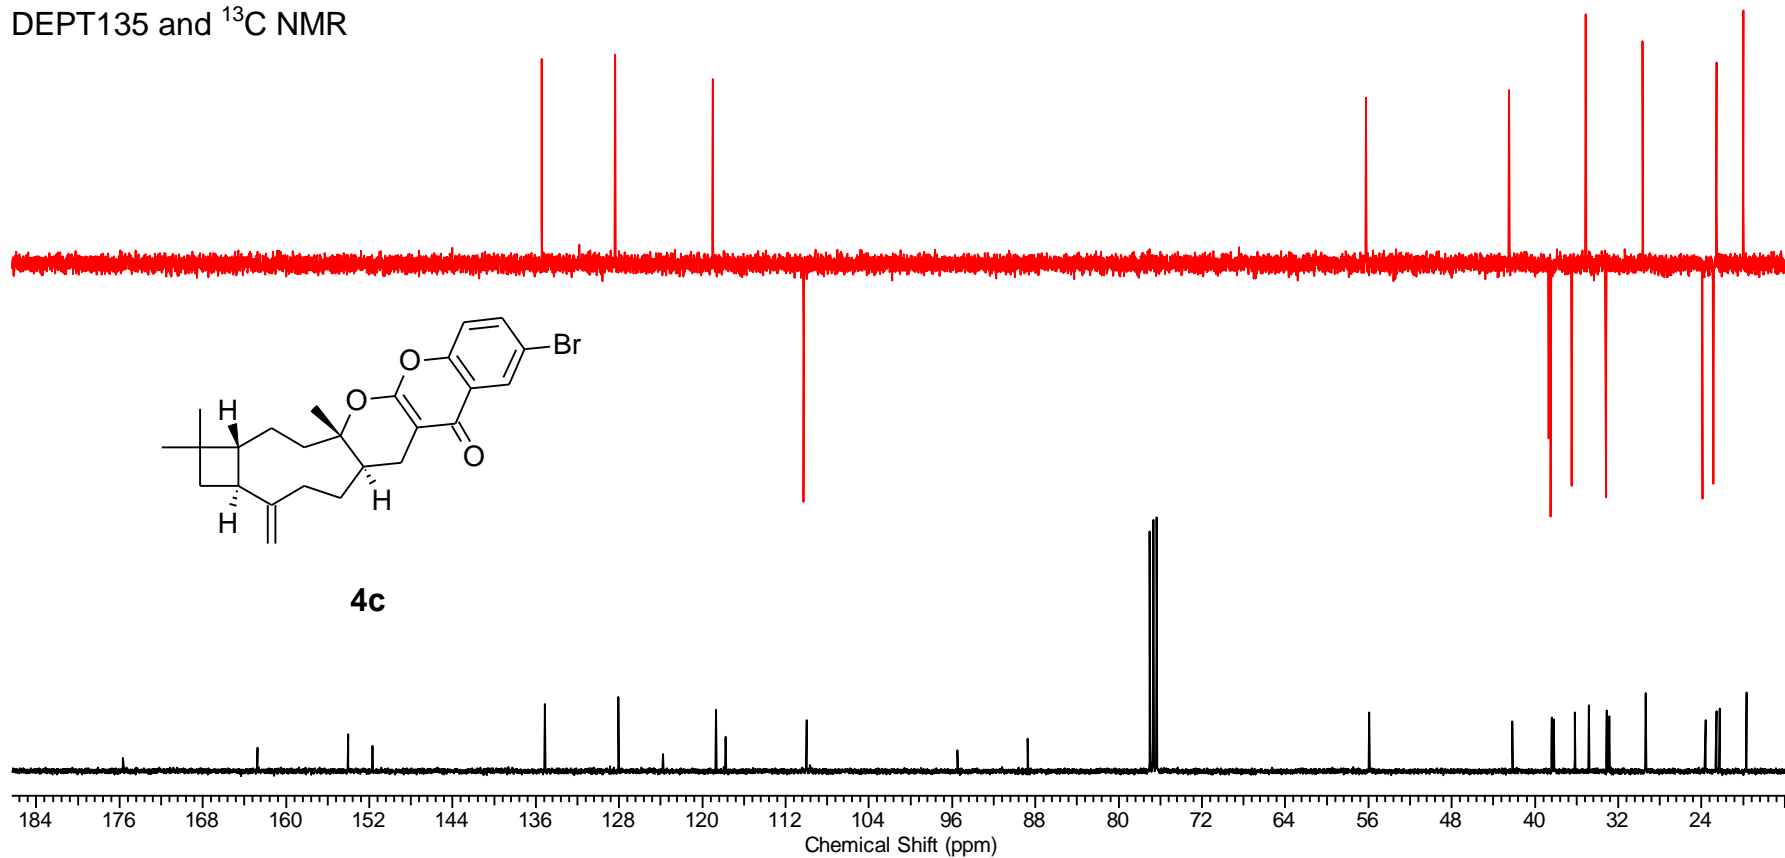



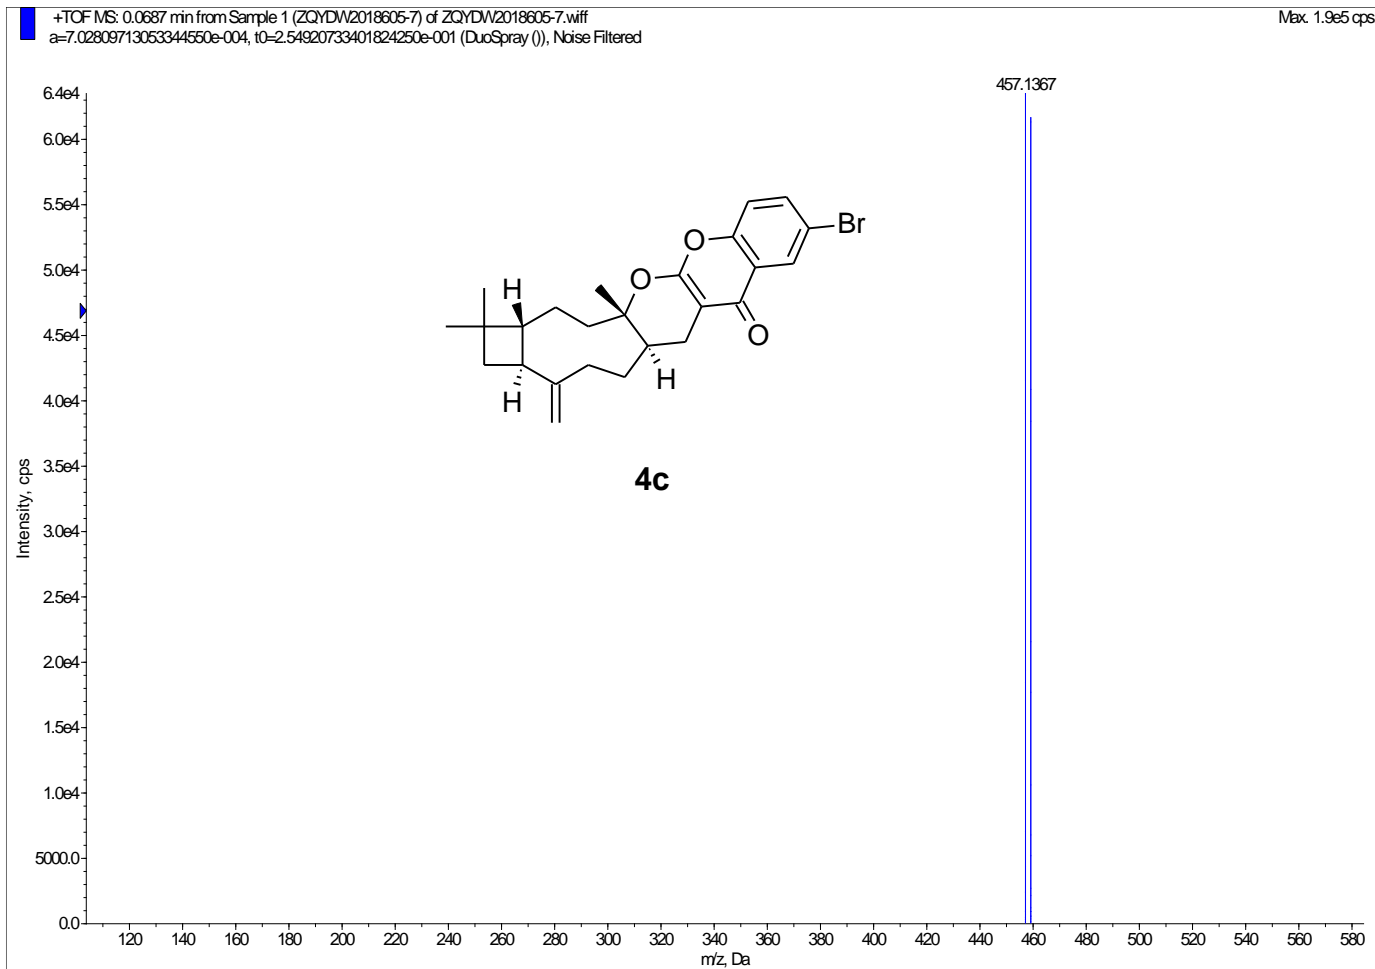

Compound 5c

5c <sup>1</sup>H-NMR

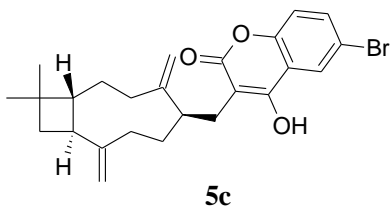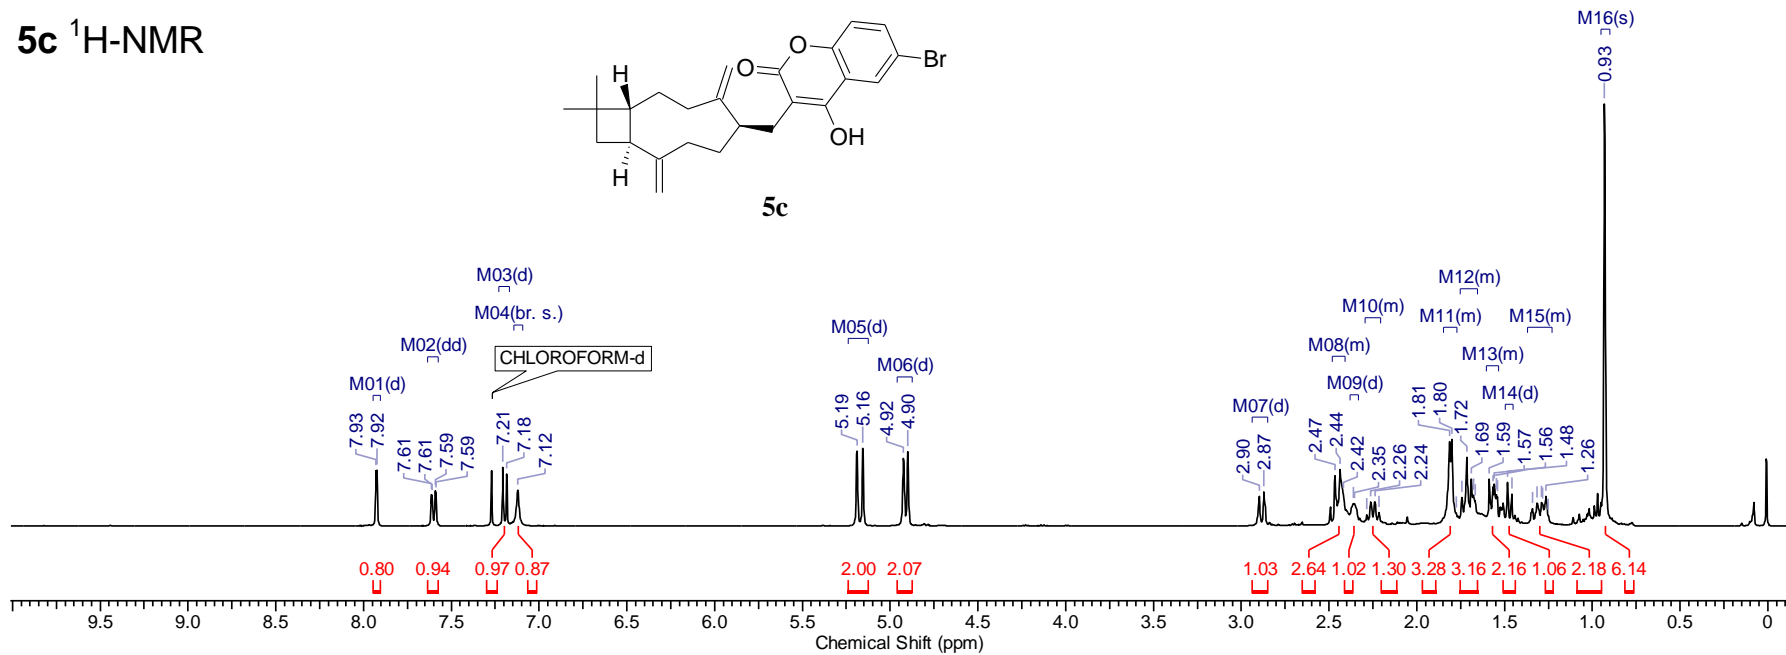

DEPT135 and  $^{13}\text{C}$  NMR

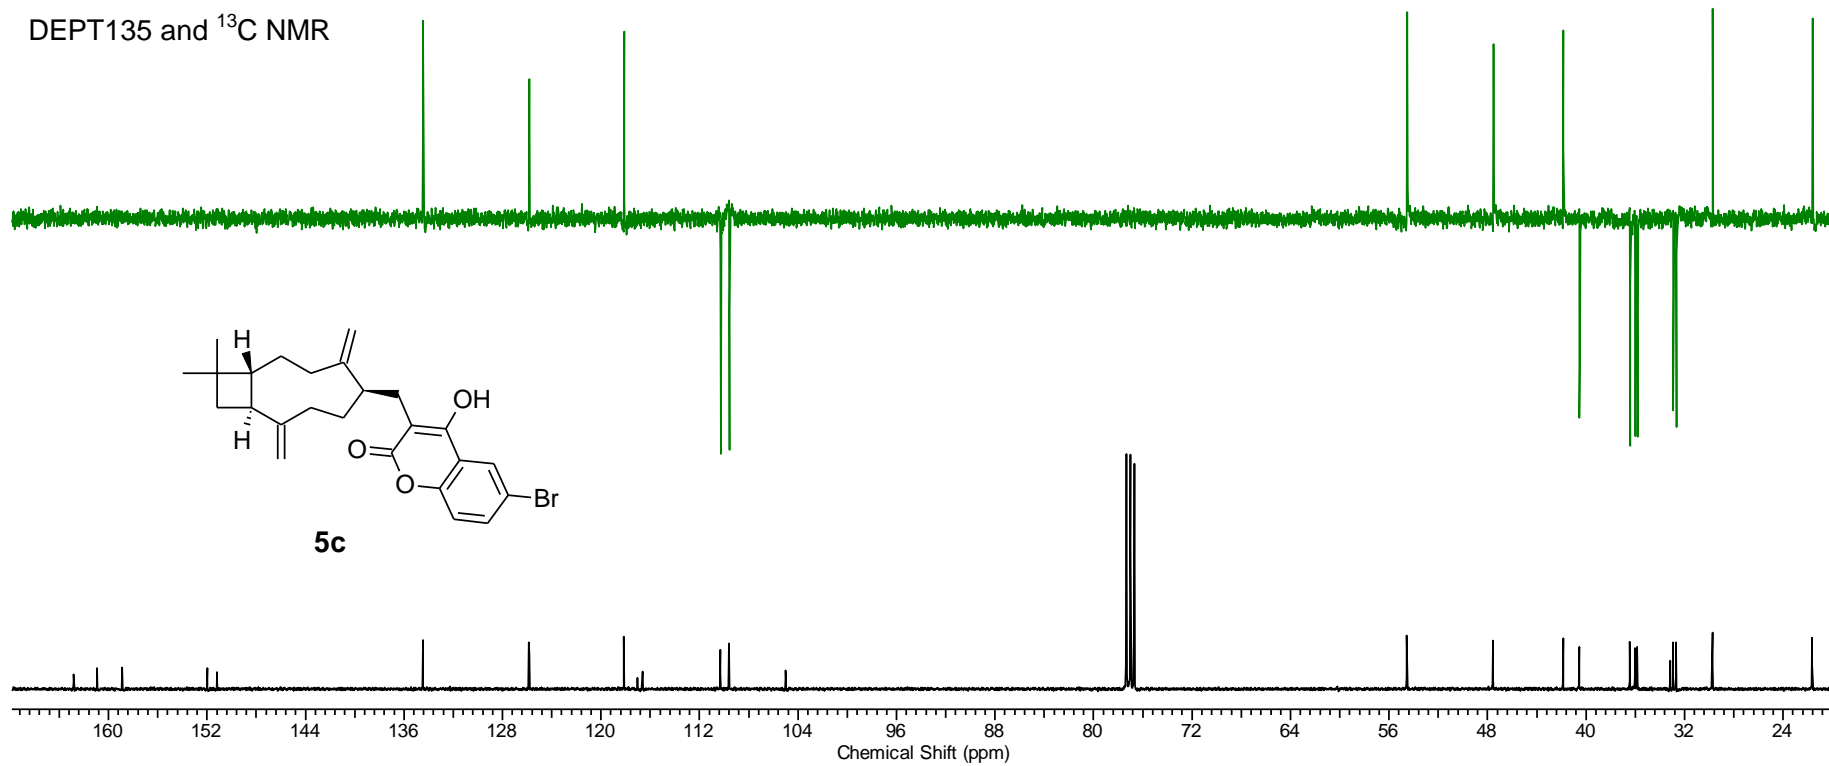



Compound 6

6 <sup>1</sup>H-NMR

MSJ 96-2 H.ESP

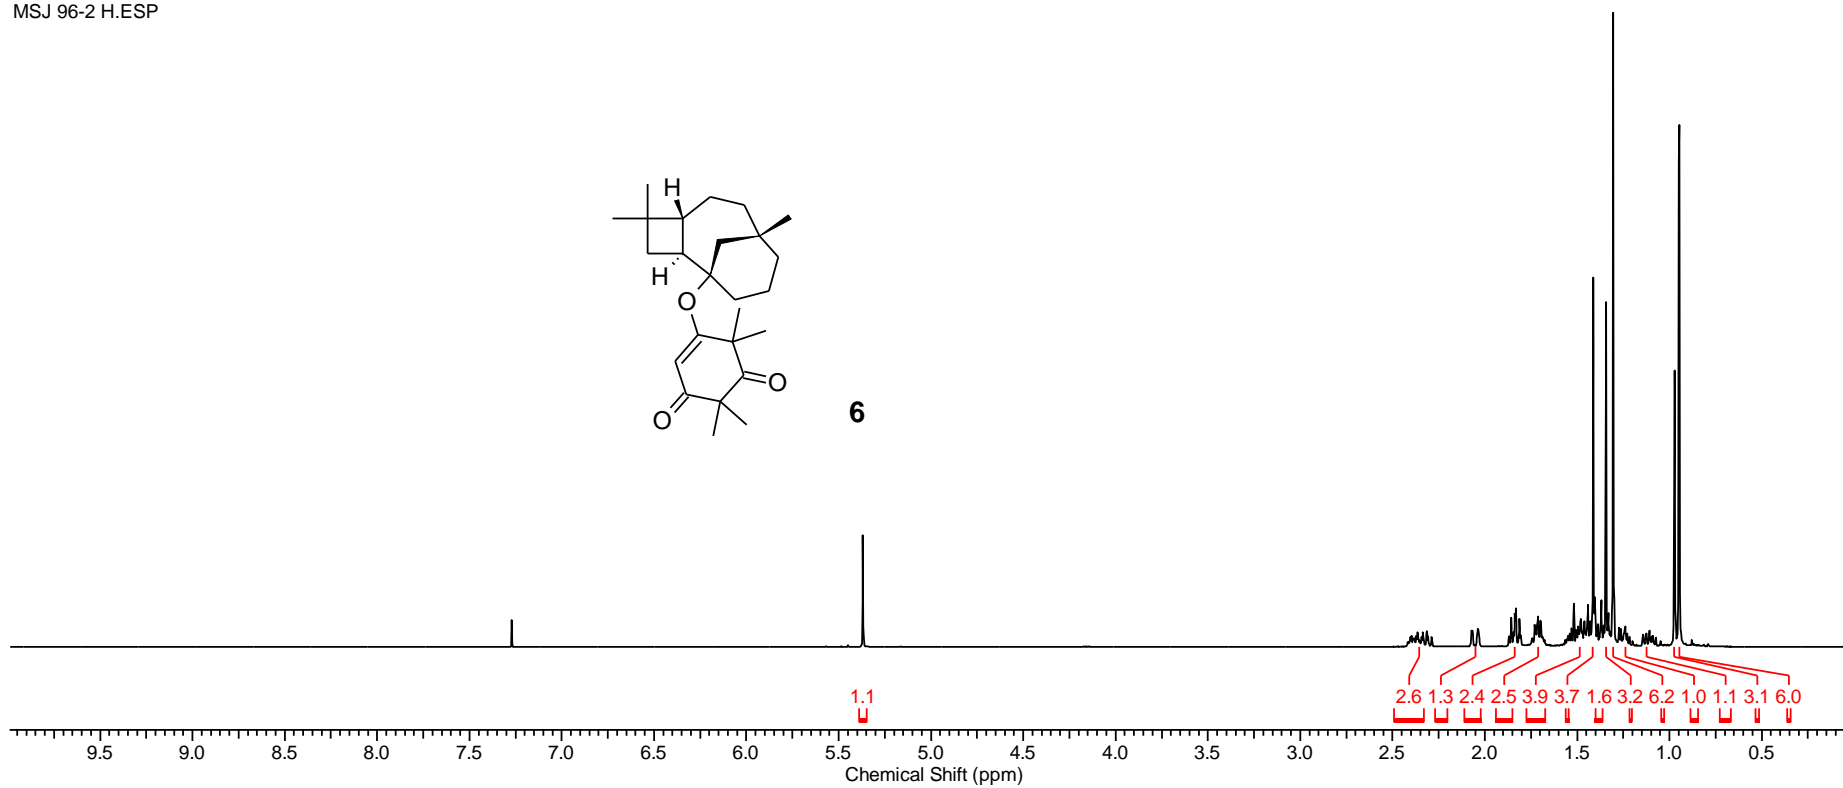

DEPT and <sup>13</sup>CNMR

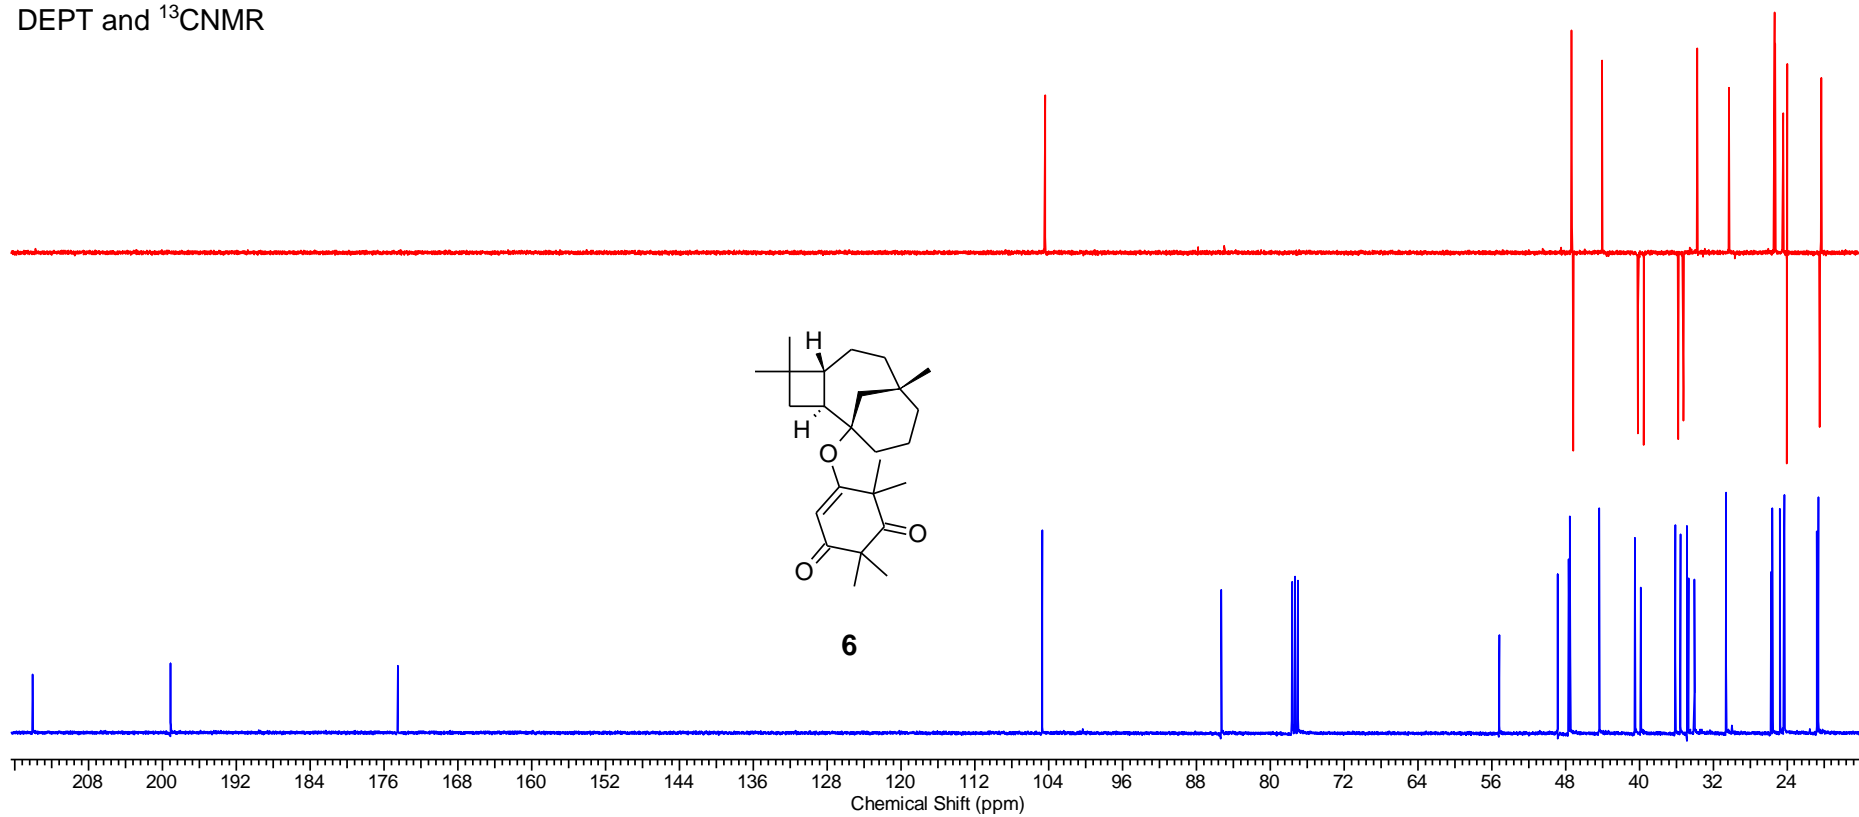

HSQC

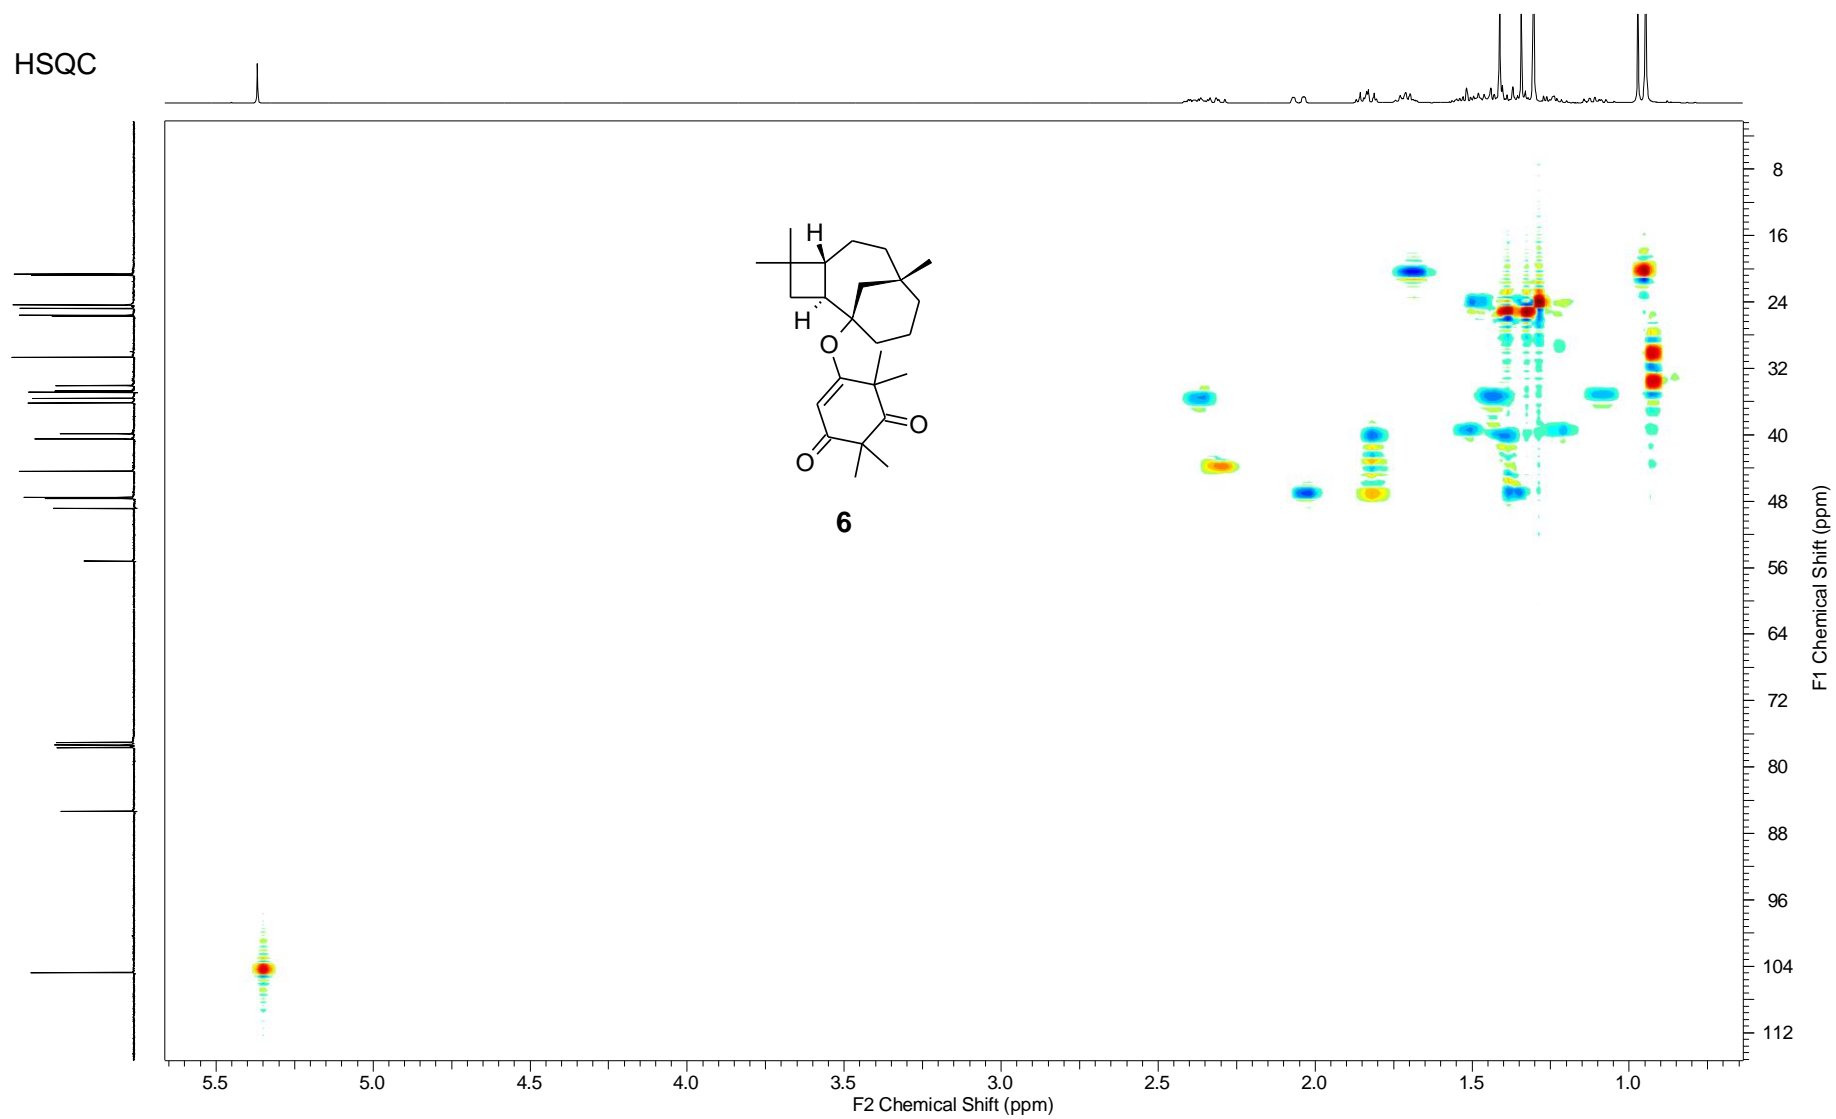

COSY

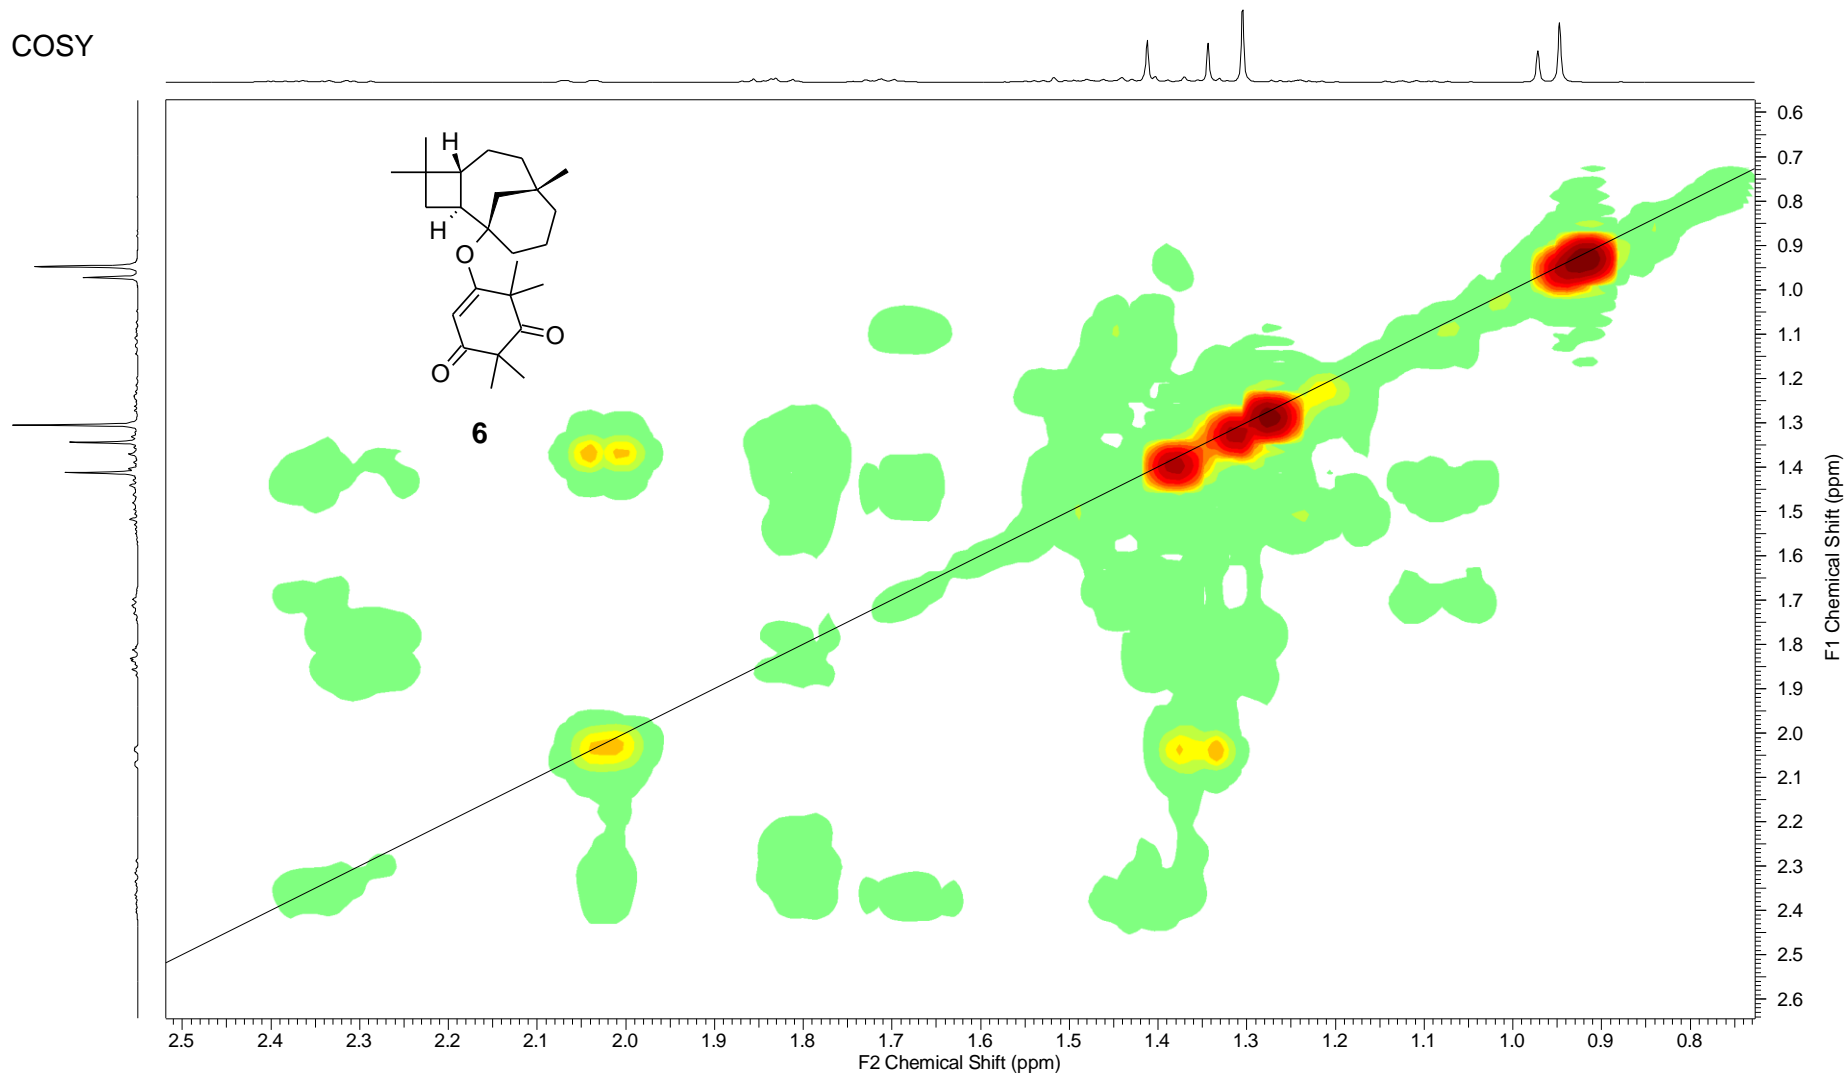



HMBC

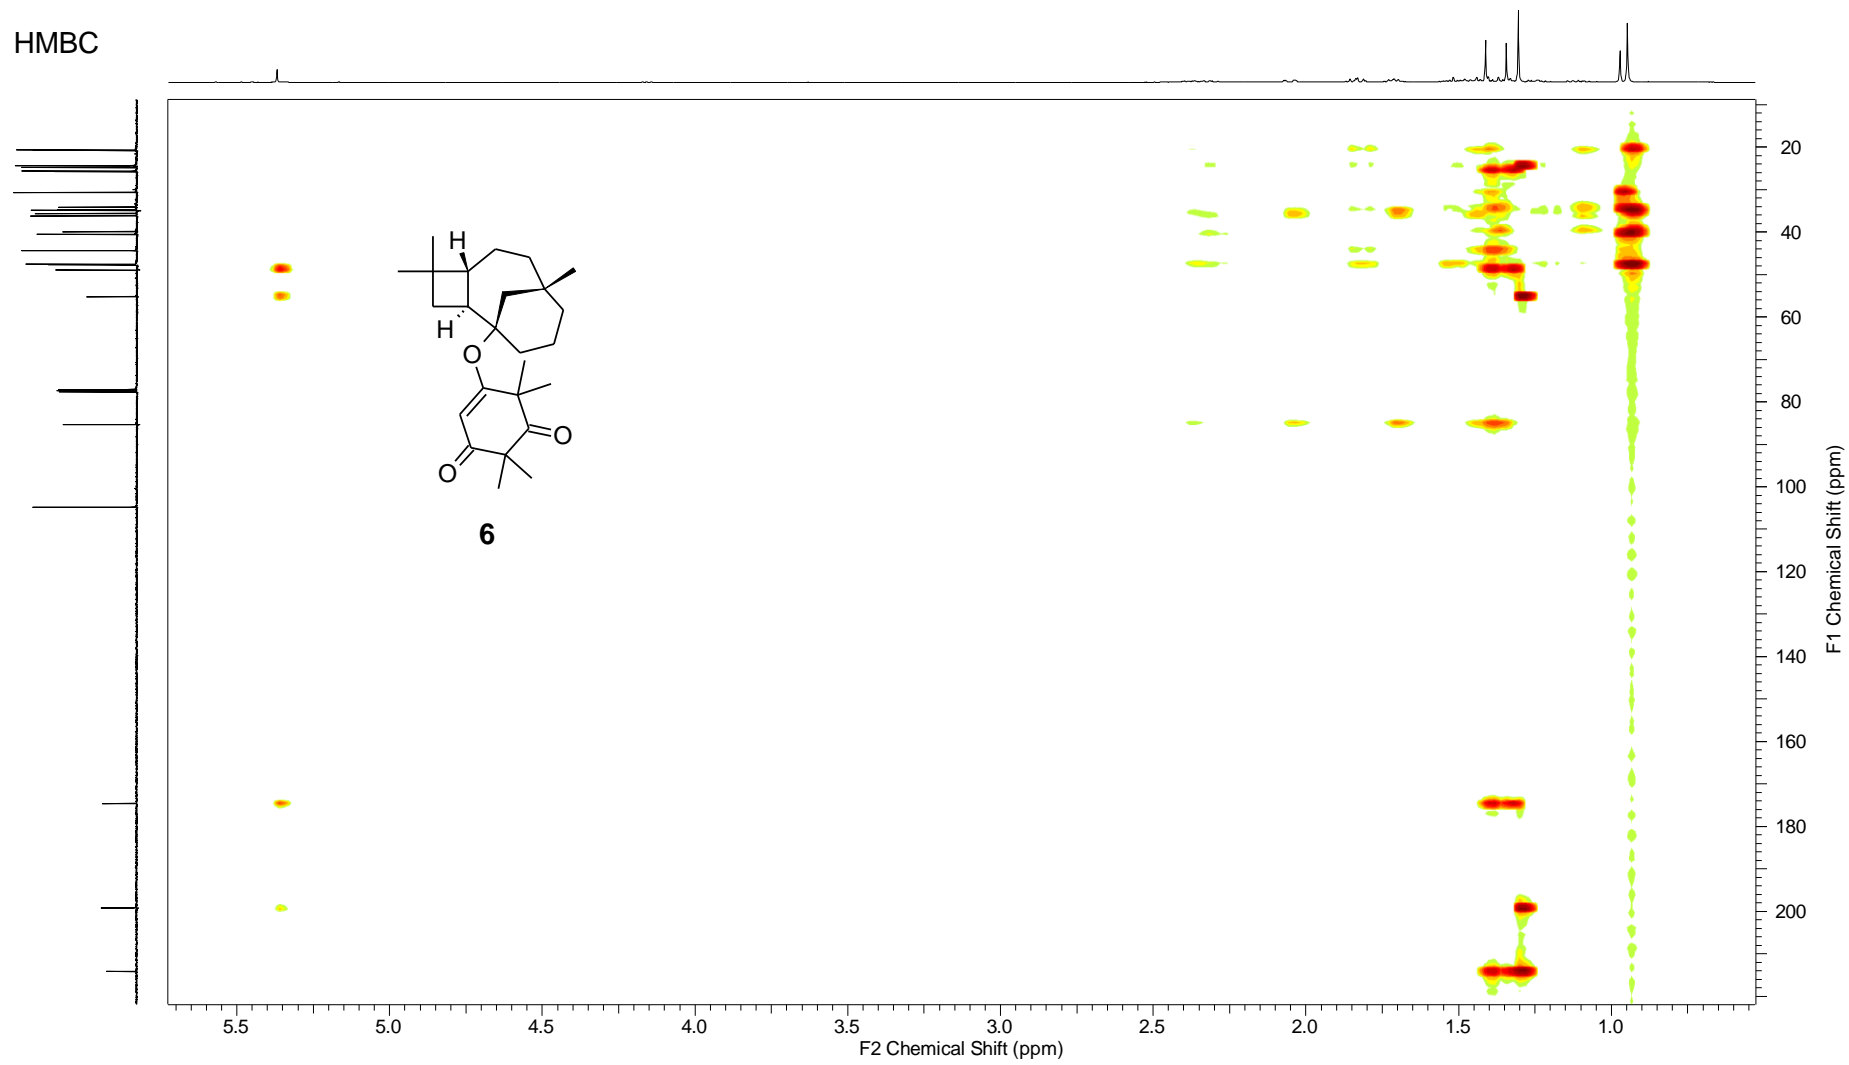

NOESY

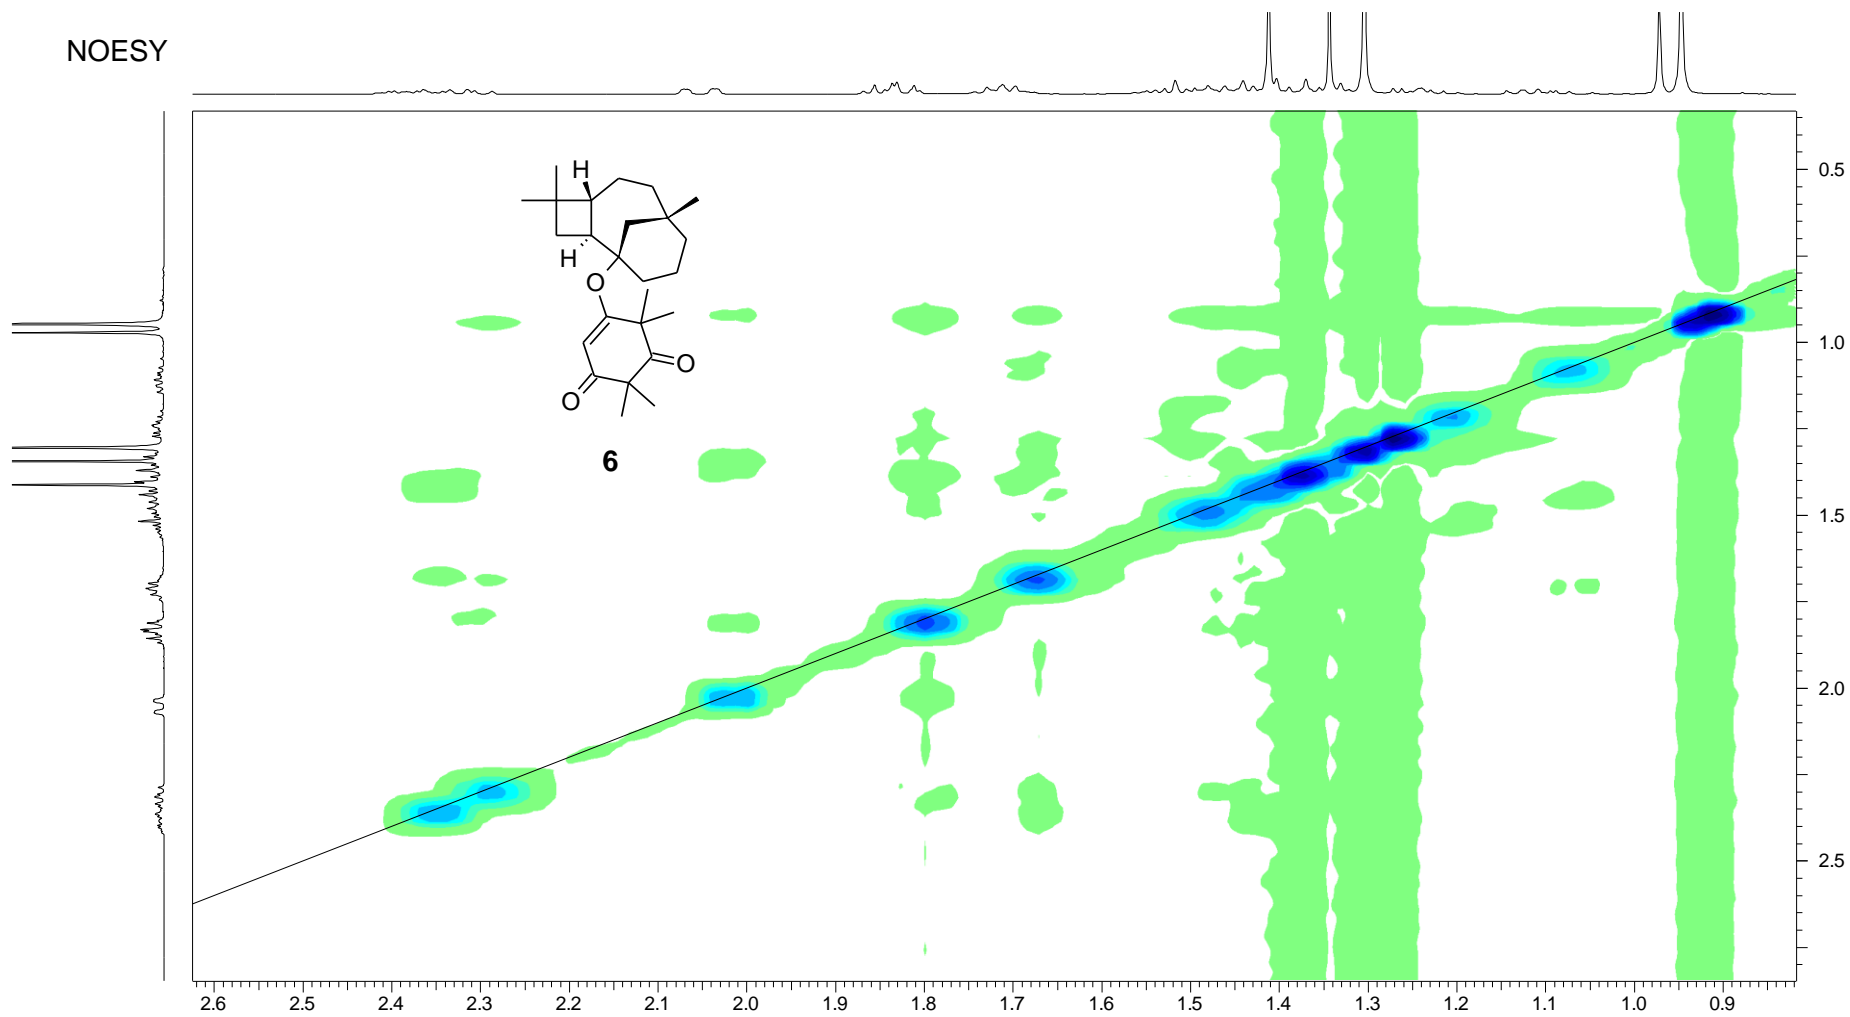

# HR-ESI-MS

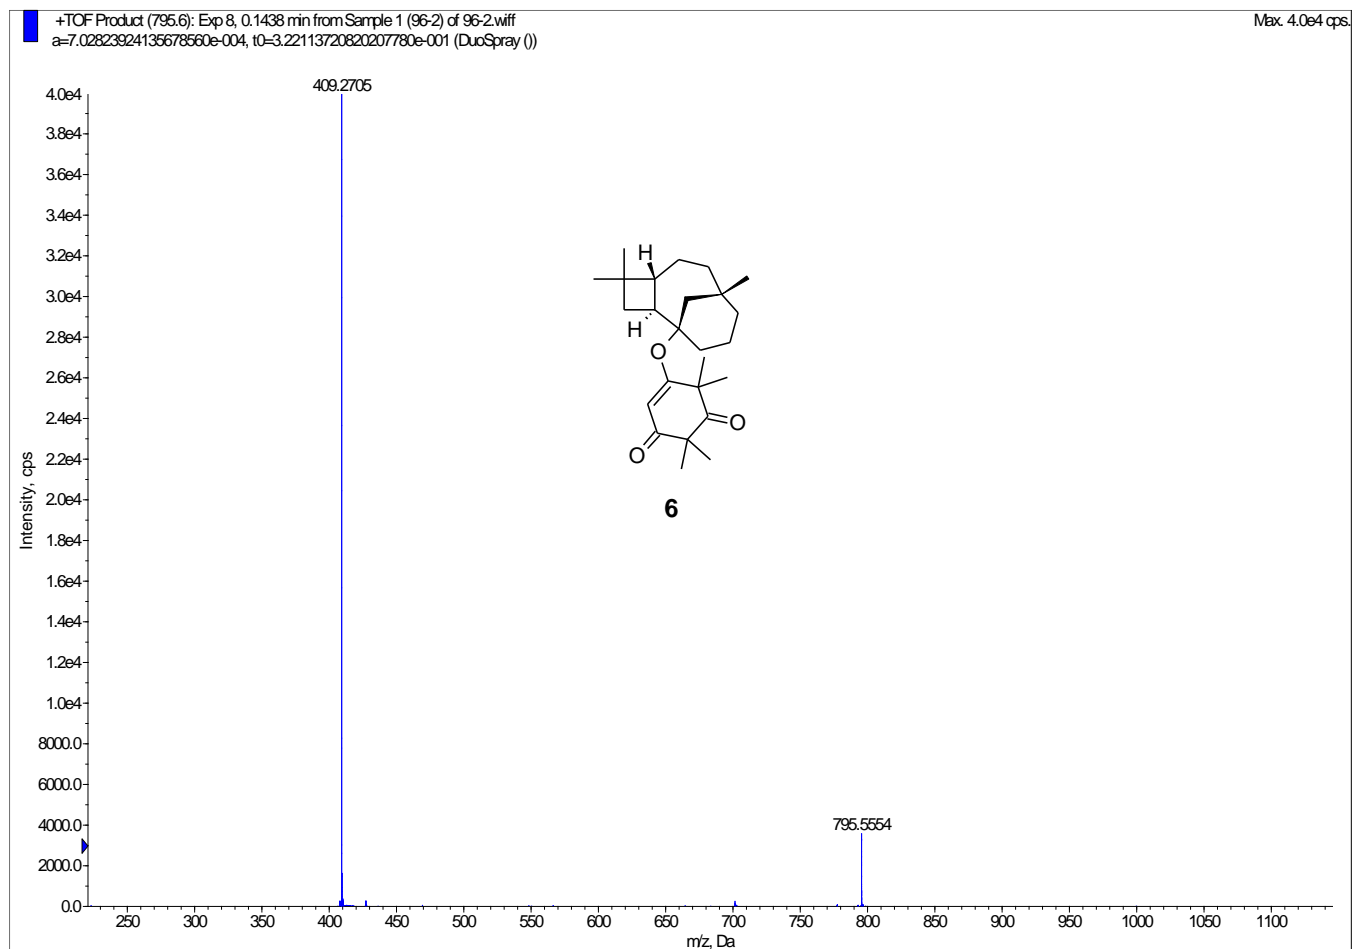

# Compound 7

## 7 <sup>1</sup>H-NMR

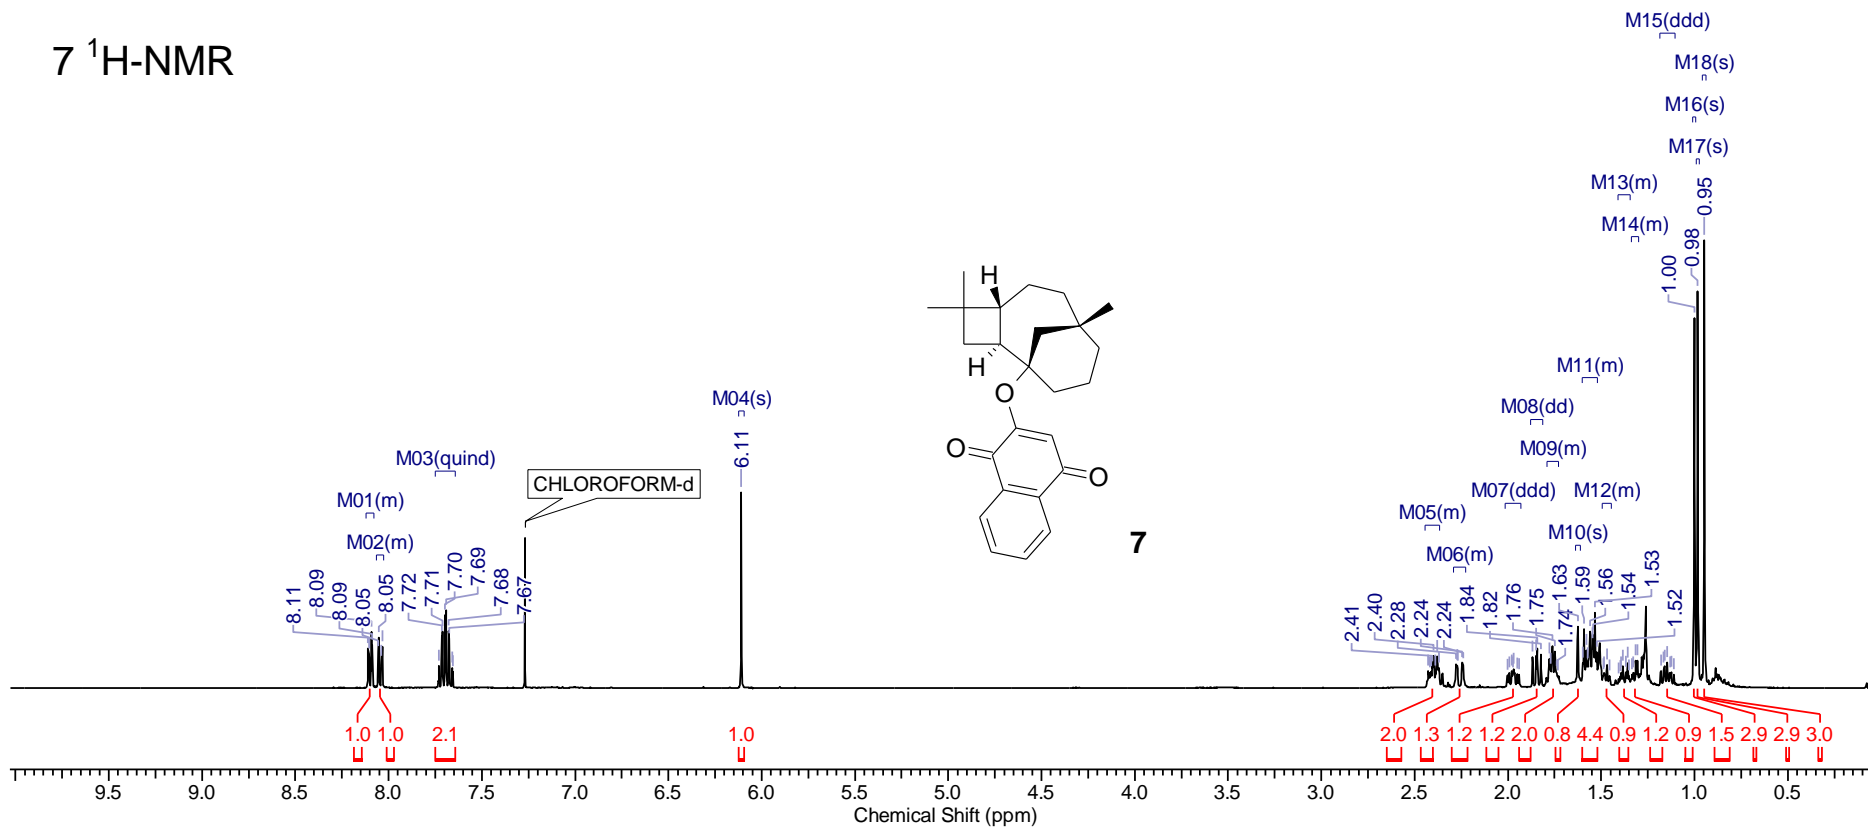

<sup>13</sup>C-NMR and DEPT135

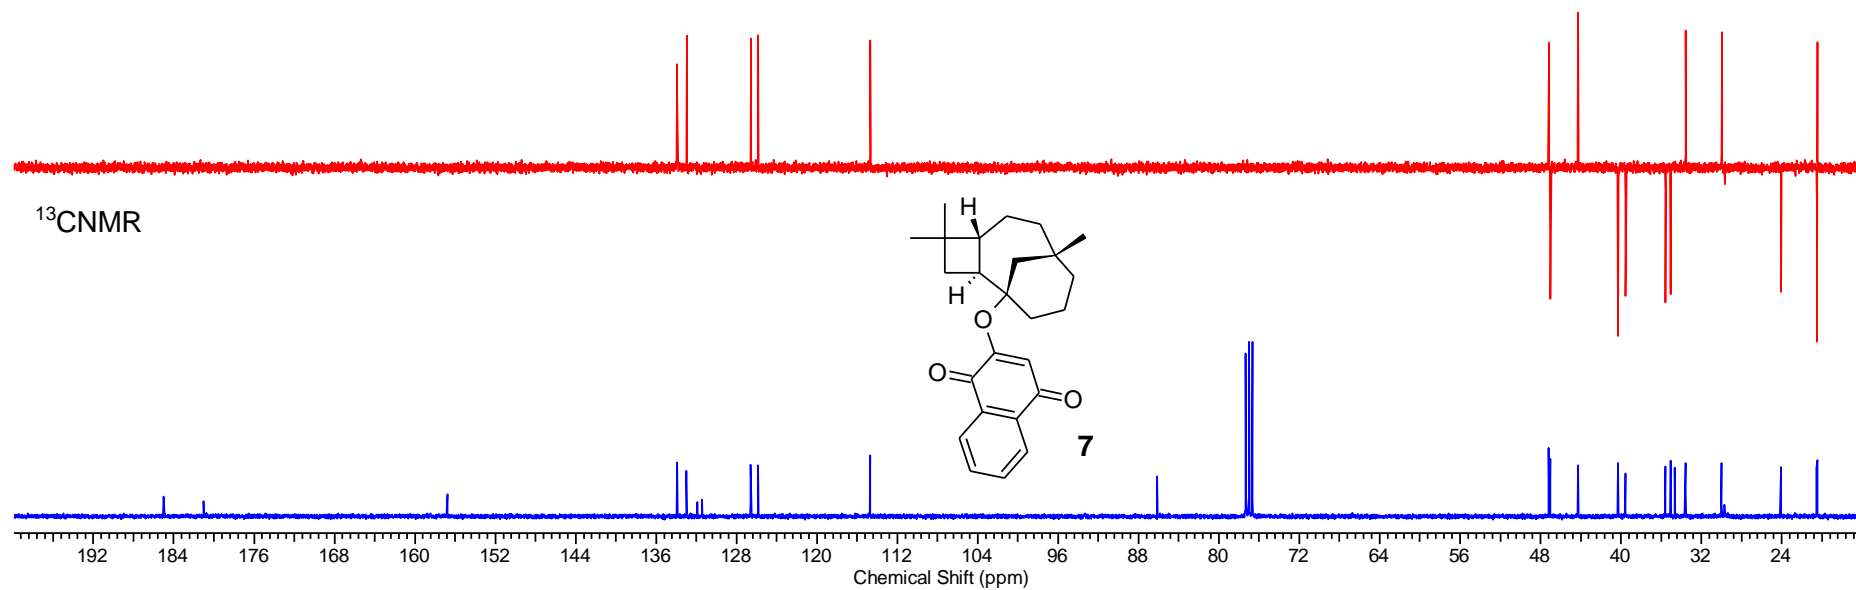

HSQC

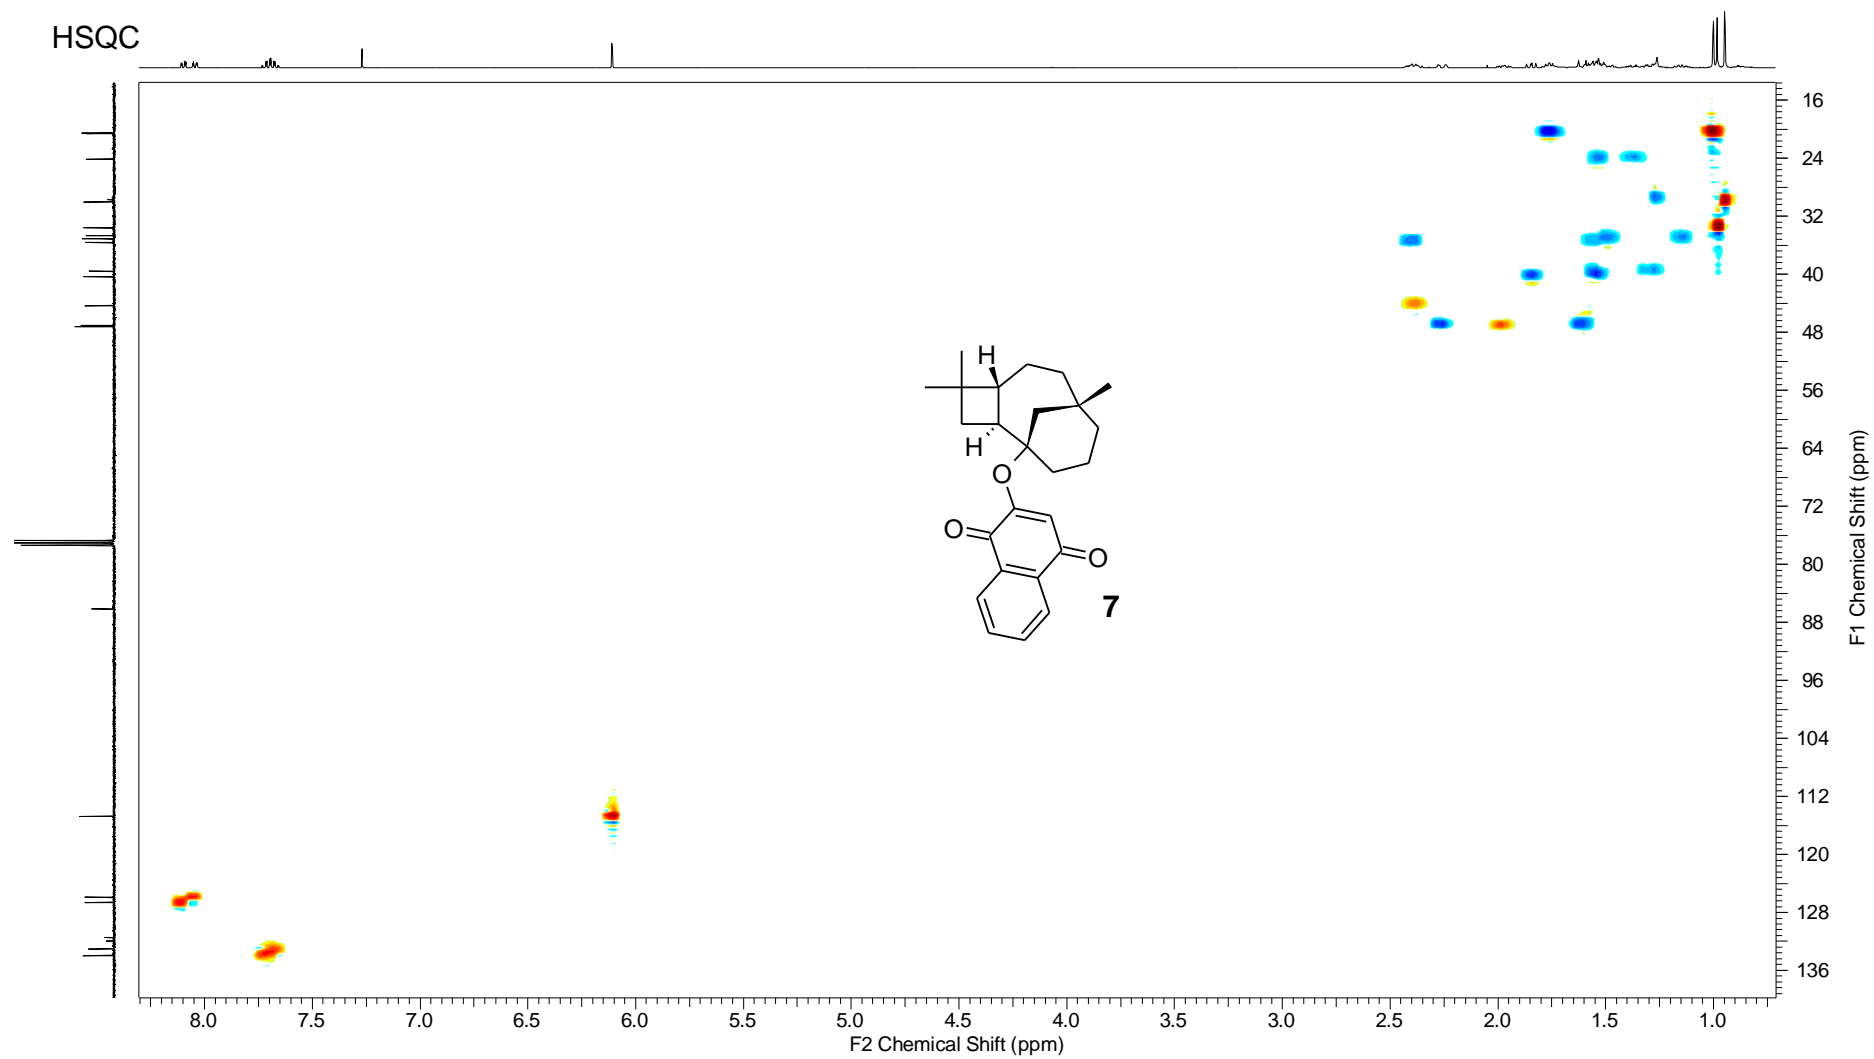

COSY

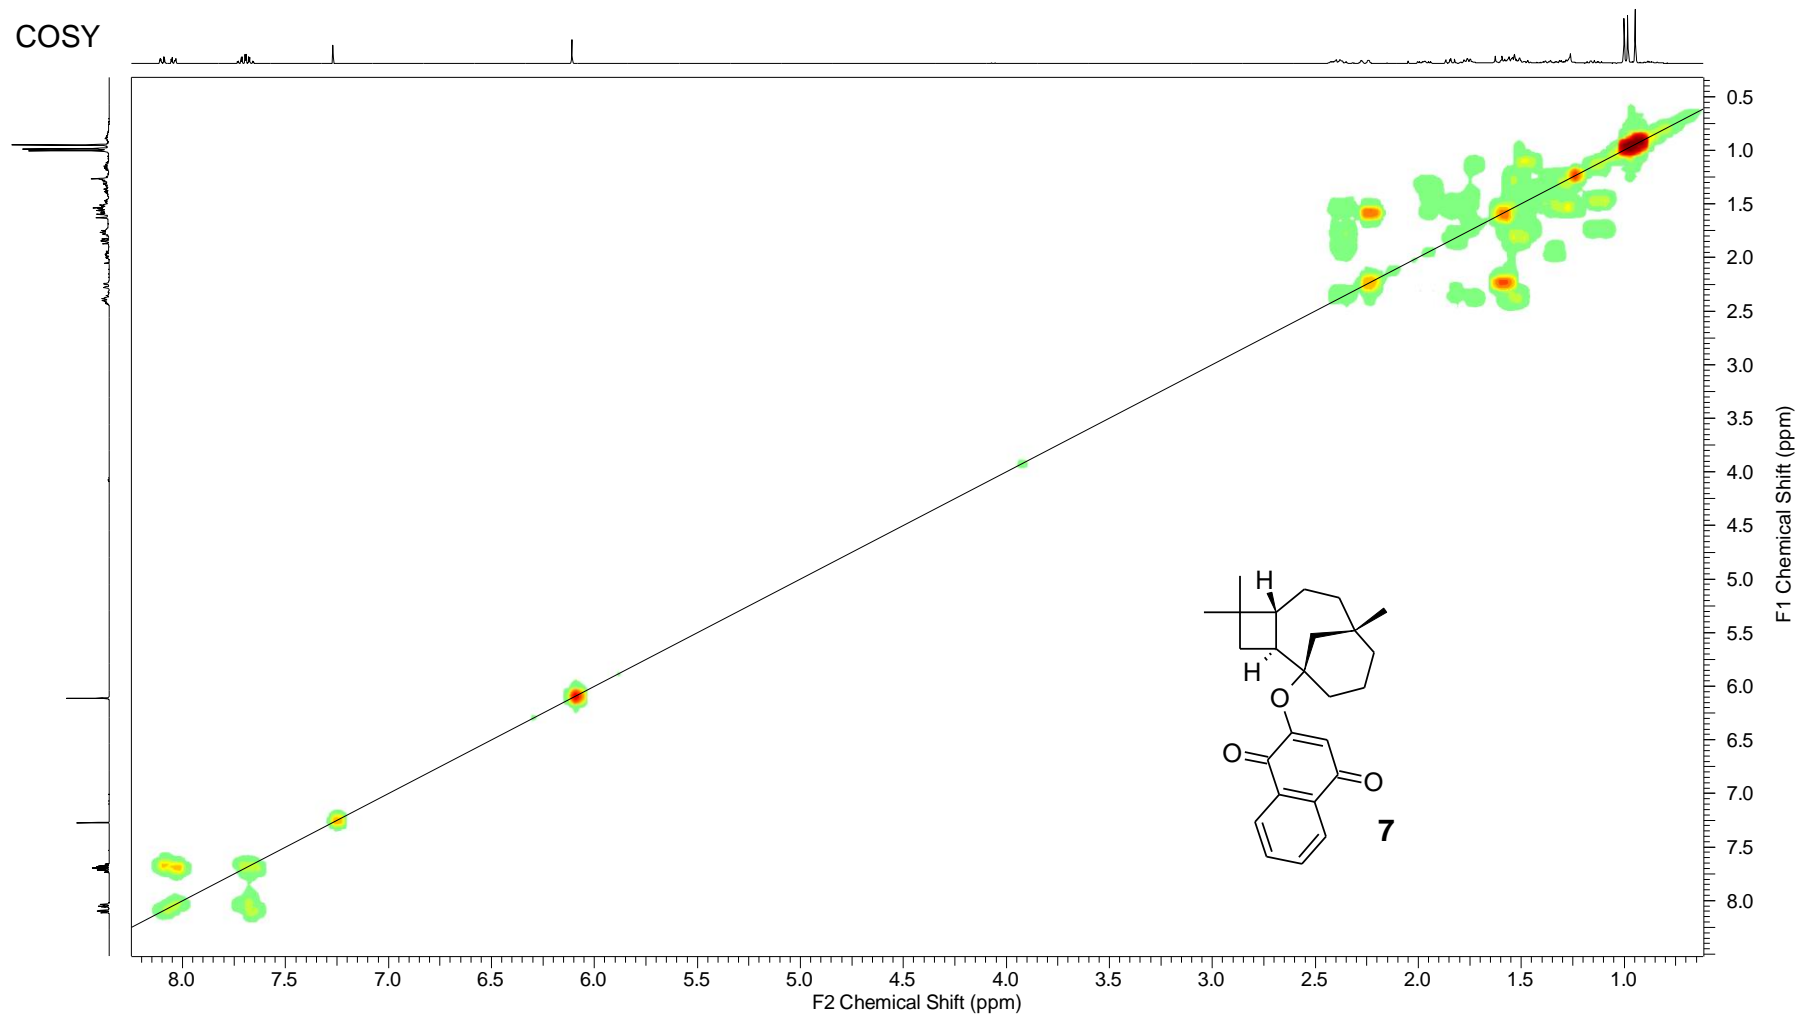

HMBC

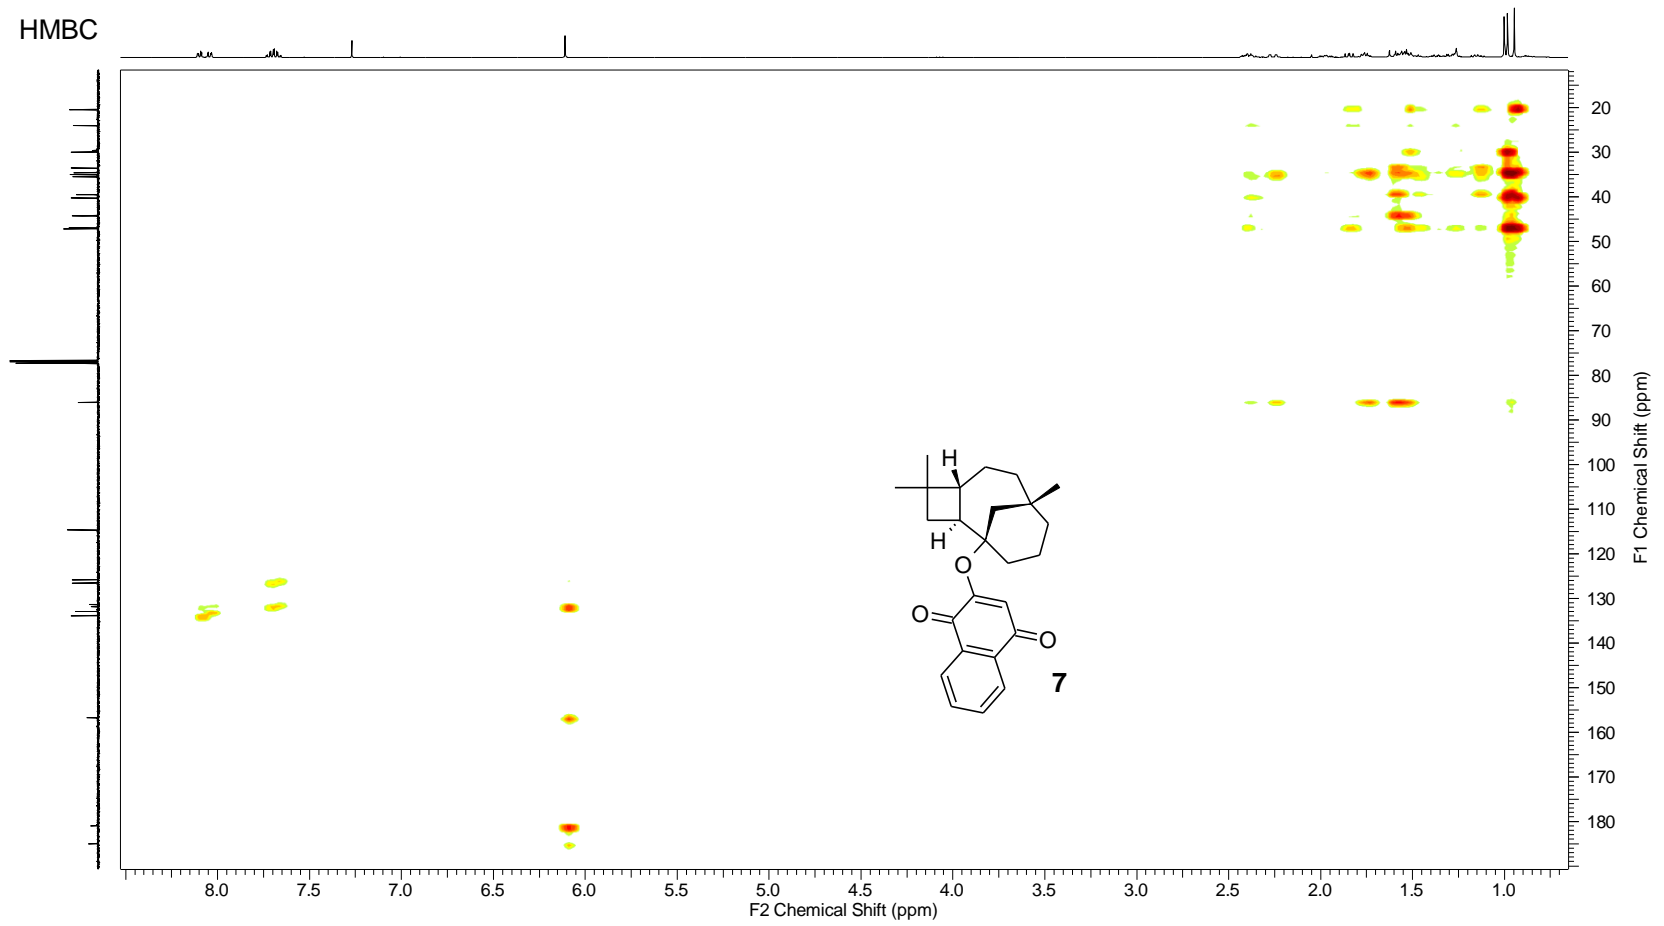



NOESY

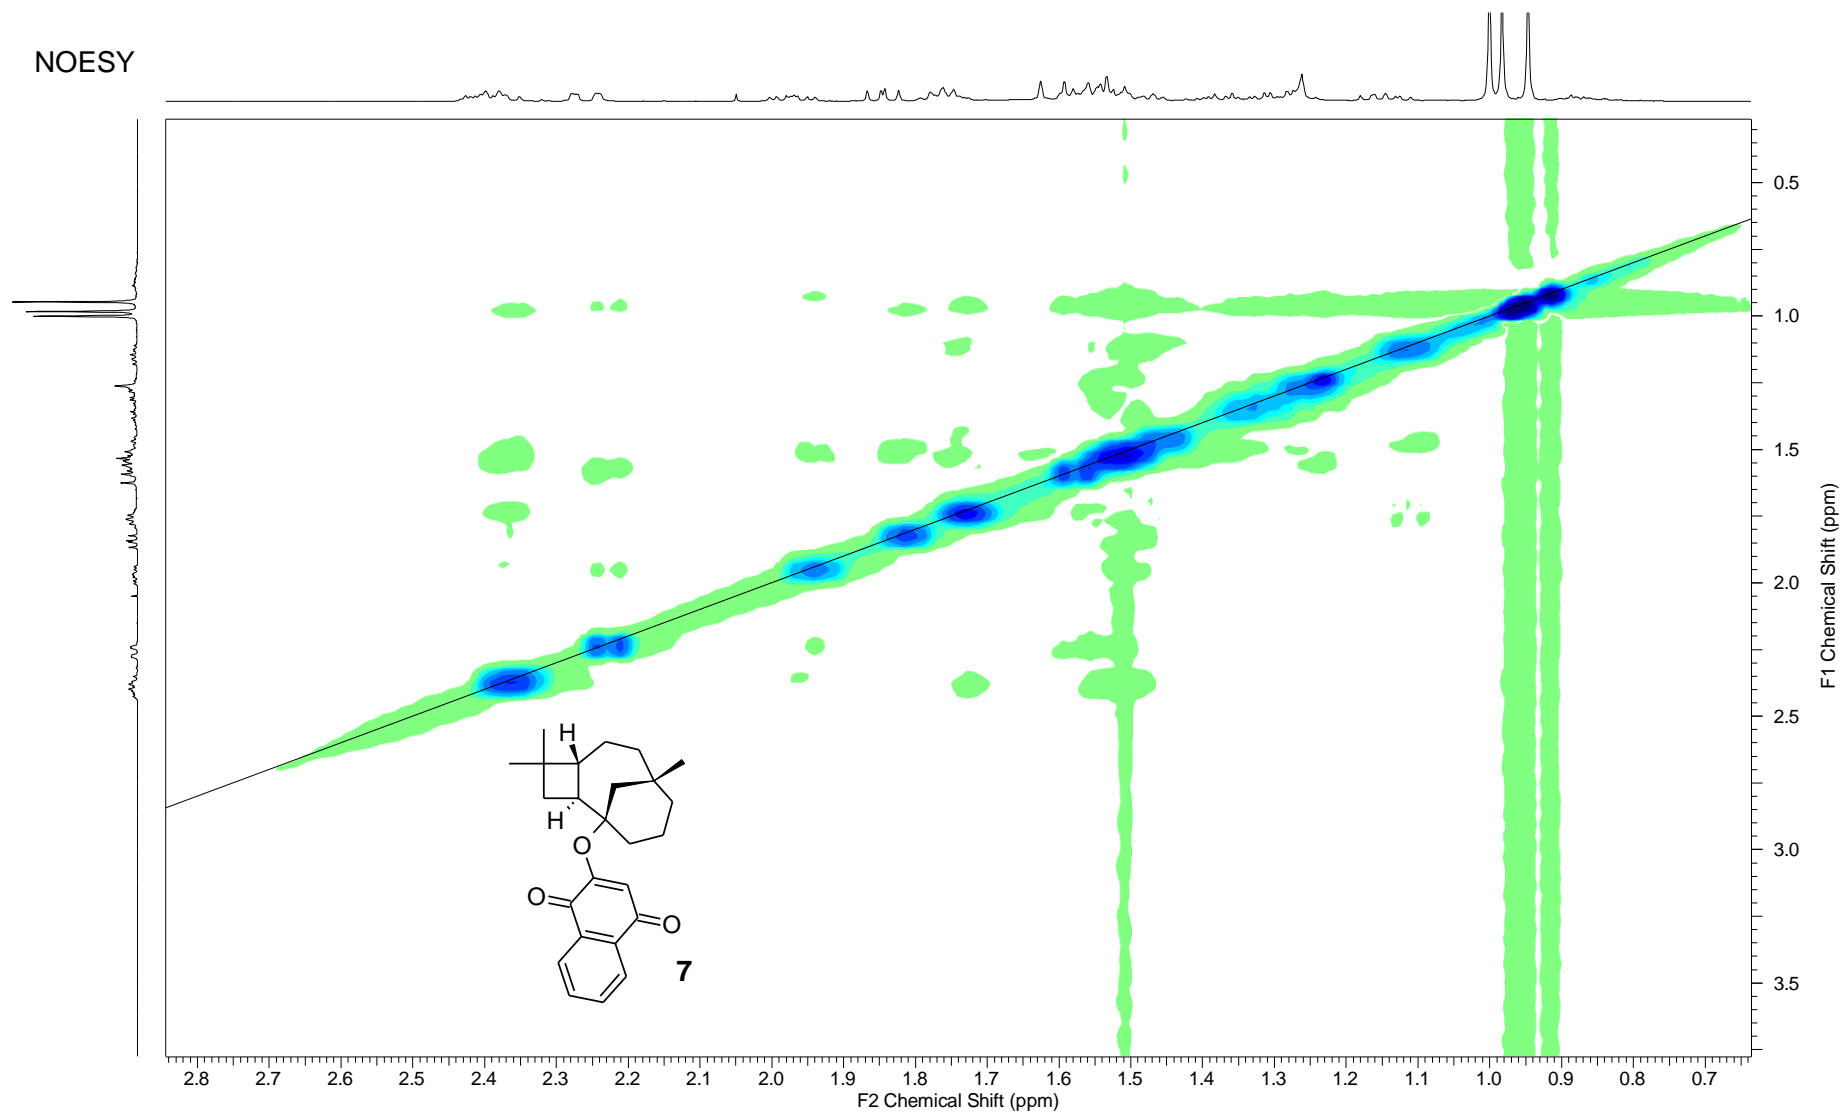

# HR-ESI-MS

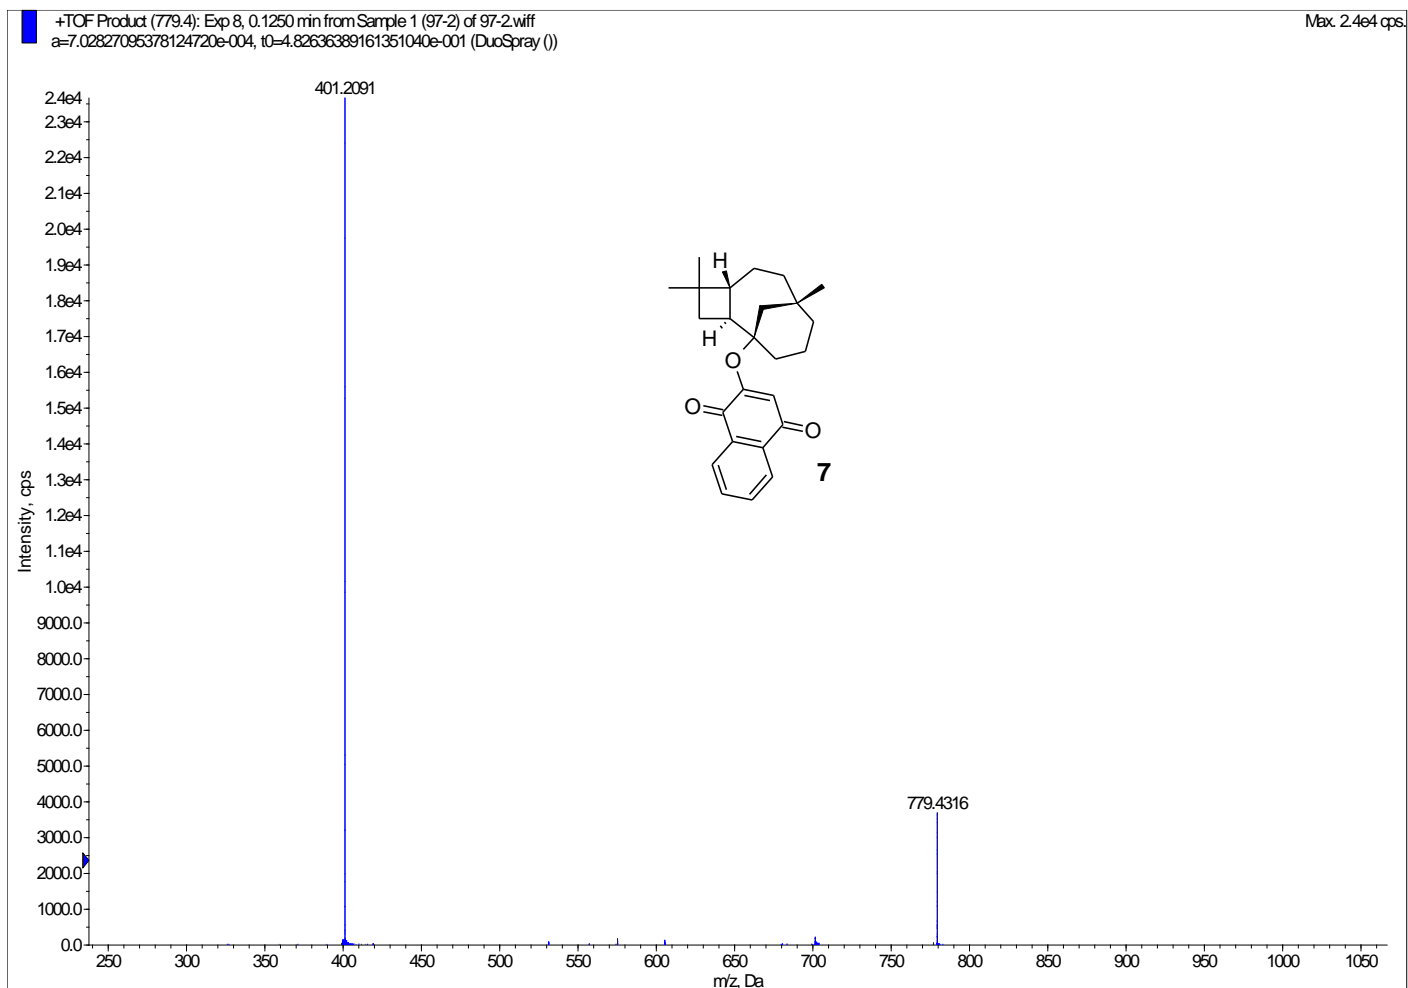

Supplement: molecules-25-00260-s001.pdf [file molecules-25-00260-s001.pdf]
